1 **Heparan sulfates are critical regulators of the inhibitory**  
2 **megakaryocyte-platelet receptor G6b-B**  
3

4 Timo Vögtle<sup>1</sup>, Sumana Sharma<sup>2</sup>, Jun Mori<sup>1</sup>, Zoltan Nagy<sup>1</sup>, Daniela Semeniak<sup>3</sup>, Mitchell J. Geer<sup>1</sup>,  
5 Christopher W. Smith<sup>1</sup>, Jordan Lane<sup>4</sup>, Scott Pollack<sup>4</sup>, Riitta Lassila<sup>5,6</sup>, Annukka Jouppila<sup>7</sup>, Alastair  
6 J. Barr<sup>8</sup>, Derek J. Ogg<sup>9</sup>, Tina D. Howard<sup>9</sup>, Helen J. McMiken<sup>9</sup>, Juli Warwicker<sup>9</sup>, Catherine Geh<sup>9</sup>,  
7 Rachel Rowlinson<sup>9</sup>, W. Mark Abbott<sup>9</sup>, Harald Schulze<sup>3</sup>, Gavin J. Wright<sup>2</sup>, Alexandra Mazharian<sup>1</sup>,  
8 Klaus Fütterer<sup>10</sup>, Sundaresan Rajesh<sup>11</sup>, Michael R. Douglas<sup>12,13,14</sup> and Yotis A. Senis<sup>1\*</sup>

9  
10 <sup>1</sup>Institute of Cardiovascular Sciences; College of Medical and Dental Sciences, University of  
11 Birmingham, Birmingham, UK

12 <sup>2</sup>Cell Surface Signalling Laboratory, Wellcome Trust Sanger Institute, Cambridge, UK.

13 <sup>3</sup>Institute of Experimental Biomedicine, University Hospital Würzburg, Josef-Schneider-Str. 2,  
14 D15, 97080 Würzburg, Germany

15 <sup>4</sup>Signature Discovery Limited, Nottingham, UK

16 <sup>5</sup>Coagulation Disorders Unit, University of Helsinki and Departments of Hematology and Clinical  
17 Chemistry (HUSLAB Laboratory Services), Comprehensive Cancer Center, Helsinki University  
18 Hospital, Helsinki, Finland

19 <sup>6</sup>Aplagon Oy, Helsinki, Finland

20 <sup>7</sup>Coagulation Disorders Unit, Helsinki University Hospital Research Institute, Helsinki, Finland

21 <sup>8</sup>Department of Biomedical Science, Faculty of Science & Technology, University of Westminster,  
22 London, UK

23 <sup>9</sup>Peak Proteins Limited, Alderley Park, Cheshire, UK

24 <sup>10</sup>School of Biosciences, <sup>11</sup>Institute of Cancer and Genomic Sciences; and <sup>12</sup>Institute of  
25 Inflammation and Ageing, College of Medical and Dental Sciences, University of Birmingham,  
26 Birmingham, UK

27 <sup>13</sup>Department of Neurology, Dudley Group NHS Foundation Trust, Russells Hall Hospital, Dudley,  
28 UK

29 <sup>14</sup>School of Life and Health Sciences, Aston University, Birmingham, UK  
30

31 **Keywords:** platelets, ITIM-receptor, G6b-B, heparan sulfate, heparin, perlecan, signaling, tyrosine  
32 phosphatases

33  
34 **\*Address correspondence to:**

35 Yotis Senis, PhD; Institute of Cardiovascular Sciences, College of Medical and Dental Sciences,  
36 University of Birmingham, Birmingham, UK; Phone: +44 (0)121 414 8308; Fax: +44 (0)121 415  
37 8817; E-mail: [y.senis@bham.ac.uk](mailto:y.senis@bham.ac.uk); ORCID profile: 0000-0002-0947-9957.  
38  
39

40

41

42 **ABSTRACT**

43 The immunoreceptor tyrosine-based inhibition motif (ITIM)-containing receptor G6b-B is critical  
44 for platelet production and activation, loss of which results in severe macrothrombocytopenia and  
45 aberrant platelet function in mice and humans. Using a combination of immunohistochemistry,  
46 affinity chromatography and proteomics, we identified the extracellular matrix heparan sulfate  
47 (HS) proteoglycan perlecan as a G6b-B binding partner. Subsequent *in vitro* biochemical studies  
48 and a cell-based genetic screen demonstrated that the interaction is specifically mediated by the  
49 HS chains of perlecan. Biophysical analysis revealed that heparin forms a high-affinity complex  
50 with G6b-B and mediates dimerization. Using platelets from humans and genetically-modified  
51 mice, we demonstrate that binding of G6b-B to HS and multivalent heparin inhibits platelet and  
52 megakaryocyte function by inducing downstream signaling via the tyrosine phosphatases Shp1  
53 and Shp2. Our findings provide novel insights into how G6b-B is regulated and contribute to our  
54 understanding of the interaction of megakaryocytes and platelets with glycans.

55

56

## 57 INTRODUCTION

58 Platelets are highly reactive anucleated cell fragments, produced by megakaryocytes  
59 (MKs) in the bone marrow, spleen and lungs. In an intact vasculature, platelets circulate in the  
60 blood stream for about eight to ten days and are finally cleared by reticulo-endothelial system.  
61 Upon vascular injury, however, platelets adhere to the exposed vascular extracellular matrix  
62 (ECM), become activated and form a hemostatic plug that seals the wound. Platelet activation  
63 must be tightly regulated to avoid hyperactivity and indiscriminate vessel occlusion (Bye, Unsworth,  
64 & Gibbins, 2016; Jackson, 2011). The mechanisms that inhibit platelet activation include extrinsic  
65 factors, such as endothelial-derived nitric oxide and prostacyclin, and intrinsic factors, such as  
66 immunoreceptor tyrosine-based inhibition motif (ITIM)-containing receptors (Coxon, Geer, & Senis,  
67 2017; Nagy & Smolenski, 2018).

68 G6b-B is a unique platelet ITIM-containing receptor that is highly expressed in mature MKs  
69 and platelets (Coxon et al., 2017; Senis et al., 2007). It is a type I transmembrane protein that  
70 consists of a single N-glycosylated immunoglobulin-variable (IgV)-like domain in its extracellular  
71 region, a single transmembrane domain and a cytoplasmic tail containing an ITIM and an  
72 immunoreceptor tyrosine-based switch motif (ITSM). The central tyrosine residue embedded in  
73 the consensus sequence of the ITIM ([I/V/L]xYxx[V/L]) become phosphorylated by Src family  
74 kinases (SFKs) and subsequently acts as a docking site for the SH2 domain-containing protein-  
75 tyrosine phosphatases (Shp)1 and 2 (Mazharian et al., 2012; Senis et al., 2007). The canonical  
76 mode of action of ITIM-containing receptors is to position these phosphatases in close proximity  
77 to ITAM-containing receptors, allowing them to dephosphorylate key components of the ITAM  
78 signaling pathway and attenuate activation signals. The inhibitory function of G6b-B has been  
79 demonstrated in a heterologous cell system, by antibody-mediated crosslinking of the receptor in  
80 platelets and G6b-B knockout (*KO*) mouse models (Mazharian et al., 2012; Mori et al., 2008;  
81 Newland et al., 2007). Findings from these mice demonstrated that the function of G6b-B goes  
82 beyond inhibiting signaling from ITAM-containing receptors (Mazharian et al., 2013; Mazharian et

83 al., 2012). These mice develop a severe macrothrombocytopenia and aberrant platelet function,  
84 establishing G6b-B as a critical regulator of platelet activation and production. This phenotype  
85 was also observed in a G6b-B loss-of-function mouse model (*G6b* diY/F) in which the tyrosine  
86 residues within the ITIM and ITSM were mutated to phenylalanine residues, abrogating binding  
87 of Shp1 and Shp2 to G6b-B and downstream signaling (Geer et al., 2018). Moreover, expression  
88 of human G6b-B in mouse platelets rescued the phenotype of G6b-B-deficient mice,  
89 demonstrating that human and mouse G6b-B exert the same physiological functions (Hofmann  
90 et al., 2018). Importantly, null and loss-of-function mutations in human G6b-B have been reported  
91 to recapitulate key features of the *G6b* KO and loss-of-function mouse phenotypes, including a  
92 severe macrothrombocytopenia, MK clusters in the bone marrow and myelofibrosis (Hofmann et  
93 al., 2018; Melhem et al., 2016). Despite the vital role of G6b-B in regulating platelet production  
94 and function, its physiological ligand was not known. Although a previous study demonstrated  
95 that G6b-B binds to the anti-coagulant heparin, however, the functional significance and  
96 physiological relevance of this finding have proved elusive (de Vet, Newland, Lyons, Aguado, &  
97 Campbell, 2005).

98 Proteoglycans comprise a heterogeneous family of macromolecules, consisting of a core  
99 protein and associated unbranched glycosaminoglycan (GAG) side-chains. Heparan sulfates  
100 (HS) are a specific subgroup of GAGs, defined by their basic disaccharide unit. They are  
101 structurally-related to heparin, which is produced as a macromolecular proteoglycan by tissue-  
102 resident mast cells (Lassila, Lindstedt, & Kovanen, 1997) and, following chemical or enzymatic  
103 processing, serves as an anti-coagulant (Chandarajoti, Liu, & Pawlinski, 2016; Meneghetti et al.,  
104 2015). One of the best studied HS proteoglycan is perlecan, which is synthesized and secreted  
105 by endothelial and smooth muscle cells into the vessel wall. It is comprised of a large 400 kDa  
106 core protein and has three HS chains attached to its N-terminus. A number of proteins reportedly  
107 interact with the HS chains and protein core of perlecan, among them are structural components  
108 of the ECM, including laminin, collagen IV and fibronectin, and fibroblast growth factor-2 (Nugent,

109 Nugent, Iozzo, Sanchack, & Edelman, 2000; Whitelock, Melrose, & Iozzo, 2008). Of note, the  
110 proteolytically released C-terminal fragment of perlecan, called endorepellin, binds to integrin  
111  $\alpha 2\beta 1$  and enhances collagen-mediated platelet activation (Bix et al., 2007). Perlecan has also  
112 been shown to exert anti-thrombotic properties in an ovine vascular graft model through its HS  
113 side-chains, however the underlying mechanism has not been defined (Lord et al., 2009).

114 In this study, we identified the physiological ligand of G6b-B, the molecular basis of the  
115 G6b-B ligand interactions and the mechanism underlying physiological effects. Our findings  
116 demonstrate that G6b-B binds the HS chains of perlecan, as well as to heparin, eliciting functional  
117 responses in MKs and platelets. Moreover, we also show that a cross-linked, semisynthetic form  
118 of heparin, called anti-platelet anti-coagulant (APAC) (Lassila & Jouppila, 2014), beyond inhibiting  
119 collagen-mediated platelet aggregation, induces robust phosphorylation and downstream  
120 signaling of G6b-B. Collectively, these results reveal that HSs regulate G6b-B signaling and  
121 function, providing a novel mechanism by which MK and platelet function is regulated.

122

123 **RESULTS**

124 **Identification of perlecan as a ligand of G6b-B**

125 To identify the tissue expressing the physiological ligand of G6b-B, we generated a  
126 recombinant G6b-B Fc-fusion protein (mG6b-B-Fc), consisting of the murine G6b-B ectodomain  
127 and the human IgG-Fc tail, to mediate dimer formation, that we used to stain frozen mouse tissue  
128 sections. We consistently observed prominent staining in large vessels, including the vena cava  
129 and aorta, and also in smaller vessels in liver and spleen, not observed with the negative control  
130 (IgG-Fc) (Figure 1), suggesting the presence of G6b-B ligand in the vessel wall.

131 To identify the identity of the ligand we incubated vena cava homogenates with mG6b-B-  
132 Fc and protein G sepharose beads to precipitate G6b-B binding partners. SDS-PAGE and  
133 Colloidal Coomassie staining revealed bands of high molecular weight that were absent in the  
134 negative control (IgG-Fc pulldown, data not shown). Bands were excised and proteins identified  
135 by mass spectrometry, revealing basal membrane-specific HS proteoglycan (HSPG) core protein  
136 or perlecan, as the most abundant protein specifically pulled-down with mG6b-B-Fc (Table 1).

137 The interaction with perlecan was verified using an *in vitro* binding assay, measuring  
138 binding of soluble mG6b-B-Fc to immobilized molecules. mG6b-B-Fc bound robustly to perlecan,  
139 but not to BSA (control) or other ECM molecules, including collagen I and IV, various forms of  
140 laminin (111, 411, 421, 511 and 521), fibronectin or the related and recombinantly expressed  
141 HSPGs syndecan-2 or agrin (Figure 2A). Hence, laminin and collagen identified by G6b-B  
142 pulldown and mass spectrometry (Table 1) most likely represented perlecan-associated proteins  
143 (Battaglia, Mayer, Aumailley, & Timpl, 1992), rather than direct binding partners of G6b-B. Human  
144 G6b-B-Fc (huG6b-B-Fc) showed similar binding characteristics as mG6b-B-Fc (Figure 2A).

145 Treatment of perlecan with the enzyme heparinase III, which removes the HS side-chains,  
146 significantly reduced G6b-B binding to immobilized perlecan (Figure 2B), indicating binding of  
147 G6b-B to the HS side-chains rather than the protein core. This observation was further supported  
148 by a competition assay, in which the addition of soluble HS inhibited the binding of G6b-B to

149 immobilized perlecan (Figure 2C). Of note, unfractionated heparin, which is closely related to HS,  
150 also interfered with G6b-B binding to perlecan and streptavidin-immobilized biotin-conjugated  
151 heparin directly bound to G6b-B-Fc (Figure 2A).

152 To gain further insights into the structural requirements of the G6b-B ligand interaction, we  
153 tested heparin oligomers of different length (4, 8, 12 and 20 saccharide units, dp4, dp8, dp12 and  
154 dp20, respectively) and selectively desulfated heparin molecules for their binding to G6b-B. In a  
155 competition assay, only oligomers of at least 8 saccharides were able to partially block binding of  
156 G6b-B to heparin-biotin, suggesting this to be the minimum length required for this interaction  
157 (Figure 2–figure supplement 1A). In addition, high sulfation of the glycan was found to be  
158 important for G6b-B binding, since a loss in one sulfation site resulted in a significant drop in the  
159 ability to block G6b-B binding to native heparin (Figure 2–figure supplement 1B).

160 Since that the binding assay results suggested that the G6b-B ligand was primarily  
161 composed of HS glycans, we opted to confirm and extend these finding by using a genome-scale  
162 cell-based CRISPR knockout (KO) screening approach, identifying all genes required for the  
163 synthesis and cell surface display of the G6b-B ligand (Sharma, Bartholdson, Couch, Yusa, &  
164 Wright, 2018). We observed that a fluorescently labelled highly-avid recombinant G6b-B binding  
165 reagent robustly stained several human cell lines providing the basis for a cellular genetic screen  
166 (Figure 3A). A genome-wide mutant cell library was generated by transducing Cas9-expressing  
167 HEK293 cells with a library of lentiviruses each encoding a single gRNA from a pool of 90,709  
168 individual gRNAs targeting 18,009 human genes (Sharma et al., 2018). Transduced cells that  
169 had lost the ability to bind to the recombinant protein were isolated using fluorescent-activated  
170 cell sorting and genes required for cell surface binding of G6b-B were identified by comparing the  
171 relative abundance of gRNAs in the sorted versus unsorted control population (Li et al., 2014).  
172 Using this strategy, we unambiguously identified many genes required for HS biosynthesis,  
173 beginning with the generation of the tetrasaccharide linkage on the serine residue of the protein  
174 backbone (*B3GAT3*, *XYLT2*, *B4GALT7*), the commitment towards the HS pathway (*EXTL3*), HS

175 chain polymerization (*EXT1/2*), and HS chain modification (*NDST1*, *HS2ST1*) (Figure 3B). Of  
176 particular note, genes encoding the enzymes chondroitin sulfate N-  
177 acetylgalactosaminyltransferase 1 and 2 (*CSGALNACT1/2*), which are essential for the  
178 commitment towards the biosynthesis of chondroitin sulfate chains were not identified,  
179 demonstrating that G6b-B binding to HEK293 cells is mediated by HS, but not by chondroitin  
180 sulfate (Figure 3B). Moreover, addition of heparin, but not chondroitin sulfate, inhibited G6b-B  
181 binding to HEK293 cells (Figure 3C). We also identified *SLC35B2* (Solute Carrier Family 35  
182 Member B2), a gene encoding a transporter protein that translocates 3'-phosphoadenosine-5'-  
183 phosphosulfate, from the cytosol into the Golgi apparatus, where it is used as a sulfate donor for  
184 sulfation of glycoproteins, proteoglycans, and glycolipids. We validated the involvement of  
185 sulfated HSs in mediating G6b-B binding to cells by individually targeting *SLC35B2* and were able  
186 to demonstrate that this led to a loss in G6b-B binding relative to the parental cell line (Figure 3D).  
187 Together, this genetic screen provides further evidence, corroborating our *in vitro* binding data,  
188 that the physiological ligand of G6b-B is negatively charged HS.

189

### 190 **Molecular basis of G6b-B interaction with HS side-chains of perlecan**

191 The extracellular domain of G6b-B is enriched in positively charged residues, especially  
192 arginines (12 in 125 amino acids; 9.6% vs 5.6% average frequency in mammalian membrane  
193 proteins (Gaur, 2014)) which are known to mediate strong binding to heparin (Margalit, Fischer,  
194 & Ben-Sasson, 1993). Prior to obtaining the crystal structure, we generated a structural model of  
195 G6b-B using template-based tertiary structure prediction (RaptorX Structure Prediction server)  
196 and used this model to aid identification of candidate residues for mutagenesis. Examination of  
197 the model showed four basic residues (Lys54, Lys58, Arg60, Arg61) in close spatial proximity to  
198 each other on a solvent-exposed loop. We tested whether these amino acids are involved in  
199 heparin binding, by generating a mutant G6b-B (K54D, K58D, R60E, R61E; Figure 4-figure  
200 supplement 1A) and comparing heparin binding to WT G6b-B in transiently transfected CHO cells.



201 An anti-G6b-B monoclonal antibody demonstrated robust cell surface expression of mutant G6b-B  
202 that was comparable to that of WT G6b-B, suggesting the quadruple mutation did not disrupt  
203 protein folding or expression (Figure 4–figure supplement 1B). Cells expressing WT G6b-B  
204 showed an increase in heparin binding, as compared to non-transfected cells, while the cells  
205 expressing mutant G6b-B showed minimal binding compared to controls, demonstrating that  
206 these amino acids (or a subset thereof) are required for ligand binding (Figure 4–figure  
207 supplement 1C).

208

### 209 **The crystal structure of the G6b-B ECD-dp12-Fab complex**

210 Subsequent to the tertiary structure prediction, we were able to generate crystals of the  
211 ternary complex of the ectodomain of G6b-B bound to the heparin oligosaccharide dp12,  
212 scaffolded by a G6b-B-specific Fab fragment and determined the structure of this complex by X-  
213 ray crystallography to 3.1 Å resolution (Figure 4 and Table 2). The complex encompasses 6  
214 protein subunits, a dimer of G6b-B and two Fab fragments. As expected for a Fab-scaffolded  
215 structure, crystal packing contacts occur predominantly between the Fab fragment subunits  
216 (Figure 4– figure supplement 2A), but sparse direct contacts between symmetry-related G6b-B  
217 subunits also occurred (Figure 4-figure supplement 2B).

218 Confirming the fold of the predicted model, the ectodomain of G6b-B forms an  
219 immunoglobulin-like fold of a topology closely resembling the structure of a variable  
220 immunoglobulin (Ig) domain (Figure 4C) (Brändén & Tooze, 2009). A disulfide bond between  
221 cysteine residues 35 and 108 (strands B and F, respectively) stabilizes the immunoglobulin (Ig)  
222 fold (Figure 4C). The backbone does not form the canonical strand C'', and only a very short  
223 strand D. In a canonical Ig domain, strand A is part of the sheet formed by strands B–E–D, but  
224 in the case of G6b-B, it is part of the opposite sheet (strands C'–C–F–G). The two G6b-B subunits  
225 (peptide chains E and F in the coordinate set) superimpose closely relative to the core  $\beta$ -sandwich  
226 structure, but divert markedly from each other in the loop connecting strands C' and D (residues

227 66 to 81, Figure 4C). This loop includes several putative O-glycosylation sites (Figure 4D), which  
228 were mutated to Ala to ensure homogenous glycosylation of the protein. However, the O-linked  
229 glycosylation site Thr73 was retained, and electron density shows the presence of three  
230 saccharides attached to Thr73 in both peptide chains (Figure 4 –figure supplement 3). Although  
231 the electron density (resolution 3.1 Å) does not allow one to identify the saccharides  
232 unequivocally, the groups could be modelled as galactose,  $\alpha$ -N-acetyl-D-galactosamine and O-  
233 sialic acid, respectively. These glycosyl groups are well separated from the heparin  
234 oligosaccharide.

235 The ectodomain of G6b-B assembles into an apparent dimer with a pseudo two-fold  
236 symmetry oriented perpendicular to the extended  $\beta$ -sheet that forms the heparin binding site  
237 (Figure 4C). Dimer formation of G6b-B is driven by the heparin ligand, as demonstrated by size  
238 exclusion chromatography (Figure 5). The interface between chains E and F buries  
239 approximately 800 Å<sup>2</sup> of solvent accessible surface area. In line with the modest surface area  
240 buried between the two subunits, the interface analysis using the PISA software does not predict  
241 a stable complex (Krissinel & Henrick, 2007), consistent with the observation that ectodomain  
242 dimerization is induced by the heparin ligand. Non-covalent contacts between the two chains  
243 consist almost entirely of van der Waals (vdW) and hydrophobic interactions, with Trp65<sup>F</sup> and  
244 Pro62<sup>F</sup> positioned centrally in the interface, contacting Pro62<sup>E</sup> and Arg61<sup>E</sup>, while Trp65<sup>E</sup> forms  
245 vdW contacts with Val77<sup>F</sup>. There are very few H-bond interactions (Ser57<sup>E</sup>-O $\gamma$  – Ala66<sup>F</sup>-O/Ala68<sup>F</sup>-  
246 N; Lys58<sup>E</sup>-N $\zeta$  – Arg43<sup>F</sup>-O) across the interface, and notably the central  $\beta$ -sheet (strands C'–C–F–  
247 G–A) is not continuous in that it lacks main chain-main chain hydrogen bonds between the C'  
248 strands of opposing protomers (Figure 4B). Nevertheless, dimerization creates a deep cleft, into  
249 which the heparin ligand inserts (Figure 6A). Crystallization involved a dodeca-saccharide, of  
250 which 8 residues are visible in the electron density map (Figure 6–figure supplement 1), with the  
251 central residues 4 and 5 representing sulfated D-glucosamine (SGN) and L-iduronic acid (IDS),  
252 respectively. While the ligand binding cleft provides partial charge complementarity to the sulfate

253 groups of the heparin ligand (Figure 6A), perhaps surprisingly only one sulfate group (residue  
254 SGN5) forms ionic interactions with basic side-chains (SGN5-O2S – Arg60<sup>F</sup>-N $\epsilon$  3.3 Å, SGN5-  
255 O3S– Lys109<sup>F</sup>-N $\zeta$  3.2 Å, superscript refers to the chain ID, Figure 6B, C). The other 8 polar  
256 contacts (within a distance cut-off of 4 Å) involving sulfate groups are with backbone amides  
257 (Arg60<sup>E</sup>, Glu113<sup>E</sup>, His112<sup>E</sup>, 2.8 – 3.3 Å) rather than side-chains, while 9 residues, including  
258 Lys109<sup>E</sup>, form vdW interactions with the ligand (Figure 6B, C). There is exquisite shape  
259 complementarity between the heparin and the surface of the G6b-B dimer, even though the S-  
260 shaped ligand does only partially fill the ligand binding cleft.

261 We next measured the binding affinities of G6b-B for the various ligands by surface  
262 plasmon resonance. Human G6b-B-Fc-His6 homodimer and human G6b-B-Fc-His6/Fc-  
263 StreptagII heterodimer were used as dimeric and monomeric G6b-B molecules, respectively. In  
264 the configuration with chip-immobilized G6b-B molecules, heparin bound to both, monomeric and  
265 dimeric G6b-B, with high affinity (low nanomolar range). Similar values were obtained for  
266 fractionated (9 kDa) HS, and the 12 saccharide heparin oligomer dp12. The binding affinity of  
267 perlecan was 366-fold weaker than heparin, in the low micromolar range (Table 3 and Figure 7A).  
268 The reverse configuration was also tested, in which ligands were biotinylated and immobilized on  
269 streptavidin chips. Binding avidity of dimeric G6b-B to perlecan, fractionated HS and heparin  
270 were comparable in this configuration (Table 3 and Figure 7A). Interestingly, a clear difference  
271 of monomeric and dimeric G6b-B was observed, with the monomer binding approximately 100-  
272 fold weaker than the dimer (Table 3 and Figure 7B) in line with our crystallography data that ligand  
273 binding induces dimer formation.

274

### 275 **Biological effects of perlecan, heparin and HS on platelets and MKs**

276 Having established HS as ligand for G6b-B, we examined the effect of surface bound  
277 ligand on platelet function, using an *in vitro* platelet adhesion assay, in which human platelets  
278 were incubated on different substrates and their adhesion is quantified colorimetrically. Platelets

279 bound to fibrinogen, as expected, but failed to adhere to perlecan (Figure 8A). However, removal  
280 of the HS side-chains by heparinase III treatment resulted in robust adhesion to perlecan.  
281 Importantly, perlecan also inhibited the adhesion to fibrinogen and collagen when immobilized  
282 together with these substrates. Again, this anti-adhesive effect was abolished upon treatment  
283 with heparinase III (Figure 8A). These results suggest that the HS side-chains of perlecan  
284 negatively regulate platelet adhesion. To determine whether this inhibitory effect perlecan is  
285 mediated via G6b-B, we performed platelet adhesion experiments with platelets from WT and  
286 G6b-B knockout (*G6b*<sup>-/-</sup>; KO) mice (Figure 8B). WT mouse platelets exhibited similar adhesion  
287 characteristics as human platelets, with the exception that they adhered weakly to heparinase III-  
288 treated perlecan (Figure 8B). Platelets from *G6b*<sup>-/-</sup> mice adhered to fibrinogen similar to WT  
289 platelets, however co-coating with perlecan did not inhibit this adhesion, resulting in enhanced  
290 adhesion of *G6b*<sup>-/-</sup> platelets under this condition. Treatment of perlecan with heparinase III  
291 abolished this difference (Figure 8B). Adhesion of WT platelets to collagen was inhibited by  
292 perlecan in a similar manner as human platelets (data not shown). Platelets from *G6b*<sup>-/-</sup> could not  
293 be meaningfully evaluated on collagen, due to the severe reduction in GPVI surface expression  
294 (Mazharian et al., 2012). Collectively, these findings demonstrate that the G6b-B - HS interaction  
295 inhibited the adhesion of platelets to the perlecan protein core, collagen and fibrinogen,  
296 suggesting an inhibitory on integrin and GPVI signaling.

297 We next investigated morphological changes in WT and *G6b*<sup>-/-</sup> platelets adhered to  
298 perlecan by microscopy. WT platelets did not spread on perlecan and were small in size (Figure  
299 8C), however, platelets from *G6b*<sup>-/-</sup> mice spread to a greater extent, indicative for their activation.  
300 This effect was abolished upon heparinase III treatment, demonstrating that HS have an activating  
301 effect on platelets lacking G6b-B. Of note, platelets from *G6b* diY/F mice, which express  
302 physiological levels of a signaling-incompetent G6b-B, recapitulated the enhanced spreading  
303 phenotype of *G6b* KO platelets (data not shown). Hence we conclude that G6b-B signaling is  
304 required to inhibit platelet activation in the presence of HS.

305 Staining of mouse bone marrow sections revealed perlecan expression in vessel walls,  
306 that co-localized with collagen I and the sinusoid marker endoglin (CD105) (Figure 9A). Thus,  
307 MK G6b-B is likely to come into direct contact with HS-side chains of perlecan in sinusoidal  
308 vessels during MK maturation and proplatelet formation (Figure 9A). Investigating the impact of  
309 the G6b-B interaction with HS on MK spreading, we found that very few WT and *G6b*<sup>-/-</sup> MKs  
310 adhered to a perlecan-coated surface formation (Figure 9B). Whilst perlecan adherent WT MKs  
311 were small in size, *G6b*<sup>-/-</sup> MKs spread to a greater degree on the same substrate. The same  
312 effect was observed when perlecan was co-immobilized with fibrinogen and heparinase III  
313 treatment abolished the difference (Figure 9B). Hence, similar to platelets, HS resulted in  
314 increased cell size in the absence of G6b-B, confirming the inhibitory function of this receptor.

315 We next investigated the biological effects of G6b-B ligands on platelet aggregation in  
316 response to collagen, which activates platelets via the ITAM-containing receptor complex GPVI-  
317 FcR  $\gamma$ -chain (Nieswandt & Watson, 2003). Heparin and HS both enhanced platelet aggregation  
318 in response to subthreshold concentrations of collagen (Figure 10). This is in line with previous  
319 reports and may be explained by binding of these ligands to multiple platelet receptors (Gao et  
320 al., 2011; Saba, Saba, & Morelli, 1984; Salzman, Rosenberg, Smith, Lindon, & Favreau, 1980  
321 resulting in an overall aggregation-promoting response. We did not find an effect of perlecan on  
322 collagen-mediated platelet aggregation at concentrations tested, suggesting that perlecan must  
323 be immobilized to surface in order to provide HS chains at a sufficient density to observe the  
324 inhibitory effects observed in adhesion experiments (Figure 8,9). In addition, multiple direct and  
325 indirect effects on platelets via the perlecan protein core, as described previously (Bix et al., 2007),  
326 may mask an effect of the HS chains in this assay.

327 To overcome this limitations we took advantage of the multivalent semisynthetic heparin  
328 proteoglycan mimetic APAC (Lassila & Jouppila, 2014; Lassila et al., 1997) in this assay. APAC  
329 consists of unfractionated heparin covalently coupled to a human albumin core, providing a high  
330 local density of heparin molecules. In contrast to single-chain heparin, APAC dose-dependently

331 inhibited collagen-induced platelet aggregation (Figure 10), with an almost complete block  
332 observed at 0.5  $\mu$ M, as previously described (Lassila & Jouppila, 2014).

333 We next examined the effect of heparin and APAC on WT and G6b-B deficient platelets  
334 using a flow cytometric approach, sufficing much smaller sample volumes than aggregation  
335 assays, using integrin  $\alpha$ IIb $\beta$ 3 activation (fibrinogen-A488 binding) and degranulation-dependent  
336 TLT-1 surface exposure (Smith et al., 2018) as markers for platelet activation. While APAC and  
337 heparin had no detectable effect on WT platelets, APAC induced robust integrin activation and  
338 platelet secretion, demonstrating a platelet-activating effect of this compound in the absence of  
339 G6b-B (Figure 11A and Figure 11-figure supplement 1A). Next we aimed to investigate the impact  
340 of G6b-B ligands on ITAM-mediated platelet activation in WT and *G6b* KO mice. Due to severe  
341 reduction of GPVI receptor levels in G6b-B deficient animals, resulting in a lack of response to  
342 GPVI agonists in this assay (Mazharian et al., 2012), we were not able measure the impact on  
343 GPVI-mediated platelet activation. Therefore, we stimulated platelets with an antibody directed  
344 against the hemi-ITAM receptor CLEC-2, which is expression is not affected by G6b-B deficiency.  
345 APAC, but not heparin, significantly inhibited platelet degranulation in response to CLEC-2 in WT  
346 platelets. Importantly, this inhibitory effect of APAC, was not observed in platelets from G6b-B  
347 deficient animals (Figure 11B), and was also absent in the platelets from G6b-B diY/F mice,  
348 expressing signaling-incompetent form of G6b-B (Figure 11-figure supplement 2). Hence, we  
349 conclude that APAC suppresses CLEC-2-mediated platelet activation by inducing an inhibitory  
350 signal via G6b-B. Of note, fibrinogen binding to CLEC-2-stimulated platelets was significantly  
351 reduced by APAC, in both WT and G6b-B deficient mice, suggesting that APAC might interfere  
352 with fibrinogen binding in this experimental setting (Figure 11-figure supplement 1B). Overall,  
353 these findings demonstrate that multivalent G6b-B ligands inhibit platelet activation via  
354 (hemi)ITAM receptors, while soluble single-chain molecules do not.

355

356

357 **Conjugated heparin induces phosphorylation of G6b-B and downstream signaling**

358 We performed signaling studies, to gain mechanistic insights on the opposing effects of  
359 soluble heparin vs. conjugated heparin. Washed human platelets were incubated with heparin or  
360 APAC, and their lysates were immunoblotted with an anti-phospho-tyrosine antibody (p-Tyr).  
361 Both compounds induced moderate changes in whole cell tyrosine phosphorylation as compared  
362 to collagen, with APAC having a stronger effect (Figure 12A). The most pronounced change  
363 observed in response to G6b-B ligation was an increase in signal intensity of a 150 kDa protein  
364 as well as a doublet in the heparin- and APAC-treated sample migrating at 27 and 32 kDa,  
365 correlating with glycosylated and non-glycosylated human G6b-B. Hence, we assessed the  
366 phosphorylation status of G6b-B using custom phospho-tyrosine-specific G6b-B antibodies,  
367 directed against phosphorylated ITIM and ITSM of G6b-B and by immunoprecipitating the  
368 receptor and blotting with the p-Tyr antibody (Figure 12A and Figure 12–figure supplement 1).  
369 G6b-B was found to be phosphorylated at low levels and have some associated Shp1 and Shp2  
370 in resting platelets, which was enhanced following collagen activation (Figure 12A and Figure 12–  
371 figure supplement 1), as previously reported (Mazharian et al., 2012; Senis et al., 2007). Heparin  
372 and to a greater extent, APAC, induced phosphorylation of G6b-B, accompanied by an increase  
373 in Shp1 and Shp2 association (Figure 12A and Figure 12–figure supplement 1). Similar results  
374 were obtained with HS, but to a lesser extent than either heparin or APAC (Figure 12–figure  
375 supplement 2). Perlecan did not induce phosphorylation of G6b-B, in line with our observation in  
376 the aggregation assay, suggesting that it must be surface-immobilized to have an effect on  
377 platelets (Figure 12–figure supplement 1)

378 Using a quantitative capillary-based gel electrophoresis platform (ProteinSimple Wes), we  
379 investigated the effects of heparin and APAC on the phosphorylation status of the tyrosine  
380 phosphatases Shp1 (pTyr562) and Shp2 (p-Tyr580 and p-Tyr542), which are essential effectors  
381 of G6b-B signaling (Geer et al., 2018). Strikingly, APAC induced prominent phosphorylation of  
382 Shp1 and Shp2, whereas heparin only induced modest changes in Shp2 phosphorylation (Figure

383 12B). We also observed a marginal increase in SFK phosphorylation (p-Tyr418) in platelets  
384 treated with heparin and APAC, correlating with increased phosphorylation of G6b-B under these  
385 conditions (Figure 12B).

386 Subsequently, we compared the effects of heparin and APAC on GPVI signaling in  
387 response to an intermediate concentration of collagen (3 µg/ml). Despite both compounds further  
388 enhancing collagen-induced phosphorylation of G6b-B, and in case of APAC also phosphorylation  
389 of Shp phosphatases (Figure 12B), whole cell phosphorylation remained largely unaltered.  
390 Similarly, we also found no inhibitory effect of heparin or APAC on Src (p-Tyr418) and Syk (p-  
391 Tyr525/6) phosphorylation, both indirect markers of SFK and Syk activation, and critical kinases  
392 for initiating and propagating GPVI signaling (Senis, Mazharian, & Mori, 2014) (Figure 12B).

393 To corroborate that the APAC-induced increase in Shp1 and Shp2 phosphorylation are  
394 mediated by G6b-B, we conducted signaling experiments in platelets from WT and *G6b*<sup>-/-</sup> mice.  
395 APAC treatment of WT platelets recapitulated the effects observed in human platelets, showing  
396 only a modest change in overall phosphorylation pattern, and an increase in Shp1 and Shp2  
397 phosphorylation (Figure 12C, D). In contrast, APAC-induced robust tyrosine phosphorylation in  
398 *G6b*-B-deficient platelets (Figure 12C), indicative of reduced inhibitory signaling and platelet  
399 hyperreactivity the absence of G6b-B. Strikingly this accompanied by reduced tyrosine  
400 phosphorylation of Shp1 and Shp2 in these platelets compared with WT platelets (Figure 12D).  
401 Collectively, these findings demonstrate that heparin and APAC have a direct effect on G6b-B  
402 phosphorylation, however, only the high-density ligand APAC is able to induce robust downstream  
403 inhibitory signaling via G6b-B, culminating in Shp1 and Shp2 binding and tyrosine  
404 phosphorylation.

405

406



407 **DISCUSSION**

408 In this study, we present evidence that establishes G6b-B as a functional receptor of HS and  
409 heparin. Little was known about the effects of GAGs on platelet and megakaryocyte function and  
410 the underlying molecular mechanisms, thus these findings represent a major advance in our  
411 understanding of the interaction, biological and biochemical effects of GAGs on these cells. Using  
412 a mass-spectrometry-based approach and subsequent *in vitro* binding assays, we identified the  
413 HS chains of perlecan as a physiological binding partner of G6b-B. The binding of G6b-B to HS  
414 was corroborated by a cell-based CRISPR KO screening, which identified molecules involved in  
415 the HS synthesis pathway as a prerequisite of G6b-B binding. Two possible explanations why  
416 this assay did not identify perlecan, nor any other individual HSPGs as binding partners of G6b-  
417 B: firstly, the CRISPR screening approach will not identify genes that are essential for cell viability,  
418 and secondly, it will not identify proteins that have redundant functions. Given that perlecan is  
419 secreted from endothelial and smooth muscle cells, it is possible that there could be HSPGs other  
420 than perlecan (syndecans / glypicans) on the cell surface that carry the GAG chains in HEK cells.  
421 Since the molecules in the HS synthesis pathway are essential for their respective synthesis, they  
422 can be identified in this approach more easily. This potential redundancy of HSPGs may also  
423 apply for the situation *in vivo*, and we cannot exclude the possibility that G6b-B may interact with  
424 other HSPGs in the cardiovascular system.

425 As with many other HS-binding molecules, G6b-B also binds structurally-related heparin  
426 (Xu & Esko, 2014). Indeed, the interaction between heparin and G6b-B had been described  
427 previously, but molecular details of the interaction and their functional significance had not been  
428 determined (de Vet et al., 2005). Our size exclusion chromatography data demonstrate that  
429 dimerization of G6b-B is induced by the heparin ligand. The crystal structure of heparin-bound  
430 G6b-B reveals the mode of ligand binding and how binding of this ligand induces ectodomain  
431 dimerization. The contact surfaces between the G6b-B dimer and the Fab fragments are spatially  
432 separated from the heparin binding site, suggesting that the presence of the Fab fragments does

433 not interfere with heparin binding. Heparin-dependent, non-constitutive dimerization of G6b-B is  
434 consistent with the small interface between the G6b-B subunits and the absence of main chain-  
435 main chain hydrogen bonds across the  $\beta$ -sheet of the binding surface. Among 34 entries currently  
436 in the PDB of structures containing heparin as ligand, dimeric assemblies (or multimeric  
437 assemblies with a 2-fold rotation axis) are common (Supplemental Figure 1), but the anti-parallel  
438 alignment of 2 Ig-like domains in the heparin-bound structure of G6b-B appears to be unique (Cai  
439 et al., 2015; Dahms, Mayer, Roeser, Multhaup, & Than, 2015; Fukuhara, Howitt, Hussain, &  
440 Hohenester, 2008; Pellegrini, Burke, von Delft, Mulloy, & Blundell, 2000; Schlessinger et al.,  
441 2000). The involvement of the  $\beta$ -sheet surface in heparin binding is somewhat reminiscent of  
442 how carbohydrate-binding modules (CBM) bind saccharide ligands (Abbott & van Bueren, 2014).  
443 CBMs are non-enzymatic domains often associated with carbohydrate active enzymes,  
444 contributing to carbohydrate binding and discrimination (Boraston, Bolam, Gilbert, & Davies,  
445 2004).  
446 The crystal structure of G6b-B shows a prominent positively charged electrostatic surface area,  
447 but this positive surface patch runs perpendicular to the central cleft of the G6b-B dimer. Indeed,  
448 the heparin oligosaccharide lines up with the cleft, rather than extending along the positive surface  
449 patch. Comparison with other heparin-bound structures (Supplemental Figure 1) suggests that  
450 charge complementation is not the sole determinant of the mode of heparin binding, but that depth  
451 and shape of the docking site are likely to be important as well. Nevertheless, charge  
452 complementing ionic interactions lock the ligand into register at the center of the G6b-B binding  
453 cleft, whereby the utter sparsity of sulfate-Arg or sulfate-Lys interactions is surprising. The crystal  
454 structure rationalizes the diminished binding of G6b-B transfected HEK293 cells to biotinylated  
455 heparin when the four basic residues Lys54, Lys58, Arg60 and Arg61 are simultaneously mutated.  
456 Among these four side-chains, the key interaction appears to be with Arg60, as Arg61 is shielded  
457 through G6b-B dimerization from the ligand, Lys54 is well separated from the binding cleft, whilst  
458 Lys58 is situated within a 4 Å-radius of heparin, but makes no polar interactions. The heparin

459 ligand does not exhaust the possibilities for specificity-determining interactions with G6b-B in the  
460 ligand-binding cleft. For instance, Arg60<sup>F</sup>, Lys109<sup>F</sup> are involved in ionic interactions with the same  
461 sulfate group, but not their counterparts in chain E on the opposite side of the cleft. It is  
462 conceivable that the physiological HS ligand of G6b-B may have a different pattern of sulfate  
463 groups that engage both pairs of Arg60, Lys109, perhaps in addition to Lys58.

464 Investigating the functional consequences of this interaction revealed that heparin and HS  
465 have complex effects on platelet function and that G6b-B is a key regulator in this process. Our  
466 data demonstrates that, to induce robust inhibitory biological or signaling effects, G6b-B ligands  
467 either need to be immobilized to a surface, as in the case of perlecan-coated plates, or multivalent,  
468 as in the case of APAC. In contrast, single chain heparin and HS enhanced rather than inhibited  
469 platelet aggregation. These findings are in line with numerous previous reports, showing  
470 enhancing effects of heparin on platelet aggregation in platelet-rich plasma (Gao et al., 2011;  
471 Saba, Saba, & Morelli, 1984; Salzman, Rosenberg, Smith, Lindon, & Favreau, 1980). This most  
472 likely also contributes to a mild drop in platelet counts in patients receiving heparin, referred to as  
473 non-immune heparin-induced thrombocytopenia (Cooney, 2006). Based on our signaling data  
474 and size exclusion chromatography data, we assume that heparin, despite being able to dimerize  
475 the receptor, fails to cluster G6b-B sufficiently into higher-order oligomers to induce robust  
476 downstream signaling (Figure 13A, B). It remains to be determined, whether the enhancing  
477 effects of heparin and HS on platelet aggregation is mediated by inhibiting inhibitory effects of  
478 G6b-B alone, or by additional effects on other platelet receptors, which promote platelet activation,  
479 such as the integrin  $\alpha\text{IIb}\beta\text{3}$ , previously shown to bind heparin (Fitzgerald, Leung, & Phillips, 1985;  
480 Gao et al., 2011; Sobel et al., 2001).

481 In contrast to these soluble, monovalent ligands, the HS of immobilized perlecan exerted  
482 an inhibitory effect on platelets, as evidenced by impaired adhesion of platelets to collagen and  
483 fibrinogen. This extends observations from previous reports describing the anti-adhesive  
484 properties of the HS chains of perlecan, although the underlying mechanism was not known

485 (Klein, Conzelmann, Beck, Timpl, & Muller, 1995; Lord et al., 2009). Moreover, heparinized  
486 polymers showed less platelet adhesion than their non-heparinized counterparts (Han, Jeong, &  
487 Kim, 1989; Lindhout et al., 1995; Olsson, Lagergren, Larsson, & Radegran, 1977). Our results  
488 with platelets from G6b-B-deficient mice demonstrate that heparin or HS engagement by G6b-B  
489 on these surfaces induce an inhibitory signal, blocking platelet activation and adhesion.

490 The failure of perlecan in solution to have any effect on collagen-mediated platelet  
491 aggregation and platelet signaling, suggests that perlecan must be immobilized to surface in order  
492 to provide HS chains at a sufficient density to induce the inhibitory effects observed on platelet  
493 adhesion. To determine the effect of G6b-B clustering in solution, we took advantage of APAC,  
494 which mimics naturally occurring macromolecular heparin proteoglycans and harboring a higher  
495 GAG density than perlecan. Similar to previous reports (Kauhanen, Kovanen, & Lassila, 2000;  
496 Lassila & Jouppila, 2014; Lassila et al., 1997), we found that APAC inhibited platelet activation  
497 via the ITAM-containing GPVI-FcR  $\gamma$ -chain receptor complex, but also towards the hemi-ITAM-  
498 containing receptor CLEC-2. Thus, by increasing the clustering capacity of heparin to a  
499 multivalent form, an inhibitory effect on platelet function was achieved in solution. In line with this  
500 observation, we found that APAC induced stronger phosphorylation of G6b-B, which was  
501 accompanied by association and phosphorylation of the tyrosine phosphatases Shp1 and Shp2,  
502 not observed in G6b-B-deficient platelets. We therefore conclude, that clustering of G6b-B  
503 receptor dimers into higher-order oligomers by an immobilized or multivalent ligand is required to  
504 have an inhibitory effect on platelet function (Figure 13C)

505 Perlecan is secreted by endothelial and smooth muscle cells into the extracellular space  
506 of the vessel wall and hence inaccessible by platelet G6b-B in an intact blood vessel (Murdoch,  
507 Liu, Schwarting, Tuan, & Iozzo, 1994; Saku & Furthmayr, 1989; Segev, Nili, & Strauss, 2004).  
508 Only upon vascular injury will the interaction between platelet G6b-B and perlecan occur. Given  
509 the results of our adhesion assay, we speculate that the interaction of platelet G6b-B with perlecan  
510 negatively regulates the initial steps of thrombus formation, preventing thrombi from forming

511 unnecessarily. Our results also demonstrated that platelets and MKs from G6b-B-deficient mice  
512 showed an activation response towards the HS chains of immobilized perlecan and, in case of  
513 platelets, also towards APAC, even in the absence of a classical platelet agonist such as collagen.  
514 Hence, one of the key functions of G6b-B *in vivo* may not solely be restricted to inhibit platelet  
515 function upon vascular injury, but also to retain platelets in a resting state. Notably, the HSPGs  
516 syndecan-1 and -4 expressed on the surface of endothelial cells that form an integral part of the  
517 glycocalyx (Marki, Esko, Pries, & Ley, 2015). As platelets marginate to the vessel wall, the  
518 interaction of G6b-B on circulating platelets with the glycocalyx may induce a low level inhibitory  
519 signal helping to maintain platelets in an inactive state, in line with basal phosphorylation of G6b-B  
520 in resting platelets.

521 The G6b-B-HS interaction may also be relevant for triggering directional formation of  
522 proplatelets by MKs towards sinusoidal blood vessels at sites of platelet production. A key yet  
523 unresolved question is how MKs remain relatively refractory and do not release platelets into the  
524 ECM-rich environment of the bone marrow despite expressing the same repertoire of cell-surface  
525 receptors as platelets. G6b-B is highly expressed in mature MKs and G6b-B KO and loss-of-  
526 function mice show a severe macrothrombocytopenia due to impaired proplatelet formation and  
527 platelet production (Geer et al., 2018; Mazharian et al., 2012). Here we have demonstrated that  
528 G6b-B-deficient, but not WT MKs increase their size in the presence of perlecan, indicative of  
529 cellular activation. This is also in line with our observation of large clusters of atypical MKs in the  
530 bone marrow of G6b-deficient patients (Hofmann et al., 2018). In addition, our and previous  
531 findings show that perlecan is abundantly expressed in the bone marrow ECM and comes into  
532 contact with mature MKs ((Farach-Carson, Warren, Harrington, & Carson, 2014), raising the  
533 possibility that the MK G6b-B-HS interaction plays a critical role in regulating polarized proplatelet  
534 formation into sinusoidal blood vessels.

535            In summary, our findings establish the interaction of G6b-B with heparan sulfate as a novel  
536 mechanism regulating platelet reactivity, as well as having important implications in the regulation  
537 of platelet production and the adverse effects observed upon soluble heparin administration.

538

539 **EXPERIMENTAL PROCEDURES**

540

541 **Mice**

542 *G6b* (*G6b*<sup>-/-</sup>) and *G6b* *diY/F* KI (*G6b*<sup>diYF/diYF</sup>) mice were generated on a C57BL/6 background by  
543 Taconic Artemis (Cologne, Germany) as previously described (Geer et al., 2018; Mazharian et  
544 al., 2012). Control mice were pure C57BL/6 (*G6b*<sup>+/+</sup>), referred to as WT. All procedures were  
545 undertaken with the U.K. Home Office approval in accordance with the Animals (Scientific  
546 Procedures) Act of 1986.

547

548 **Reagents and antibodies**

549 Perlecan (heparan sulfate proteoglycan), biotinylated heparin, p-nitrophenyl phosphate (pNPP),  
550 mouse laminin 111, fibronectin, streptavidin, anti-actin (A4700) and anti-tubulin antibody (T6199)  
551 and goat anti-human IgG–HRP antibodies were obtained from Sigma-Aldrich, Dorset, UK.  
552 Heparinase III was from AMSBiotechnology, Abingdon, UK. Heparan sulfate, fractionated  
553 heparan sulfate, heparin, selectively desulfated heparins and heparin oligomers (degree of  
554 polymerization -dp) were from Iduron, Alderley Park, UK. The semisynthetic macromolecular  
555 conjugate of unfractionated heparin and a human serum albumin, APAC, was from Aplagon Oy,  
556 Helsinki, Finland. Purified human IgG-Fc fragment (IgG-Fc) was from Bethyl Laboratories,  
557 Montgomery, Texas, USA. Fibrinogen was from Enzyme Research, Swansea, UK recombinant  
558 human agrin (N-terminal part; Thr30-Arg1102) and recombinant mouse syndecan-2 from R&D  
559 Biotechnologies, Abingdon, UK. Recombinant human laminins were obtained from Biolamina,  
560 Sundbyberg, Sweden. Blocking medium (2.5 % horse serum) and 3,3'-diaminobenzidine  
561 tetrahydrochloride (DAB) Peroxidase substrate for immunohistochemistry were purchased from  
562 Vector Laboratories, Peterborough, UK and 3,3,5,5-tetramethylbenzidine (TMB) was from BD  
563 Biosciences, Wokingham, UK. Polyclonal anti-Shp1 and anti-Shp2 antibodies were from Santa  
564 Cruz Biotechnology, Heidelberg, Germany. Polyclonal phospho-specific G6b-B antibodies were

565 generated by Biogenes, Berlin, Germany. Rabbit monoclonal anti-Shp1 p-Tyr564 (D11G5), anti-  
566 GAPDH (14C10) and rabbit polyclonal anti-Shp2 p-Tyr542, anti-Shp2 p-Tyr580, anti-Syk p-  
567 Tyr525/6 antibodies were from Cell Signaling Technology, Leiden, The Netherlands. Rabbit  
568 polyclonal anti-Src p-Tyr418 antibody and phalloidin-Alexa 488 was from Invitrogen Life  
569 Technologies, Paisley, UK and anti-phosphotyrosine (4G10) from Millipore, Watford, UK. All other  
570 antibodies and chemicals were either purchased or generated as previously described  
571 (Mazharian et al., 2012).

572

### 573 **Constructs**

574 *Recombinant proteins:* The cDNA encoding the mouse G6b-B extracellular domain was amplified  
575 by PCR using the primers GATC AAGCTT ATG GCC TTG GTC CTG CCG CTG (forward) and  
576 GATC GGATCC ACT TAC CTG T CTC GTA CCC GTG GGT AGA TCC (reverse) from a mouse  
577 megakaryocyte cDNA library template. The PCR product was cleaved using Hind III and Bam HI  
578 and ligated into pCDNA3Ig, comprised of the genomic human IgG1 hinge-C2-C3 Fc region cloned  
579 into the HindIII and Not I sites of pcDNA3. This creates a construct encoding the extracellular  
580 part of G6b, spliced in frame with the IgG1 hinge, producing a G6b-B-Fc chimeric dimer. The  
581 resulting protein, mG6b-B-Fc, was expressed in COS-7 cells and then purified via affinity  
582 chromatography. The human G6b-B-Fc dimer (hG6b-B-Fc) construct was produced using an  
583 identical approach to the murine construct, using the primers GATC AAGCTT ATG GCT GTG  
584 TTT CTG CAG CTG (forward) and GATC GGATCC ACTTACCTGT CTG GGG ATA CAC GGA  
585 CCC ATG (reverse). Similarly, untagged monomeric G6b-B (residues 18-142) as well as His-  
586 tagged versions were produced – human G6b-B (residues 18-142)-Fc-His6 (expressed as a  
587 homodimer) and human G6b-B (residues 18-142)-Fc-His6/Fc-streptagII (heterodimer, monomeric  
588 for G6b-B; Peak Proteins Limited, Alderley Park) for use in surface plasmon resonance  
589 measurements. All human constructs were expressed transiently in HEK293-6E cells.



590 *Cell culture:* The cDNA encoding the full length of human G6b-B protein was amplified by PCR  
591 from a human cDNA library. This PCR fragment was first cloned into the pCR®-Blunt vector  
592 (Invitrogen), and then subcloned into the pCDNA3 vector, for expression of untagged G6b-B in  
593 heterologous cell systems. Subsequently, the G6b-B mutant with mutation in the potential heparin  
594 binding site (hG6b-B K54D/K58D/R60E/R61E referred to as hG6b-B-mut) was generated with the  
595 Quick Change Site-directed mutagenesis kit (Agilent Technologies, Stockport, UK).

596

### 597 **Immunohistochemistry**

598 Immunohistochemistry stainings were performed according to standard protocols. In brief, frozen  
599 mouse tissue sections (Zyagen, San Diego, CA, UK) were thawed and washed once in phosphate  
600 buffered saline (PBS). After blocking for 20 minutes (min) at room temperature (RT), tissues were  
601 incubated with mG6b-B-Fc or human IgG-Fc fragment (negative control, 5 µg/ml in PBS) for 75  
602 min at RT. After three washing steps in PBS, slides were fixed in acetone/PFA for 4 min and  
603 endogenous peroxidase was blocked with 3% H<sub>2</sub>O<sub>2</sub> in methanol (5 min). Slides were incubated  
604 with anti-human IgG–HRP antibody (1:600 in PBS, 0.1% Tween 20) and the signal developed  
605 with DAB substrate. Subsequently, tissue sections were counterstained with hematoxylin.  
606 Images were acquired on a Zeiss Axio Scan.Z1 (Zeiss, Cambridge, UK) equipped with an 3CCD  
607 color 2MP Hitachi 1200x1600 HV-F202SCL camera, using a 10x (NA 0.45) or 20x (NA 0.8) plan  
608 apochromat air objective. Images were acquired and exported with the Zeiss Zen software.

609

### 610 **Femur sectioning and staining**

611 Femurs of mice aged 6–12 weeks were sectioned and stained as described previously  
612 (Kawamoto, 2003; Semeniak et al., 2016). In brief, megakaryocytes were stained with anti-GPIX  
613 antibody (emfret analytics, Eibelstadt, Germany), CD105 (eBioscience) was used as an  
614 endothelial cell marker. Additional stainings were performed using antibodies against perlecan  
615 (Santa Cruz). Corresponding secondary antibodies detecting IgG of rat, goat, rabbit or mouse

616 were purchased as conjugates with Alexa Fluor 488 (A-11034), 594 (A-11007) or 647 (A-21247,  
617 A-21469, A-21244), respectively, from Life Technologies, Darmstadt, Germany, and used at a  
618 1:300 dilution. Slides were mounted in DAPI-containing medium (Southern Biotech, Birmingham,  
619 AL, USA). Recording was performed at a Leica TCS SP8 confocal laser scanning microscope  
620 (Leica, Wetzlar, Germany) with an 40x oil objective at 20°C. Numerical aperture (NA) of the  
621 objective lense was 1.3 and the software used for data acquisition was LASX. Subsequently  
622 images were processed with ImageJ (NIH, Bethesda, MD, USA). No 3D reconstruction, gamma  
623 adjustments or deconvolution were performed.

624

#### 625 **Pull-down and identification of the ligand**

626 Venae cavae were dissected from wild-type mice and fat and connective tissue were removed.  
627 The endothelial tissue was placed in lysis buffer (10 mM Tris-HCl, pH 7.6, 150 mM NaCl, 1 mM  
628 EGTA, 1 mM EDTA, 1% IGEPALCA-630, 5 mM Na<sub>3</sub>VO<sub>4</sub>, 0.5 mM 4-(2-aminoethyl)  
629 benzenesulfonyl fluoride hydrochloride, 5 µg/ml leupeptin, 5 µg/ml aprotinin, 0.5 µg/ml pepstatin)  
630 and homogenized with a PowerGen homogenizer (Fisher Scientific, Loughborough). Lysates  
631 were centrifuged at 13,000 ×g for 10 minutes at 4°C. Supernatants were collected and re-  
632 centrifuged under the same conditions. Protein lysate was precleared with Protein G sepharose  
633 (PGS, 50% slurry) and human IgG-Fc fragment by agitation for 1 h at 4°C. The lysate was then  
634 split into two samples which received either mG6b-B-Fc or human IgG-Fc fragment (negative  
635 control). After 1.5 h PGS was added and samples were agitated for another 1.5 h at 4°C. Finally,  
636 PGS was washed three times in lysis buffer and bound proteins were eluted by boiling the PGS  
637 pellet for 5 min in 40 µl 2x SDS sample buffer. Samples were then resolved on a NuPage 4-12%  
638 Bis-Tris-Gradient Gel (Invitrogen), alongside with mG6b-B-Fc (additional negative control) and  
639 stained with colloidal Coomassie. Bands appearing in the mG6b-B-Fc pulldown, but not in the  
640 negative controls, were excised and subjected to mass spectrometry analysis (Orbitrap, Thermo

641 Fisher Scientific, Paisley, UK). Corresponding areas from the control pulldown were cut and  
642 analyzed in parallel to account for background signals.

643

#### 644 ***In vitro* binding assay**

645 Nunc MaxiSorp™ plates (Thermo Fisher Scientific) were coated overnight with 50 µl of substrates,  
646 diluted in PBS (supplemented with 0.9 mM CaCl<sub>2</sub> and 0.5 mM MgCl<sub>2</sub> for laminins) at a  
647 concentration of 5 µg/ml. Plates were washed 3 times with Tris buffered saline (TBS) containing  
648 0.1% Tween 20 (TBS-T) and blocked for 1.5 h at 37°C with 2% fat free milk in TBS, 0.02% Tween  
649 20. For heparin immobilization, biotinylated heparin (5 µg/ml) was added to streptavidin-coated  
650 wells for 1 h at RT prior to the blocking step. After one washing step, recombinant G6b-B-Fc or  
651 human IgG-Fc fragment (negative control) in 3% BSA in TBS-T was added and incubated for 2 h  
652 at 37°C. In competition assays, this incubation step was performed in the presence of the  
653 indicated compound. After five washing steps, wells were incubated with HRP-conjugated anti-  
654 human IgG antibody for 1 h at RT at low agitation. Alternatively, monomeric, untagged G6b-B  
655 was incubated with anti-G6b-B antibody and bound complexes were detected with HRP-  
656 conjugated anti-mouse IgG antibody. Plates were washed seven times and signals were  
657 developed with TMB. The reaction was stopped by addition of 2 M H<sub>2</sub>SO<sub>4</sub> (50 µl/well) and  
658 absorbance at 450 nm and 570 nm (background) was measured with a Versa max plate reader  
659 (Molecular Devices, Wokingham, UK).

660

#### 661 **Genome-wide cell-based genetic screening**

662 The cell-based genome-wide genetic screen was performed essentially as described (Sharma et  
663 al., 2018). In brief, 3x10<sup>7</sup> Cas9-expressing HEK293 cells were transduced with a library of  
664 lentiviruses each encoding a single gRNA from a pool of 90,709 individual gRNAs targeting  
665 18,009 human genes at a low multiplicity of infection of 0.3 to increase the chances that each cell  
666 received a single gRNA. Ten million lentivirally transduced cells were selected using a blue

667 fluorescent protein (BFP) marker three days after transduction using fluorescence-activated cell  
668 sorting. The sorted cells were placed back into culture and further selected for five days with 2  
669  $\mu\text{g/mL}$  puromycin. On day nine post transduction,  $100 \times 10^6$  cells were stained with a recombinant  
670 protein consisting of the entire ectodomain of biotinylated human G6b-B clustered around  
671 phycoerythrin (PE)-conjugated streptavidin for an hour at room temperature. The cells were  
672 sorted using an XDP flow sorter and the BFP<sup>+</sup>/PE<sup>-</sup> population collected, representing ~1% of the  
673 total cell population. A total of 600,000 cells were collected from which genomic DNA was  
674 extracted, gRNA sequences amplified by PCR and their abundances determined by next  
675 generation sequencing. The enrichment of gRNA sequences targeting specific genes in the  
676 sorted versus unsorted populations were quantified from the sequence data using the MAGeCK  
677 software (Li et al., 2014) as previously described (Sharma et al., 2018).

678

#### 679 **Surface Plasmon resonance**

680 The interaction of the recombinant heterodimeric ('monomer') and homodimeric ('dimer') human  
681 G6b-B extracellular domain with different ligands was quantified using a BIAcore™ 8K  
682 instrument (GE Healthcare, Little Chalfont, UK). Recombinant G6b-B proteins were immobilized  
683 on CM5 sensor chips (GE Healthcare) via an Fc antibody using the Human Antibody Capture Kit  
684 (GE Healthcare). Immobilization levels ranged from 7,800-9,000 response units (RU) for the Fc  
685 antibody and 3000 to 4000 RU for the G6b-B proteins. Single cycle kinetics (SCK) measurements  
686 were undertaken with perlecan, heparin, fractionated HS and dp12. The analytes were injected  
687 in increasing concentrations of 0.1, 1, 10, 100 and 1,000 nM. Analytes were flowed over the  
688 immobilized G6b-B surface at 30  $\mu\text{l/min}$  with 60 s injection time and 60 s dissociation per  
689 concentration. In the 'reversed configuration', biotinylated heparin, HS and perlecan were  
690 immobilized on streptavidin sensor chips (GE Healthcare); fractionated HS and perlecan were  
691 biotinylated using the Lightning-Link® Biotinylation kit (Innova Biosciences, Cambridge, UK).  
692 Immobilization levels of the biotinylated species were between 900 and 1000 RU. SCK of

693 'monomeric' and 'dimeric' G6b-B were evaluated at 0.05, 0.5, 5, 50 and 500 nM. The analytes  
694 were flowed over the immobilized peptides at 10  $\mu$ l/min with 180 s injection time and 360 s  
695 dissociation at each concentration. Data were collected from two replicates per experiment type  
696 and analyzed using the BIAevaluation software (GE Healthcare). Sensorgrams were double  
697 referenced prior to global fitting the SCK sensorgrams to one-to-one binding models for  
698 determining the rate constant of association ( $k_{on}$ ) and dissociation ( $k_{off}$ ). Binding affinities ( $K_D$ )  
699 were calculated from the equation  $KD = k_{off}/k_{on}$ .

700

### 701 **Theoretical modeling of G6b-B structure**

702 The G6b-B ectodomain model was generated by submitting the amino acid sequence for G6b-B  
703 residues 18-142 to the RaptorX Structure Prediction server (<http://raptorx.uchicago.edu/>)  
704 (Kallberg et al., 2012). Subsequent modelling of the K54D, K58D, R60E, R61E G6b-B mutant  
705 and all molecular graphics figure generation was carried out using PyMOL (The PyMOL Molecular  
706 Graphics System, Version 2.0 Schrödinger, LLC.). The electrostatic surfaces of both wild-type  
707 and mutant G6b-B models were calculated using the APBS suite (Jurrus et al., 2018).

708

### 709 **Crystallography**

710 *Production of recombinant G6b-B and anti-G6b-B Fab fragment.* The G6b-B extracellular domain  
711 (ECD) construct encompassing residues 18-133 including the mutations N32D, S67A, S68A,  
712 S69A, T71A was expressed in mammalian HEK293 cells and purified by cation exchange and  
713 size exclusion chromatography. The recombinant anti-G6b-B Fab fragment was also produced  
714 in HEK cells, synthetic genes for light and heavy chains were obtained from Invitrogen GeneArt.  
715 The G6b-B ECD-Fab complex was formed by incubating the components together for 2 hours at  
716 room temperature with G6b-B ECD in a 1.5 molar excess, and the complex was subsequently  
717 purified by size exclusion chromatography. Protein was concentrated to 12 mg/ml in 20 mM

718 Hepes pH 7.1, 75 mM NaCl and finally incubated with 2 mM (10-fold molar excess) of the heparin  
719 oligosaccharide dp12 for 1 hour at 4°C prior to setting up the crystallization experiment.

720

721 *Production of crystals and solving of structure.* Crystals were grown by vapor diffusion at 20°C in  
722 50 mM MES pH6.2, 10% PEG 550MME, 5% v/v glycerol, and 50 mM CaCl<sub>2</sub> and appeared within  
723 3 days. Crystals were harvested straight out of the growth drop and cryo-cooled in liquid nitrogen.  
724 X-ray diffraction data were collected at 100K on beamline I03 at Diamond Light Source and  
725 processed using XDS (Kabsch, 2010) and Aimless (Evans & Murshudov, 2013) via AutoPROC  
726 (Vonrhein et al., 2011). The crystal were in space group C2 with the cell dimensions of a=183.80  
727 Å, b=72.34 Å, c=131.04 Å, β=124.52°, and extended to 3.1 Å resolution (Table 3).

728 The structure was initially solved by molecular replacement using the program Phaser  
729 (McCoy et al., 2007) and with a model of the Fab fragment generated from the PDB structure  
730 4K2U (Chen, Paing, Salinas, Sim, & Tolia, 2013) as the search model. This resulted in the  
731 placement of two Fab molecules in the asymmetric unit (Phaser Z-score after translation  
732 search=10.2). Examination of the resulting electron density maps showed substantial unmodeled  
733 density in the vicinity of the CDR regions of both Fab molecules, which was interpreted as bound  
734 G6b-B ECD. Multiple rounds of model building in Coot (Emsley & Cowtan, 2004) and refinement  
735 using Refmac5 (Murshudov, Vagin, & Dodson, 1997) resulted in a model encompassing about  
736 90% [101 out of 116 residues] of the of G6b-B ECD chain. Residual density at that stage was  
737 identified as a single molecule of heparin dp12 bound, with the density covering 8 of the 12  
738 saccharide units in dp12.

739 The final model represents a complex of G6b-B ECD, dp12 and Fab fragment chains in  
740 the ratio 2:1:2 respectively. The refined structure of G6b-B ECD chain has observable electron  
741 density for residues Pro19 to Thr38, Arg43 to Arg83 and Ile91 to Cys129. The G6b-B ECD as  
742 expected is shown to be a member of the IgV superfamily with the solved structure comprises  
743 two antiparallel β-sheets formed by strands ABDE and A'CC'FG. There is also evidence from the

744 electron density for O-linked glycosylation at Thr73 in both copies of the G6b-B ECD. Final  
745 refinement statistics for the G6b-B ECD-dp12-Fab dimer complex are given in Table 3.

746

#### 747 **Size chromatography of G6b-B ECD**

748 The G6b-B ECD protein encompassing residues 18-133 (N32D, S67A, S68A, S69A, T71A) was  
749 either analyzed immediately, or after incubation with heparin oligosaccharide dp12. A Superdex  
750 75 10/300 GL column (GE Healthcare) was both equilibrated and run in 20 mM Hepes, pH 7.1,  
751 75 mM NaCl. dp12 was added to the G6b-B ECD at a 4-fold molar excess (150  $\mu$ M final  
752 concentration). After the addition of dp12 the sample was aspirated gently and incubated for 90  
753 min on ice, prior to SEC analysis. Columns were run at 0.3 ml/min, and 400  $\mu$ l of G6b-B ECD  
754 samples loaded (200  $\mu$ g). A calibration curve was prepared in the same buffer using conalbumin  
755 (75 kDa), ovalbumin (44 kDa), carbonic anhydrase (29 kDa), ribonuclease A (13.7 kDa) and  
756 aprotinin (6.6 kDa) (LMM gel filtration standard kit, GE Healthcare). This calibration curve was  
757 then used to estimate the molecular weight of both G6b-B ECD and G6b-B ECD +dp12 in order  
758 to determine their polymeric states.

759

#### 760 **Flow-cytometric analysis of heparin binding transfected CHO cells**

761 Transfections of WT or mutant hG6b-B into CHO cells were carried out in 6-well plates ( $3 \times 10^5$   
762 cells in 2 ml DMEM medium, supplemented with 10% fetal bovine serum, 2 mM glutamin) using  
763 polyethylenimine (Sigma-Aldrich) as described (Ehrhardt et al., 2006). Cells were harvested 2  
764 days after transfection, by detaching them with accutase, and resuspended in PBS containing 0.2  
765 mg/ml BSA and 0.02% sodium azide. Cells were incubated with heparin-biotin (10  $\mu$ g/ml) and  
766 mouse anti-human G6b-B antibody for 45 min at RT, washed twice, and incubated with  
767 streptavidin-PE (BD Biosciences) and anti-mouse-alexa488 antibody (Invitrogen). Cells were  
768 fixed with 1% formaldehyde and analyzed on a BD FACSCalibur (BD Biosciences).

769

770 **Aggregometry**

771 Platelet rich plasma (PRP) was prepared from blood collected from healthy drug-free volunteers  
772 as described previously (Dawood, Wilde, & Watson, 2007). Donors gave full informed consent  
773 according to the Helsinki declaration. In brief, 9 volumes of blood were collected into 1 volume of  
774 4% (w/v) sodium citrate solution. Blood was centrifuged at 200 ×g for 20 min at RT and PRP was  
775 collected. Platelet aggregation was measured using a lumi-aggregometer (Chrono-Log,  
776 Abbingdon On Thames, UK, Model 700).

777

778 **Platelet adhesion assay**

779 This assay was performed as described previously (Bellavite et al., 1994). In brief, Nunc  
780 MaxiSorp™ plates were coated overnight with 50 µl of substrates, diluted in PBS at a  
781 concentration of 10 µg/ml, except for collagen which was used at 2.5 µg/ml. Plates were then  
782 washed 3 times and blocked with 2% BSA in PBS for 1 h at 37°C. After washing, 50 µl heparinase  
783 III (5 mU/ml) or buffer (20 mM Tris-HCl, pH 7.5, 0.1 mg/ml BSA and 4 mM CaCl<sub>2</sub>) were added to  
784 each well and incubated for 1.5 h. After three washing steps, 50 µl of platelet suspension modified  
785 Tyrode's buffer, prepared as previously described (Pearce et al., 2004), at a concentration of  
786 1×10<sup>8</sup>/ml were added and incubated for 1 h at 37°C. After three washing steps with PBS, 140 µl  
787 of substrate solution was added to each well and incubated on a rocker at RT for 40 minutes.  
788 Then 50 µl of 3M NaOH was added and the signal was quantified 5 minutes later by measuring  
789 the absorbance at 405 nm and 620 nm (background). Percentage of adhesion was calculated by  
790 normalizing the measured ODs to the signal obtained by directly lysing 50 µl of platelet  
791 suspension.

792

793 **Flow cytometric analysis of platelet activation**

794 5 µl staining solution, containing 1.5 µg fibrinogen-Alexa488 conjugate (Invitrogen) and 1 µg of  
795 anti-TLT-1-Alexa 647 antibody (Biotechnie, Abingdon, UK) and 5 µl of whole blood were provided



796 in a well of 96-well plate. Stimulation was started by adding 40 µl of heparin, APAC (0.05 µM final  
797 concentration) or buffer, with or without CLEC-2 antibody (3 µg/ml final concentration; Bio-Rad,  
798 Oxford, UK). The plate was incubated in the dark for the indicated time and the reaction was  
799 stopped by addition of 200 µl 1% ice-cold formalin. Samples were analyzed on a BD Accuri flow  
800 cytometer. Platelets were gated using forward and side scatter.

801

### 802 **Preparation and culture of mouse megakaryocytes**

803 Mature megakaryocytes from mouse bone marrow were defined as the population of cells  
804 generated with the methodology previously described (Dumon, Heath, Tomlinson, Gottgens, &  
805 Frampton, 2006; Mazharian, Ghevaert, Zhang, Massberg, & Watson, 2011).

806

### 807 **Microscopical analysis of platelet and MK adhesion**

808 Glass Coverslips (5 mm diameter) were incubated with 50 µl of perlecan (25 µg/ml), fibrinogen  
809 (25 µg/ml) or both overnight at 4 °C. Surfaces were then blocked with denatured BSA (5 mg/ml)  
810 for 1 h at room temperature. After washing, 50 µl heparinase III (12.5 mU/ml) or buffer were  
811 added to each well and incubated for 1.5 h at 37 °C. Platelets ( $2 \times 10^7$ /ml, 50 µl) were transferred  
812 to the slides and incubated at 37 °C for 45 min in a humid atmosphere. Mature megakaryocytes  
813 ( $6 \times 10^3$ /ml, 100 µl), were incubated for 5 h. Non-adherent cells were removed by gently washing  
814 wells with PBS and adherent cells were fixed with 3.7% paraformaldehyde and permeabilized  
815 with 0.2% Triton-X 100 in water. MKs were stained with tubulin-antibody for 1 h followed by anti-  
816 mouse-Alexa-488 and rhodamin-conjugated phalloidin for 30 minutes and coverslips were  
817 mounted onto microscope slides for imaging using or Antifade Mountant with DAPI (Invitrogen).  
818 Platelets were stained with phalloidin-Alexa-488 for 1 h and coverslips were mounted using  
819 Hydromount (National Diagnostics, Nottingham, UK). Images were captured by a Zeiss Axio  
820 Observer.Z1 / 7 epifluorescence microscope using ZEN Software and 20x (MK) or 63x oil  
821 immersion (platelet) plan apochromat objectives.

822 For platelets, each coverslip was imaged in three random areas. For analysis, the central  
823 quarter of each field of view was cropped (1024 x 1024 pixels) and an ilastik pixel classifier  
824 software was used to outline a binary segmentation (Sommer, Straehle, Kothe, & Hamprecht,  
825 2011). To distinguish touching platelets, KNIME analytic platform was used to manually identify  
826 the centre of individual platelets (Berthold et al., 2009). These coordinates were used to produce  
827 the final segmentation of individual platelets, and platelet size was subsequently calculated.

828 For MK, three tiles of 3x3 images were acquired per coverslip. Average surface area per  
829 cell was calculated by analysing total surface area and number of cells per image using ImageJ.  
830 Both, imaging and analysis, were done blinded.

831

### 832 **Western Blotting and immunoprecipitation**

833 Washed human or mouse platelets ( $5 \times 10^8$ /ml) or in the presence of 10  $\mu$ M integrilin or lotrafiban,  
834 (integrin  $\alpha$ IIb $\beta$ 3 inhibitors) respectively, were incubated with the respective compound under  
835 stirring conditions (1200 rpm, 37°C) for the indicated time. Platelets were lysed by addition an  
836 equal volume of ice cold 2 x lysis buffer an insoluble cell debris was removed by centrifugation  
837 for 10 minutes at 13,000 x g, 4°C.

838 For immunoprecipitations, whole cell lysates (WCLs) were precleared using protein A  
839 Sepharose (Sigma-Aldrich) for 30 minutes at 4°C. G6b-B was immunoprecipitated from collagen-  
840 WCLs with anti-G6b-B antibody and protein A sepharose overnight at 4°C as previously described  
841 (Mazharian et al., 2012).

842 WCLs were either boiled in SDS-loading buffer and analyzed by SDS-PAGE (NuPage 4-  
843 12% Bis-Tris-Gradient Gel) and traditional western blotting or, for quantitative analysis, analyzed  
844 with an automated capillary-based immunoassay platform (Wes, ProteinSimple, San Jose, USA),  
845 according to the manufacturer's instructions. Briefly, WCLs were diluted to the required  
846 concentration with 0.1X sample buffer, then prepared by adding 5X master mix containing 200  
847 mM dithiothreitol (DTT), 5x sample buffer and fluorescent standards (Standard Pack 1, PS-ST01-

848 8) and boiled for 5 minutes at 95°C. Samples, antibody diluent 2, primary antibodies and anti-  
849 rabbit secondary antibody, luminol S-peroxide mix and wash buffer were displaced into Wes 12-  
850 230 kDa prefilled microplates, (pre-filled with separation matrix 2, stacking matrix 2, split running  
851 buffer 2 and matrix removal buffer, SM-W004). The microplate was centrifuged for 5 minutes at  
852 2500 rpm at room temperature. To start the assays, the capillary cartridge was inserted into the  
853 cartridge holder and the microplate placed on the plate holder. To operate Wes and analyze  
854 results Compass Software for Simple Western was used (version 3.1.7, ProteinSimple).  
855 Separation time was set to 31 minutes, stacking loading time to 21 seconds and sample loading  
856 time to 9 seconds. Primary antibodies were incubated for 60 minutes and for detection the High  
857 Dynamic Range (HDR) profile was used. For each antibody, a lysate dilution experiment was  
858 performed first to confirm the optimal dynamic range of the corresponding protein on Wes. This  
859 was followed by an antibody optimization experiment to compare a range of dilutions and select  
860 an antibody concentration near to saturation level to allow a quantitative comparison of signals  
861 between samples. The optimized antibody dilutions and final lysate concentrations were as  
862 follows: anti-Src p-Tyr418 and anti-GAPDH antibodies were used at 1:10 dilution on 0.05 mg/ml  
863 lysates; anti-Shp1 p-Tyr564, anti-Shp2 p-Tyr542 and anti-Shp2 p-Tyr580 antibodies were used  
864 at 1:10 dilution, and anti-Syk p-Tyr525/6 antibody was used at 1:50 dilution on 0.2 mg/ml lysates.

865

## 866 **Statistical analysis**

867 All data is presented as mean +/- standard deviation (SD). Statistical significance was analyzed  
868 by one-way or two-way ANOVA, followed by the appropriate post hoc test, as indicated in the  
869 figure legend, using GraphPad Prism 6 (GraphPad Software Inc., San Diego, CA, USA).

870

## 871 **ACKNOWLEDGEMENTS**

872 The authors would like thank all the voluntary blood donors and the phlebotomists as well as  
873 Jamie Webster from the University of Birmingham Core Protein Expression Facility, Silke Heising

874 and Louise Tee for excellent technical assistance, Jeremy A. Pike for assistance with image and  
875 KNIME analysis, and all members of the Biomedical Services Unit for exceptional maintenance  
876 of mouse colonies.

#### 877 **COMPETING INTERESTS**

878 Riitta Lassila is CSO and shareholder of Aplagon Oy, Helsinki, Finland. Annukka Jouppila  
879 receives research funding from Aplagon Oy, Helsinki, Finland.

880 W. Mark Abbott is CEO and Derek J. Ogg, Tina D. Howard, Helen J. McMiken, Juli Warwicker,  
881 Catherine Geh and Rachel Rowlinson are employees at Peak Proteins Limited and performed  
882 crystallography and protein expression studies as part of a paid service.

883 Jordan Lane and Scott Pollack, at the time of the study, were employees at Sygnature Discovery  
884 Limited and performed surface plasmon resonance measurements as part of a paid service.

885 The authors have no additional competing financial interests.

886

#### 887 **FUNDING**

| Funder                                                       | Grant Reference Number     | Author                                           |
|--------------------------------------------------------------|----------------------------|--------------------------------------------------|
| British Heart Foundation                                     | RG/15/13/31673             | Yotis A. Senis, Jun Mori and Alexandra Mazharian |
| British Heart Foundation                                     | FS/13/1/29894              | Yotis A. Senis                                   |
| Deutsche Forschungsgemeinschaft (German Research Foundation) | VO 2134-1/1                | Timo Vögtle                                      |
| Wellcome Trust                                               | Confidence in Concept 2018 | Yotis A. Senis and Timo Vögtle                   |
| Wellcome Trust                                               | 206194                     | Gavin J. Wright                                  |
| British Heart Foundation                                     | FS/15/58/31784             | Alexandra Mazharian                              |

888

889 The funders had no role in study design, data collection and interpretation, or the decision to  
890 submit the work for publication.

891 **DATA AVAILABILITY**

892 Atomic coordinates have been deposited with the PDB with the accession numbers: 6R0X.

893 The following datasets were generated:

| Author(s)     | Year | Dataset title              | Dataset URL        | Database and Identifier |
|---------------|------|----------------------------|--------------------|-------------------------|
| Vögtle et al. | 2019 | G6b-B in complex with dp12 | Under verification | Protein Databank, 6R0X  |

894

895 **REFERENCES**

- 896 Abbott, D. W., & van Bueren, A. L. (2014). Using structure to inform carbohydrate binding module  
897 function. *Curr Opin Struct Biol*, 28, 32-40. doi:10.1016/j.sbi.2014.07.004
- 898 Battaglia, C., Mayer, U., Aumailley, M., & Timpl, R. (1992). Basement-membrane heparan sulfate  
899 proteoglycan binds to laminin by its heparan sulfate chains and to nidogen by sites in the  
900 protein core. *Eur J Biochem*, 208(2), 359-366.
- 901 Bellavite, P., Andrioli, G., Guzzo, P., Arigliano, P., Chirumbolo, S., Manzato, F., & Santonastaso,  
902 C. (1994). A colorimetric method for the measurement of platelet adhesion in microtiter  
903 plates. *Anal Biochem*, 216(2), 444-450. doi:10.1006/abio.1994.1066
- 904 Berthold, M. R., Cebon, N., Dill, F., Gabriel, T. R., Kötter, T., Meinl, T., Ohl, P., Thiel, K., &  
905 Wiswedel, B. (2009). KNIME-the Konstanz information miner: version 2.0 and beyond.  
906 *AcM SIGKDD explorations Newsletter*, 11(1), 26-31.
- 907 Bix, G., Iozzo, R. A., Woodall, B., Burrows, M., McQuillan, A., Campbell, S., Fields, G. B., & Iozzo,  
908 R. V. (2007). Endorepellin, the C-terminal angiostatic module of perlecan, enhances  
909 collagen-platelet responses via the alpha 2 beta 1-integrin receptor. *Blood*, 109(9), 3745-  
910 3748. doi:10.1182/blood-2006-08-039925
- 911 Boraston, A. B., Bolam, D. N., Gilbert, H. J., & Davies, G. J. (2004). Carbohydrate-binding  
912 modules: fine-tuning polysaccharide recognition. *Biochem J*, 382(Pt 3), 769-781.  
913 doi:10.1042/BJ20040892
- 914 Brändén, C.-I., & Tooze, J. (2009). *Introduction to protein structure*. New York, NY: Garland Pub.
- 915 Bye, A. P., Unsworth, A. J., & Gibbins, J. M. (2016). Platelet signaling: a complex interplay  
916 between inhibitory and activatory networks. *J Thromb Haemost*, 14(5), 918-930.  
917 doi:10.1111/jth.13302
- 918 Cai, Z., Yarovoi, S. V., Zhu, Z., Rauova, L., Hayes, V., Lebedeva, T., Liu, Q., Poncz, M., Arepally,  
919 G., Cines, D. B., & Greene, M. I. (2015). Atomic description of the immune complex  
920 involved in heparin-induced thrombocytopenia. *Nat Commun*, 6, 8277.  
921 doi:10.1038/ncomms9277
- 922 Chandarajoti, K., Liu, J., & Pawlinski, R. (2016). The design and synthesis of new synthetic low-  
923 molecular-weight heparins. *J Thromb Haemost*, 14(6), 1135-1145. doi:10.1111/jth.13312
- 924 Chen, E., Paing, M. M., Salinas, N., Sim, B. K., & Tolia, N. H. (2013). Structural and functional  
925 basis for inhibition of erythrocyte invasion by antibodies that target Plasmodium falciparum  
926 EBA-175. *PLoS Pathog*, 9(5), e1003390. doi:10.1371/journal.ppat.1003390
- 927 Cooney, M. F. (2006). Heparin-induced thrombocytopenia: advances in diagnosis and treatment.  
928 *Crit Care Nurse*, 26(6), 30-36; quiz 37.

- 929 Coxon, C. H., Geer, M. J., & Senis, Y. A. (2017). ITIM receptors: more than just inhibitors of  
930 platelet activation. *Blood*, *129*(26), 3407-3418. doi:10.1182/blood-2016-12-720185
- 931 Dahms, S. O., Mayer, M. C., Roeser, D., Multhaupt, G., & Than, M. E. (2015). Interaction of the  
932 amyloid precursor protein-like protein 1 (APLP1) E2 domain with heparan sulfate involves  
933 two distinct binding modes. *Acta Crystallogr D Biol Crystallogr*, *71*(Pt 3), 494-504.  
934 doi:10.1107/S1399004714027114
- 935 Dawood, B. B., Wilde, J., & Watson, S. P. (2007). Reference curves for aggregation and ATP  
936 secretion to aid diagnose of platelet-based bleeding disorders: effect of inhibition of ADP  
937 and thromboxane A(2) pathways. *Platelets*, *18*(5), 329-345.  
938 doi:10.1080/09537100601024111
- 939 de Vet, E. C., Newland, S. A., Lyons, P. A., Aguado, B., & Campbell, R. D. (2005). The cell surface  
940 receptor G6b, a member of the immunoglobulin superfamily, binds heparin. *FEBS Lett*,  
941 *579*(11), 2355-2358. doi:10.1016/j.febslet.2005.03.032
- 942 Dumon, S., Heath, V. L., Tomlinson, M. G., Gottgens, B., & Frampton, J. (2006). Differentiation  
943 of murine committed megakaryocytic progenitors isolated by a novel strategy reveals the  
944 complexity of GATA and Ets factor involvement in megakaryocytopoiesis and an  
945 unexpected potential role for GATA-6. *Exp Hematol*, *34*(5), 654-663.  
946 doi:10.1016/j.exphem.2006.01.014
- 947 Ehrhardt, C., Schmolke, M., Matzke, A., Knoblauch, A., Will, C., Wixler, V., & Ludwig, S. (2006).  
948 Polyethylenimine, a cost-effective transfection reagent. *Signal Transduction*, *6*(3), 179-  
949 184. doi:10.1002/sita.200500073
- 950 Emsley, P., & Cowtan, K. (2004). Coot: model-building tools for molecular graphics. *Acta*  
951 *Crystallogr D Biol Crystallogr*, *60*(Pt 12 Pt 1), 2126-2132.  
952 doi:10.1107/S09074444904019158
- 953 Evans, P. R., & Murshudov, G. N. (2013). How good are my data and what is the resolution? *Acta*  
954 *Crystallogr D Biol Crystallogr*, *69*(Pt 7), 1204-1214. doi:10.1107/S09074444913000061
- 955 Farach-Carson, M. C., Warren, C. R., Harrington, D. A., & Carson, D. D. (2014). Border patrol:  
956 insights into the unique role of perlecan/heparan sulfate proteoglycan 2 at cell and tissue  
957 borders. *Matrix Biol*, *34*, 64-79. doi:10.1016/j.matbio.2013.08.004
- 958 Fitzgerald, L. A., Leung, B., & Phillips, D. R. (1985). A method for purifying the platelet membrane  
959 glycoprotein IIb-IIIa complex. *Anal Biochem*, *151*(1), 169-177.
- 960 Fukuhara, N., Howitt, J. A., Hussain, S. A., & Hohenester, E. (2008). Structural and functional  
961 analysis of slit and heparin binding to immunoglobulin-like domains 1 and 2 of Drosophila  
962 Robo. *J Biol Chem*, *283*(23), 16226-16234. doi:10.1074/jbc.M800688200
- 963 Gao, C., Boylan, B., Fang, J., Wilcox, D. A., Newman, D. K., & Newman, P. J. (2011). Heparin  
964 promotes platelet responsiveness by potentiating alphaIIb beta3-mediated outside-in  
965 signaling. *Blood*, *117*(18), 4946-4952. doi:10.1182/blood-2010-09-307751
- 966 Gaur, R. K. (2014). Amino acid frequency distribution among eukaryotic proteins. *The IIOAB*  
967 *Journal*, *5*(2), 6.
- 968 Geer, M. J., van Geffen, J. P., Gopalasingam, P., Vogtle, T., Smith, C. W., Heising, S., Kuijpers,  
969 M. J. E., Tullemans, B. M. E., Jarvis, G. E., Eble, J. A., Jeeves, M., Overduin, M.,  
970 Heemskerk, J. W. M., Mazharian, A., & Senis, Y. A. (2018). Uncoupling of the ITIM  
971 receptor G6b-B from the tyrosine phosphatases Shp1 and Shp2 disrupts platelet  
972 homeostasis in mice. *Blood*. doi:10.1182/blood-2017-10-802975
- 973 Han, D. K., Jeong, S. Y., & Kim, Y. H. (1989). Evaluation of blood compatibility of PEO grafted  
974 and heparin immobilized polyurethanes. *J Biomed Mater Res*, *23*(A2 Suppl), 211-228.
- 975 Hofmann, I., Geer, M. J., Vogtle, T., Crispin, A., Campagna, D. R., Barr, A., Calicchio, M. L.,  
976 Heising, S., van Geffen, J. P., Kuijpers, M. J. E., Heemskerk, J. W. M., Eble, J. A., Schmitz-  
977 Abe, K., Obeng, E. A., Douglas, M., Freson, K., Pondarre, C., Favier, R., Jarvis, G. E.,  
978 Markianos, K., Turro, E., Ouwehand, W. H., Mazharian, A., Fleming, M. D., & Senis, Y. A.  
979 (2018). Congenital macrothrombocytopenia with focal myelofibrosis due to mutations in  
980 human G6b-B is rescued in humanized mice. *Blood*. doi:10.1182/blood-2017-08-802769

- 981 Jackson, S. P. (2011). Arterial thrombosis--insidious, unpredictable and deadly. *Nat Med*, 17(11),  
982 1423-1436. doi:10.1038/nm.2515
- 983 Jurrus, E., Engel, D., Star, K., Monson, K., Brandi, J., Felberg, L. E., Brookes, D. H., Wilson, L.,  
984 Chen, J., Liles, K., Chun, M., Li, P., Gohara, D. W., Dolinsky, T., Konecny, R., Koes, D.  
985 R., Nielsen, J. E., Head-Gordon, T., Geng, W., Krasny, R., Wei, G. W., Holst, M. J.,  
986 McCammon, J. A., & Baker, N. A. (2018). Improvements to the APBS biomolecular  
987 solvation software suite. *Protein Sci*, 27(1), 112-128. doi:10.1002/pro.3280
- 988 Kabsch, W. (2010). Xds. *Acta Crystallogr D Biol Crystallogr*, 66(Pt 2), 125-132.  
989 doi:10.1107/S0907444909047337
- 990 Kallberg, M., Wang, H., Wang, S., Peng, J., Wang, Z., Lu, H., & Xu, J. (2012). Template-based  
991 protein structure modeling using the RaptorX web server. *Nat Protoc*, 7(8), 1511-1522.  
992 doi:10.1038/nprot.2012.085
- 993 Karplus, P. A., & Diederichs, K. (2012). Linking crystallographic model and data quality. *Science*,  
994 336(6084), 1030-1033. doi:10.1126/science.1218231
- 995 Kauhanen, P., Kovanen, P. T., & Lassila, R. (2000). Coimmobilized native macromolecular  
996 heparin proteoglycans strongly inhibit platelet-collagen interactions in flowing blood.  
997 *Arterioscler Thromb Vasc Biol*, 20(11), E113-119.
- 998 Kawamoto, T. (2003). Use of a new adhesive film for the preparation of multi-purpose fresh-frozen  
999 sections from hard tissues, whole-animals, insects and plants. *Arch Histol Cytol*, 66(2),  
1000 123-143.
- 1001 Klein, G., Conzelmann, S., Beck, S., Timpl, R., & Muller, C. A. (1995). Perlecan in human bone  
1002 marrow: a growth-factor-presenting, but anti-adhesive, extracellular matrix component for  
1003 hematopoietic cells. *Matrix Biol*, 14(6), 457-465.
- 1004 Krissinel, E., & Henrick, K. (2007). Inference of macromolecular assemblies from crystalline state.  
1005 *J Mol Biol*, 372(3), 774-797. doi:10.1016/j.jmb.2007.05.022
- 1006 Lassila, R., & Jouppila, A. (2014). Mast cell-derived heparin proteoglycans as a model for a local  
1007 antithrombotic. *Semin Thromb Hemost*, 40(8), 837-844. doi:10.1055/s-0034-1395157
- 1008 Lassila, R., Lindstedt, K., & Kovanen, P. T. (1997). Native macromolecular heparin proteoglycans  
1009 exocytosed from stimulated rat serosal mast cells strongly inhibit platelet-collagen  
1010 interactions. *Arterioscler Thromb Vasc Biol*, 17(12), 3578-3587.
- 1011 Li, W., Xu, H., Xiao, T., Cong, L., Love, M. I., Zhang, F., Irizarry, R. A., Liu, J. S., Brown, M., &  
1012 Liu, X. S. (2014). MAGeCK enables robust identification of essential genes from genome-  
1013 scale CRISPR/Cas9 knockout screens. *Genome Biol*, 15(12), 554. doi:10.1186/s13059-  
1014 014-0554-4
- 1015 Lindhout, T., Blezer, R., Schoen, P., Willems, G. M., Fouache, B., Verhoeven, M., Hendriks, M.,  
1016 Cahalan, L., & Cahalan, P. T. (1995). Antithrombin activity of surface-bound heparin  
1017 studied under flow conditions. *J Biomed Mater Res*, 29(10), 1255-1266.  
1018 doi:10.1002/jbm.820291013
- 1019 Lord, M. S., Yu, W., Cheng, B., Simmons, A., Poole-Warren, L., & Whitelock, J. M. (2009). The  
1020 modulation of platelet and endothelial cell adhesion to vascular graft materials by  
1021 perlecan. *Biomaterials*, 30(28), 4898-4906. doi:10.1016/j.biomaterials.2009.05.063
- 1022 Margalit, H., Fischer, N., & Ben-Sasson, S. A. (1993). Comparative analysis of structurally defined  
1023 heparin binding sequences reveals a distinct spatial distribution of basic residues. *J Biol  
1024 Chem*, 268(26), 19228-19231.
- 1025 Marki, A., Esko, J. D., Pries, A. R., & Ley, K. (2015). Role of the endothelial surface layer in  
1026 neutrophil recruitment. *J Leukoc Biol*, 98(4), 503-515. doi:10.1189/jlb.3MR0115-011R
- 1027 Mazharian, A., Ghevaert, C., Zhang, L., Massberg, S., & Watson, S. P. (2011). Dasatinib  
1028 enhances megakaryocyte differentiation but inhibits platelet formation. *Blood*, 117(19),  
1029 5198-5206. doi:10.1182/blood-2010-12-326850
- 1030 Mazharian, A., Mori, J., Wang, Y. J., Heising, S., Neel, B. G., Watson, S. P., & Senis, Y. A. (2013).  
1031 Megakaryocyte-specific deletion of the protein-tyrosine phosphatases Shp1 and Shp2

- 1032 causes abnormal megakaryocyte development, platelet production, and function. *Blood*,  
1033 121(20), 4205-4220. doi:10.1182/blood-2012-08-449272
- 1034 Mazharian, A., Wang, Y. J., Mori, J., Bem, D., Finney, B., Heising, S., Gissen, P., White, J. G.,  
1035 Berndt, M. C., Gardiner, E. E., Nieswandt, B., Douglas, M. R., Campbell, R. D., Watson,  
1036 S. P., & Senis, Y. A. (2012). Mice lacking the ITIM-containing receptor G6b-B exhibit  
1037 macrothrombocytopenia and aberrant platelet function. *Sci Signal*, 5(248), ra78.  
1038 doi:10.1126/scisignal.2002936
- 1039 McCoy, A. J., Grosse-Kunstleve, R. W., Adams, P. D., Winn, M. D., Storoni, L. C., & Read, R. J.  
1040 (2007). Phaser crystallographic software. *J Appl Crystallogr*, 40(Pt 4), 658-674.  
1041 doi:10.1107/S0021889807021206
- 1042 Melhem, M., Abu-Farha, M., Antony, D., Madhoun, A. A., Bacchelli, C., Alkayal, F., AlKhairi, I.,  
1043 John, S., Alomari, M., Beales, P. L., & Alsmadi, O. (2016). Novel G6B gene variant cause  
1044 familial autosomal recessive thrombocytopenia and anemia. *Eur J Haematol*, doi:  
1045 10.1111/ejh.12819. doi:10.1111/ejh.12819
- 1046 Meneghetti, M. C. Z., Hughes, A. J., Rudd, T. R., Nader, H. B., Powell, A. K., Yates, E. A., & Lima,  
1047 M. A. (2015). Heparan sulfate and heparin interactions with proteins. *Journal of The Royal*  
1048 *Society Interface*, 12(110), 20150589. doi:10.1098/rsif.2015.0589
- 1049 Mori, J., Pearce, A. C., Spalton, J. C., Grygielska, B., Eble, J. A., Tomlinson, M. G., Senis, Y. A.,  
1050 & Watson, S. P. (2008). G6b-B inhibits constitutive and agonist-induced signaling by  
1051 glycoprotein VI and CLEC-2. *J Biol Chem*, 283(51), 35419-35427.  
1052 doi:10.1074/jbc.M806895200
- 1053 Murdoch, A. D., Liu, B., Schwarting, R., Tuan, R. S., & Iozzo, R. V. (1994). Widespread expression  
1054 of perlecan proteoglycan in basement membranes and extracellular matrices of human  
1055 tissues as detected by a novel monoclonal antibody against domain III and by in situ  
1056 hybridization. *J Histochem Cytochem*, 42(2), 239-249. doi:10.1177/42.2.7507142
- 1057 Murshudov, G. N., Vagin, A. A., & Dodson, E. J. (1997). Refinement of macromolecular structures  
1058 by the maximum-likelihood method. *Acta Crystallogr D Biol Crystallogr*, 53(Pt 3), 240-255.  
1059 doi:10.1107/S09074444996012255
- 1060 Nagy, Z., & Smolenski, A. (2018). Cyclic nucleotide-dependent inhibitory signaling interweaves  
1061 with activating pathways to determine platelet responses. *Res Pract Thromb Haemost*,  
1062 2(3), 558-571. doi:10.1002/rth2.12122
- 1063 Newland, S. A., Macaulay, I. C., Floto, A. R., de Vet, E. C., Ouwehand, W. H., Watkins, N. A.,  
1064 Lyons, P. A., & Campbell, D. R. (2007). The novel inhibitory receptor G6B is expressed  
1065 on the surface of platelets and attenuates platelet function in vitro. *Blood*, 109(11), 4806-  
1066 4809. doi:10.1182/blood-2006-09-047449
- 1067 Nieswandt, B., & Watson, S. P. (2003). Platelet-collagen interaction: is GPVI the central receptor?  
1068 *Blood*, 102(2), 449-461. doi:10.1182/blood-2002-12-3882
- 1069 Nugent, M. A., Nugent, H. M., Iozzo, R. V., Sanchack, K., & Edelman, E. R. (2000). Perlecan is  
1070 required to inhibit thrombosis after deep vascular injury and contributes to endothelial cell-  
1071 mediated inhibition of intimal hyperplasia. *Proc Natl Acad Sci U S A*, 97(12), 6722-6727.
- 1072 Olsson, P., Lagergren, H., Larsson, R., & Radegran, K. (1977). Prevention of platelet adhesion  
1073 and aggregation by a glutardialdehyde-stabilized heparin surface. *Thromb Haemost*,  
1074 37(2), 274-282.
- 1075 Pearce, A. C., Senis, Y. A., Billadeau, D. D., Turner, M., Watson, S. P., & Vigorito, E. (2004).  
1076 Vav1 and vav3 have critical but redundant roles in mediating platelet activation by  
1077 collagen. *J Biol Chem*, 279(52), 53955-53962. doi:10.1074/jbc.M410355200
- 1078 Pellegrini, L., Burke, D. F., von Delft, F., Mulloy, B., & Blundell, T. L. (2000). Crystal structure of  
1079 fibroblast growth factor receptor ectodomain bound to ligand and heparin. *Nature*,  
1080 407(6807), 1029-1034. doi:10.1038/35039551
- 1081 PyMOL. The PyMOL Molecular Graphics System, Version 2.0 Schrödinger, LLC.
- 1082 Saba, H. I., Saba, S. R., & Morelli, G. A. (1984). Effect of heparin on platelet aggregation. *Am J*  
1083 *Hematol*, 17(3), 295-306.



- 1084 Saku, T., & Furthmayr, H. (1989). Characterization of the major heparan sulfate proteoglycan  
1085 secreted by bovine aortic endothelial cells in culture. Homology to the large molecular  
1086 weight molecule of basement membranes. *J Biol Chem*, 264(6), 3514-3523.
- 1087 Salzman, E. W., Rosenberg, R. D., Smith, M. H., Lindon, J. N., & Favreau, L. (1980). Effect of  
1088 heparin and heparin fractions on platelet aggregation. *J Clin Invest*, 65(1), 64-73.  
1089 doi:10.1172/JCI109661
- 1090 Schlessinger, J., Plotnikov, A. N., Ibrahimi, O. A., Eliseenkova, A. V., Yeh, B. K., Yayon, A.,  
1091 Linhardt, R. J., & Mohammadi, M. (2000). Crystal structure of a ternary FGF-FGFR-  
1092 heparin complex reveals a dual role for heparin in FGFR binding and dimerization. *Mol*  
1093 *Cell*, 6(3), 743-750.
- 1094 Segev, A., Nili, N., & Strauss, B. H. (2004). The role of perlecan in arterial injury and angiogenesis.  
1095 *Cardiovasc Res*, 63(4), 603-610. doi:10.1016/j.cardiores.2004.03.028
- 1096 Semeniak, D., Kulawig, R., Stegner, D., Meyer, I., Schwiebert, S., Bosing, H., Eckes, B.,  
1097 Nieswandt, B., & Schulze, H. (2016). Proplatelet formation is selectively inhibited by  
1098 collagen type I through Syk-independent GPVI signaling. *J Cell Sci*, 129(18), 3473-3484.  
1099 doi:10.1242/jcs.187971
- 1100 Senis, Y. A., Mazharian, A., & Mori, J. (2014). Src family kinases: at the forefront of platelet  
1101 activation. *Blood*, 124(13), 2013-2024. doi:10.1182/blood-2014-01-453134
- 1102 Senis, Y. A., Tomlinson, M. G., Garcia, A., Dumon, S., Heath, V. L., Herbert, J., Cobbold, S. P.,  
1103 Spalton, J. C., Ayman, S., Antrobus, R., Zitzmann, N., Bicknell, R., Frampton, J., Authi, K.  
1104 S., Martin, A., Wakelam, M. J., & Watson, S. P. (2007). A comprehensive proteomics and  
1105 genomics analysis reveals novel transmembrane proteins in human platelets and mouse  
1106 megakaryocytes including G6b-B, a novel immunoreceptor tyrosine-based inhibitory motif  
1107 protein. *Mol Cell Proteomics*, 6(3), 548-564. doi:10.1074/mcp.D600007-MCP200
- 1108 Sharma, S., Bartholdson, S. J., Couch, A. C., Yusa, K., & Wright, G. J. (2018). Genome-scale  
1109 identification of cellular pathways required for cell surface recognition. *Genome Res*.  
1110 doi:10.1101/gr.231183.117
- 1111 Smith, C. W., Raslan, Z., Parfitt, L., Khan, A. O., Patel, P., Senis, Y. A., & Mazharian, A. (2018).  
1112 TREM-like transcript 1: a more sensitive marker of platelet activation than P-selectin in  
1113 humans and mice. *Blood Advances*, 2(16), 2072-2078.  
1114 doi:10.1182/bloodadvances.2018017756
- 1115 Sobel, M., Fish, W. R., Toma, N., Luo, S., Bird, K., Mori, K., Kusumoto, S., Blystone, S. D., &  
1116 Suda, Y. (2001). Heparin modulates integrin function in human platelets. *J Vasc Surg*,  
1117 33(3), 587-594. doi:10.1067/mva.2001.112696
- 1118 Sommer, C., Straehle, C., Kothe, U., & Hamprecht, F. A. (2011). Ilastik: Interactive Learning and  
1119 Segmentation Toolkit. *2011 8th IEEE International Symposium on Biomedical Imaging: From Nano to Macro*, 230-233.
- 1121 Vonrhein, C., Flensburg, C., Keller, P., Sharff, A., Smart, O., Paciorek, W., Womack, T., &  
1122 Bricogne, G. (2011). Data processing and analysis with the autoPROC toolbox. *Acta*  
1123 *Crystallogr D Biol Crystallogr*, 67(Pt 4), 293-302. doi:10.1107/S0907444911007773
- 1124 Whitelock, J. M., Melrose, J., & Iozzo, R. V. (2008). Diverse cell signaling events modulated by  
1125 perlecan. *Biochemistry*, 47(43), 11174-11183. doi:10.1021/bi8013938
- 1126 Williams, C. J., Headd, J. J., Moriarty, N. W., Prisant, M. G., Videau, L. L., Deis, L. N., Verma, V.,  
1127 Keedy, D. A., Hintze, B. J., Chen, V. B., Jain, S., Lewis, S. M., Arendall, W. B., 3rd,  
1128 Snoeyink, J., Adams, P. D., Lovell, S. C., Richardson, J. S., & Richardson, D. C. (2018).  
1129 MolProbity: More and better reference data for improved all-atom structure validation.  
1130 *Protein Sci*, 27(1), 293-315. doi:10.1002/pro.3330
- 1131 Xu, D., & Esko, J. D. (2014). Demystifying heparan sulfate-protein interactions. *Annu Rev*  
1132 *Biochem*, 83, 129-157. doi:10.1146/annurev-biochem-060713-035314
- 1133  
1134

1135 **TABLES**

1136 **Table 1. List of proteins immunoprecipitated with mG6b-B-Fc from vena cava lysates\***

| <b>Accession number</b> | <b>Name</b>                                                           | <b>Score</b> | <b>Unique peptides</b> |
|-------------------------|-----------------------------------------------------------------------|--------------|------------------------|
| E9PZ16                  | Basement membrane-specific heparan sulphate proteoglycan core protein | 607.22       | 22                     |
| F8VQJ3                  | Laminin subunit gamma-1                                               | 434.43       | 75                     |
| P97927                  | Laminin subunit alpha-4                                               | 285.20       | 56                     |
| Q61292                  | Laminin subunit beta-2                                                | 262.37       | 62                     |
| P02469                  | Laminin subunit beta-1                                                | 236.87       | 56                     |
| J3QQ16                  | Protein Col6a3                                                        | 232.99       | 61                     |
| Q3UHL6                  | Putative uncharacterized protein - fibronectin                        | 192.76       | 48                     |
| M0QWP1                  | Agrin                                                                 | 84.47        | 21                     |
| P19096                  | Fatty acid synthase                                                   | 74.68        | 27                     |
| Q61001                  | Laminin subunit alpha-5                                               | 73.24        | 23                     |
| E9QPX1                  | Collagen alpha-1(XVIII) chain                                         | 59.16        | 16                     |
| A2AJY2                  | Collagen alpha-1(XV) chain                                            | 53.53        | 14                     |
| B7ZNH7                  | Collagen alpha-1(XIV) chain                                           | 43.27        | 15                     |
| P26039                  | Talin-1                                                               | 42.29        | 11                     |

1137 \*Proteins that were also prominently present in the negative control (immunoprecipitation with Fc-  
1138 control protein), are not depicted in this list.  
1139

1140

1141 **Table 2. Crystallographic data collection and refinement statistics for the G6b-B ECD-dp12-**  
1142 **Fab complex.**

| <b>X-ray diffraction data</b>              |                                            |
|--------------------------------------------|--------------------------------------------|
| Beamline                                   | I03, Diamond Light Source                  |
| Wavelength (Å)                             | 0.97624                                    |
| Space group                                | C2                                         |
| Cell parameters (Å)                        | 183.8, 72.34, 131.0, $\beta = 124.5^\circ$ |
| Complexes per asymmetric unit              | 1                                          |
| Resolution range (Å)                       | 65.27 – 3.13                               |
| High resolution shell (Å)                  | 3.18 – 3.13                                |
| Rmerge (%) <sup>1)</sup>                   | 17.0 (146.6)                               |
| Total observations,<br>unique reflections  | 74,255 / 24,543                            |
| I/ $\sigma$ (I) <sup>1)</sup>              | 4.0 (0.7)                                  |
| Completeness (%) <sup>1)</sup>             | 97.2 (98.2)                                |
| Multiplicity <sup>1)</sup>                 | 3.0 (3.1)                                  |
| CC <sub>1/2</sub> <sup>1), 2)</sup>        | 0.991 (0.348)                              |
| <b>Refinement</b>                          |                                            |
| Resolution range                           | 63.1 – 3.13                                |
| Unique reflections                         | 24543                                      |
| R <sub>cryst</sub> , R <sub>free</sub> (%) | 22.6, 26.0                                 |
| No of non-H atoms                          | 7,852                                      |
| RMSD bonds (Å)                             | 0.01                                       |
| RMSD angles (°)                            | 1.18                                       |
| B-factors                                  |                                            |
| Wilson (Å <sup>2</sup> )                   | 77.5                                       |
| Average overall (Å <sup>2</sup> )          | 84.7                                       |
| RMSD B-factors (Å <sup>2</sup> )           | 5.737                                      |
| Ramachandran statistics <sup>3)</sup>      |                                            |
| Favoured regions (%)                       | 91.2                                       |
| Allowed regions (%)                        | 8.3                                        |
| Disallowed (%)                             | 0.5                                        |

1143

1144 1) parentheses refer to the high resolution shell

1145 2) as defined in (Karplus & Diederichs, 2012)

1146 3) calculated using molprobity (Williams et al., 2018)

1147

1148 **Table 3. Surface plasmon resonance affinities**

1149 **Immobilized G6b-B receptor (standard configuration)**

| ligand          | G6b-B   | $K_{on}$                    | $K_{off}$                      | $K_D$ (M)                      |
|-----------------|---------|-----------------------------|--------------------------------|--------------------------------|
| Heparin         | Monomer | $1.12 \pm 0.39 \times 10^6$ | $2.01 \pm 0.54 \times 10^{-3}$ | $2.00 \pm 1.17 \times 10^{-9}$ |
|                 | Dimer   | $0.60 \pm 0.56 \times 10^6$ | $3.16 \pm 1.17 \times 10^{-3}$ | $7.76 \pm 5.30 \times 10^{-9}$ |
| Fractionated HS | Monomer | $1.33 \pm 0.01 \times 10^5$ | $9.99 \pm 0.16 \times 10^{-4}$ | $7.47 \pm 0.17 \times 10^{-9}$ |
|                 | Dimer   | $1.20 \pm 0.08 \times 10^5$ | $1.71 \pm 1.11 \times 10^{-3}$ | $14.0 \pm 8.26 \times 10^{-9}$ |
| Perlecan        | Monomer | $1.94 \pm 1.72 \times 10^2$ | $1.01 \pm 0.37 \times 10^{-4}$ | $7.32 \pm 4.64 \times 10^{-7}$ |
|                 | Dimer   | $5.79 \pm 6.94 \times 10^3$ | $2.28 \pm 2.51 \times 10^{-3}$ | $4.74 \pm 1.34 \times 10^{-7}$ |
| dp12            | Monomer | $0.31 \pm 0.27 \times 10^6$ | $2.39 \pm 1.79 \times 10^{-3}$ | $8.12 \pm 1.22 \times 10^{-9}$ |
|                 | Dimer   | $2.50 \pm 2.72 \times 10^6$ | $4.60 \pm 5.01 \times 10^{-3}$ | $1.84 \pm 0.01 \times 10^{-9}$ |

1150

1151 **Immobilized ligand (reversed configuration)**

| ligand          | G6b-B   | $K_{on}$                    | $K_{off}$                      | $K_D$ (M)                      |
|-----------------|---------|-----------------------------|--------------------------------|--------------------------------|
| Heparin         | Monomer | $1.30 \pm 0.29 \times 10^5$ | $8.85 \pm 0.40 \times 10^{-2}$ | $6.99 \pm 1.25 \times 10^{-7}$ |
|                 | Dimer   | $3.28 \pm 0.53 \times 10^5$ | $1.73 \pm 0.04 \times 10^{-3}$ | $5.33 \pm 0.75 \times 10^{-9}$ |
| Fractionated HS | Monomer | $9.22 \pm 2.67 \times 10^3$ | $6.40 \pm 0.33 \times 10^{-3}$ | $7.31 \pm 2.47 \times 10^{-7}$ |
|                 | Dimer   | $3.76 \pm 4.69 \times 10^4$ | $4.58 \pm 6.32 \times 10^{-4}$ | $7.70 \pm 7.21 \times 10^{-9}$ |
| Perlecan        | Monomer | $6.73 \pm 3.38 \times 10^3$ | $1.28 \pm 0.24 \times 10^{-3}$ | $2.28 \pm 1.51 \times 10^{-7}$ |
|                 | Dimer   | $4.90 \pm 2.16 \times 10^4$ | $6.78 \pm 2.57 \times 10^{-4}$ | $1.41 \pm 0.09 \times 10^{-8}$ |

1152 Values are means  $\pm$  SD from two independent experiments.

1153

1154

1155 **FIGURE LEGENDS**

1156

1157 **Figure 1. Prominent binding of mG6b-B-Fc to the vessel wall**

1158 Immunohistochemistry staining of frozen mouse tissue sections with mG6b-B-Fc or human IgG-  
 1159 Fc fragment (control). Bound protein was visualized using a secondary anti-human-Fc-HRP  
 1160 antibody and DAB substrate, prior to counterstaining with hematoxylin. The images were  
 1161 captured by a Zeiss Axio Scan.Z1 slidescanner, and images were exported with the Zeiss Zen  
 1162 software. **(A)** Overview and **(B)** zoom-in images for the indicated tissues are shown. lu, vessel  
 1163 lumen

1164

1165 **Figure 2. G6b-B-Fc binds to heparan sulfate side-chains of perlecan**

1166 **(A)** 96-well plates were coated with the indicated substrates (5  $\mu$ g/ml) and incubated with mouse  
 1167 G6b-B-Fc (10  $\mu$ g/ml), human G6b-B-Fc (30  $\mu$ g/ml) or Fc-control (10  $\mu$ g/ml). Bound protein was  
 1168 detected with an anti-human-Fc-HRP antibody and TMB substrate. n=2-4; SA, streptavidin; **(B)**  
 1169 Perlecan and bovine serum albumin (BSA) were treated or not with heparinase III (5 mU/ml) prior  
 1170 to blocking and mG6b-B-Fc binding was measured. n=4; **(C)** mG6b-B binding to immobilized  
 1171 perlecan was measured in the presence of the indicated concentrations of heparin and heparan  
 1172 sulfate; n=3; P-values were calculated using ordinary one-way ANOVA with Dunnett's post-hoc  
 1173 test and asterisks denote statistical significance compared to respective control. \*\*\*,  $P < 0.001$

1174

1175 **Figure 2-figure supplement 1. Loss of heparin sulfation impairs interaction with G6b-B**

1176 96-well plates were coated with streptavidin followed by incubation of biotinylated heparin and  
 1177 binding huG6b-B monomer/ anti-G6b-B antibody complex (1  $\mu$ g/ml each) was measured in the

1178 presence of **(A)** heparin or oligosaccharide defined length (dp, degree of polymerization = number  
1179 of saccharides) or **(B)** selectively desulfated heparin species at the given concentration. %  
1180 inhibition was calculated by normalizing OD to maximum and minimum values. Representative  
1181 results for 2 independent experiments.  
1182

1183 **Figure 3. The heparan sulfate biosynthesis pathway is required for G6b-B binding to**  
1184 **HEK293 cells**

1185 **(A)** Recombinant G6b-B - produced as a monomeric biotinylated protein and conjugated to  
1186 streptavidin-PE to generate an avid probe - binds to HEL, HEK293 and COLO-320-HSR cells.  
1187 **(B)** A genome-wide loss-of-function approach identifies the HS biosynthesis pathway as the  
1188 required factor for mediating binding of recombinant G6b-B to HEK293 cell (left panel). X- and y-  
1189 axis represent log-fold-change (LFC) and Robust Rank Aggregation (RRA) score calculated using  
1190 the MAGeCK software, respectively. Circles represent individual genes and sizes represent the  
1191 false-discovery rate: large circle = FDR<1%, small circle = 1% < FDR < 5%. Genes with FDR <  
1192 5% are color coded according to their functional annotation and genes corresponding to the HS  
1193 biosynthesis pathway are additionally named. The HS biosynthesis pathway is depicted in the  
1194 right panel with the genes identified in the loss-of-function approach highlighted. Similar results  
1195 were obtained in HEL cells (not shown). **(C)** G6b-B binding to HEK293 cells was measured by  
1196 flow cytometry in the presence or absence of the indicated concentration of heparin or chondroitin  
1197 sulfate. One representative out of three experiments is shown. **(D)** G6b-B loses its binding to  
1198 cell lines where SLC35B2, required for the sulfation of GAGs, is targeted. To ensure that the KO  
1199 cells lack GAGs, a known HS binding protein is used as a control, which loses binding on these  
1200 cell lines.  
1201

1202 **Figure 4. Ribbon representation of the ternary complex of the extracellular domain (ECD)**  
1203 **of human G6b-B bound to heparin and the Fab fragment of a G6b-B-specific antibody.**

1204 **(A)** Overview of the structure with G6b-B colored in magenta and dark green, heparin shown as  
1205 spheres, and the Fab fragment chains in light green / light blue, respectively. The assembly  
1206 represents the asymmetric unit of the crystal lattice (space group C2). **(B)** Close-up view  
1207 illustrating the position of the heparin ligand relative to the secondary structure of the G6b-B dimer.  
1208 Heparin residues (shown as sticks) are sulfated D-glucosamine (SGN) and L-iduronic acid (IDS).  
1209 The color coding of heparin atoms is C – yellow, O – red, N – blue, S – green and  $\beta$ -strands in  
1210 G6b-B are labelled according to the canonical Ig-fold.  
1211 **(C)** Superposition of chains F (rainbow colored) and E (grey) of the G6b-B ECD. Strands are  
1212 labelled according to the canonical  $\beta$ -sandwich topology of the variable Ig domain. The fold of  
1213 G6b-B deviates from the canonical Ig fold in missing strand C", and in strand A being part of the  
1214  $\beta$ -sheet of strands B, E and D. Chain F is color ramped from blue (N-terminus) to red (C-terminus),  
1215 and the position of the disulfide bond (Cys35–Cys108) is indicated by sticks in magenta. The  
1216 glycosylation site Thr73 is shown (sticks) with glycosyl groups omitted from the view. **(D)** Multiple  
1217 sequence alignment of G6b-B orthologues across mammalian species with secondary structure  
1218 elements indicated above the sequence. Residue numbers refer to the sequence of human G6b.  
1219 Conserved residues are boxed, with identities shown as white letters on red background. Species  
1220 abbreviations are Hs – Homo sapiens, Pg – Pan troglodytes (chimpanzee), Mm – Mus musculus  
1221 (mouse), Rn – Rattus norvegicus (rat), Oc – Oryctolagus cuniculus (rabbit), Cl – Canis lupus  
1222 familiaris (dog), Sc – Sus scrofa (wild boar), Bt – Bos taurus (cattle). G6b\_mut is the sequence  
1223 of the recombinant human G6b-B ECD used in crystallization, with mutations of the 5 putative  
1224 glycosylation sites (marked with M). GY indicates the retained O-glycosylation site and DS  
1225 indicates the disulfide cysteine residues  
1226

1227 **Figure 4-figure supplement 1. Mutations in G6b-B abolishes heparin binding**

1228 **(A)** G6b-B model (i) ribbons representation showing predicted locations of basic residues K54,  
1229 K58, R60 & R61 in green (ii) superposition of G6b-B model (dark blue) with Siglec-7 (cyan) in  
1230 complex with its sialic acid ligand (yellow) (iii) & (iv) electrostatic surface potentials as calculated  
1231 by ABPS for both the wild-type G6b-B model and the G6b-B K54D, K58D, R60E, R61E mutant  
1232 respectively. Positively charged surfaces are blue and negatively charged are red. **(B, C)** CHO  
1233 cells were transiently transfected with wild-type (WT) or mutant G6b-B and analyzed by flow  
1234 cytometry. **(B)** Staining of cells with an anti-G6b-B antibody confirms similar transfection efficacy  
1235 and G6b-B expression. **(C)** CHO cells were incubated with biotinylated heparin, followed by PE-  
1236 labelled streptavidin. Heparin-biotin binding of all cells (left) and G6b-B<sup>+</sup> cells (right), was  
1237 measured. Representative results from two independent experiments.  
1238

#### 1239 **Figure 4-figure supplement 2. Representation of the crystal lattice**

1240 **(A)** Crystal lattice of the ternary complex of G6b-B bound to heparin and the G6b-B specific Fab  
1241 fragment. Top and bottom half the view are related by a 90° rotation about the horizontal axis.  
1242 Proteins are shown as C $\alpha$  traces, with G6b-B in magenta and dark green, and the Fab fragment  
1243 chains in light blue and light grey, respectively.  
1244 **(B)** Illustration of crystal lattice contacts by the G6b-B ECD dimer. The view shown is the same  
1245 as in (A), but omitting the Fab fragment chains. Top and bottom half the view are related by a  
1246 90° rotation about the horizontal axis.  
1247

#### 1248 **Figure 4-figure supplement 3. Unbiased $\sigma_A$ -weighted difference density map**

1249 demonstrating the presence of the O-linked glycosyl groups at Thr73.  
1250

#### 1251 **Figure 5. Heparin induces G6b-B dimer formation**

1252 Size exclusion chromatography of G6b-B ECD. Protein was either analyzed immediately or  
1253 incubated at 4°C for 1.5 hours in the presence of dp12 before analysis on a Superdex 75 10/300  
1254 GL column. Molecular weights were estimated using a calibration curve. Values of 30.8kDa and  
1255 12.9 kDa were obtained for G6b-B ECD in the presence and absence of dp12 (approx. 3.6 kDa),  
1256 respectively. Ribonuclease A (13.7 kDa) and carbonic anhydrase (29 kDa) are shown for  
1257 comparison.  
1258

#### 1259 **Figure 6. Electrostatic surface potential of the G6b-B ECD and representation of non- 1260 covalent contacts between heparin and G6b.**

1261 **(A)** The G6b-B dimer is shown with a translucent surface colored according to electrostatic  
1262 surface potential (calculated using CCP4mg). The heparin ligand is shown as a stick model and  
1263 polar contacts are indicated by dashed lines in magenta. Selected residues are labelled with  
1264 superscripts indicating the relevant G6b-B protein chain.  
1265 **(B, C)** Representation of non-covalent contacts between heparin and the G6b dimer. **(B)**  
1266 Residues of G6b-B forming non-covalent contacts with heparin. Polar contacts are indicated by  
1267 dashed lines in magenta, van der Waals interactions are visualized by showing relevant residues  
1268 with their (transparent) molecular surface. Superscript capitals designate the G6b-B protein  
1269 chain. **(C)** LigPlot representation of the heparin-G6b-B contacts, with van der Waals / hydrophobic  
1270 interactions indicated by the bent comb symbol, and polar contacts shown as dashed lines with  
1271 distance show indicated in units of Å.  
1272

#### 1273 **Figure 6-figure supplement 1. Unbiased $\sigma_A$ -weighted difference density map 1274 demonstrating the presence of the heparin ligand.**

1275 The electron map has been calculated with phases of from a structure model lacking the  
1276 heparin atoms and with amplitudes ( $F_o - F_c$ ), contouring the map at 2.8  $\sigma$  above the mean.

1277

1278 **Figure 7. High affinity interaction between G6b-B and its ligands**

1279 Representative traces of the surface plasmon resonance experiments, results of which are  
1280 presented in Table 2. **(A)** Binding of the indicated compound to immobilized dimeric G6b-B in the  
1281 standard configuration. **(B)** Results from the reversed configuration, depicting traces of dimeric  
1282 and monomeric G6b-B binding to immobilized heparin.  
1283

1284 **Figure 8. Heparan sulfate removal of perlecan facilitates platelet adhesion**

1285 Indicated substrates were coated alone or in combination into 96-well plates (2.5 µg/ml collagen  
1286 and 10 µg/ml for all other substrates) overnight. Where indicated, wells were treated with 5 mU/ml  
1287 heparinase III. Platelets from **(A)** human or **(B)** mouse were allowed to adhere for 1 h and  
1288 adhesion was quantified colorimetrically with pNPP. **(A)** Human, platelets; n=4-5 individual  
1289 donors from 3-4 independent experiments; P-values were calculated using one-way ANOVA with  
1290 Sidak's post-hoc test; **(B)** Mouse platelets; n=4 samples/condition/genotype from two independent  
1291 experiments. Due to severe thrombocytopenia, platelets from up to 5 mice were pooled for one  
1292 KO sample. P-values for differences between WT and *G6b*<sup>-/-</sup> mice were calculated using two-way  
1293 ANOVA with Sidak's post-hoc test. **(C)** Adhesion of WT and *G6b*<sup>-/-</sup> platelets on perlecan. (i) Mean  
1294 surface area of individual platelets quantified by KNIME software analysis, n=5-7  
1295 mice/condition/genotype from 2-3 independent experiments using one-way ANOVA with Sidak's  
1296 post-hoc test \*\*, P<0.01 and \*\*\*, P<0.001. (ii) Representative images of platelets stained for actin  
1297 with phalloidin-Alexa-488; scale bar: 5 µm; hep III, heparinase III  
1298

1299 **Figure 9. G6b knockout megakaryocytes show enhanced spreading on perlecan**

1300 **(A, B)** Immunohistochemical analysis of murine femur sections. Sinusoids were marked using  
1301 anti-endoglin (CD105) and MKs by anti-GPIX. **(A)** Perlecan is abundantly expressed within the  
1302 bone marrow cavity and present in intersinusoidal spaces and part of basement membranes in  
1303 sinusoids and arterioles. MKs (stained with GPIX) come into contact with perlecan. **(B)** Perlecan  
1304 is not detected inside MKs; scale bar: 20 µm. **(C)** Adhesion of WT and *G6b*<sup>-/-</sup> MKs on perlecan.  
1305 (i) Mean surface area of MKs was quantified with ImageJ. n=4-6 mice/condition/genotype from 3  
1306 independent experiments; P values were calculated using two-way ANOVA with Sidak's post-hoc  
1307 \*\*\*, P<0.001; \*, P<0.05 (ii) Representative images of platelets stained for tubulin (green) and DAPI  
1308 (blue); scale bar: 20 µm  
1309

1310 **Figure 10. Effects of G6b-B ligands on platelet aggregation**

1311 Human platelet rich plasma (PRP) was incubated with the indicated compound for 90 s prior to  
1312 agonist addition. Aggregation traces were recorded on a Chronolog four channel aggregometer.  
1313 Averaged aggregation traces (left) and area under the curve (AUC) quantification (right) of platelet  
1314 aggregation (n=3-5 per condition), P-values were calculated using one-way ANOVA with  
1315 Dunnett's post-hoc test and refer to the untreated control; \*\*\*, P<0.001, \*\*, P<0.01 and \*, P<0.05  
1316

1317 **Figure 11. APAC inhibits CLEC-2-mediated degranulation in WT but not G6b KO platelets**

1318 Mouse blood was incubated with the indicated compounds (0.05 µM) in the **(A)** absence or **(B)**  
1319 presence or of a stimulating CLEC-2 (3 µg/ml) for the indicated time. Samples were fixed and  
1320 TLT-1 surface levels, a marker for platelet degranulation were determined by flow cytometry.  
1321 n=5-6 mice/condition/genotype from 2 independent experiments. P-values were calculated using  
1322 **(A)** two-way ANOVA with Sidak's post-hoc test (comparison of WT APAC vs *G6b*<sup>-/-</sup> APAC) or **(B)**

1323 two-way ANOVA with Turkey's post-hoc test and refer to the difference between WT and *G6b*<sup>-/-</sup>  
1324 <sup>\*\*\*</sup>, *P*<0.001 and <sup>\*</sup>, *P*<0.05

1325

1326 **Figure 11-figure supplement 1. Effect of heparin and APAC on fibrinogen binding of WT**  
1327 **and G6b KO platelets**

1328 Mouse blood was incubated with the indicated compounds (0.05 μM) in the **(A)** absence or **(B)**  
1329 presence or of a stimulating CLEC-2 (3 μg/ml) for the indicated time. Samples were fixed and  
1330 fibrinogen-Alexa488 binding, a measure of integrin activation, was determined by flow cytometry.  
1331 n=5-6 mice/condition/genotype from 2 independent experiments. P-values were calculated using  
1332 **(A)** two-way ANOVA with Sidak's post-hoc test (comparison of WT APAC vs *G6b*<sup>-/-</sup> APAC) or **(B)**  
1333 two-way ANOVA with Turkey's post-hoc test and refer to the difference between WT and *G6b*<sup>-/-</sup>  
1334 <sup>\*\*\*</sup>, *P*<0.001, <sup>\*\*</sup>, *P*<0.01 and <sup>\*</sup>, *P*<0.05

1335

1336 **Figure 11-figure supplement 2. G6b-B signaling is required for the inhibitory effect of**  
1337 **APAC on platelet degranulation.**

1338 Mouse blood was incubated with the indicated compounds for 20 min. Samples were fixed and  
1339 TLT-1 surface levels were determined by flow cytometry. n=6-8 mice/condition/genotype from 3  
1340 independent experiments. P-values were calculated using two-way ANOVA with Turkey's post-  
1341 hoc test <sup>\*\*\*</sup>, *P*<0.001; and <sup>\*\*</sup> *P*<0.01.

1342

1343 **Figure 12. APAC induces G6b-B phosphorylation and downstream signaling.**

1344 **(A)** Washed human platelets (5 x 10<sup>8</sup>/ml) were incubated for 90 s with 0.05 μM APAC, 0.7 μM  
1345 heparin or buffer in the presence of 10 μM integrilin. Where indicated, platelets were additionally  
1346 stimulated with 3 μg/ml collagen for 90 s following compound treatment. Samples were lysed and  
1347 whole cell lysates (WCL) were analyzed by western blotting. Representative western blots from  
1348 n=3-5 independent experiments. **(B)** Lysates were also analyzed by quantitative capillary-based  
1349 gel electrophoresis with the indicated antibodies. Representative data is displayed as blots on  
1350 the left and quantification of peak areas on the right. **(C, D)** Washed mouse platelets (5 x 10<sup>8</sup>/ml)  
1351 were incubated for 90 s with 0.05 μM APAC or buffer in the presence of 10 μM Itrafiban. Samples  
1352 were analyzed as described above. The *G6b*<sup>-/-</sup> samples show IgG light chain fragments, due to  
1353 IgG binding to the platelet surface. P-values were calculated using one-way ANOVA with Sidak's  
1354 post-hoc test. <sup>\*\*\*</sup>, *P*<0.001, <sup>\*\*</sup>, *P*<0.01 and <sup>\*</sup>, *P*<0.05; p-Tyr, anti-phosphotyrosine (4G10).

1355

1356 **Figure 12-figure supplement 1. Effects of G6b-B ligands on G6b-B phosphorylation.**

1357 Washed human platelets (5x10<sup>8</sup>/ml) were incubated for 90 s with the indicated compounds in the  
1358 presence of 10 μM integrilin. Whole cell lysates (WCL) were directly analyzed by western blotting  
1359 **(A, C)** with the indicated antibodies or **(B)** subjected to immunoprecipitation (IP) with an anti-  
1360 human G6b-B antibody, followed by western blotting. Representative results of 3 independent  
1361 experiments.

1362

1363 **Figure 12-figure supplement 2. Effects of high doses of G6b-B ligands on G6b-B**  
1364 **phosphorylation**

1365 **(A, B)** Washed human platelets (5 x 10<sup>8</sup>/ml) were incubated for 90 s with the given compounds at  
1366 the given concentration in the presence of 10 μM integrilin. Samples were lysed and whole cell  
1367 lysates (WCL) were directly analyzed by western blotting **(A)** with the indicated antibodies or **(B)**  
1368 subjected to immunoprecipitation (IP) with an anti-human G6b-B antibody, followed by western  
1369 blotting.

1370

1371 **Figure 13. Model of glycan-mediated regulation of G6b-B function**



1372 **(A)** In the absence of any ligand, G6b-B is mainly present in a monomeric state and  
1373 phosphorylated to a low degree. **(B)** Small soluble ligands, e.g. heparin, induce dimerization of  
1374 the receptor, however, induce only mild G6b-B phosphorylation and downstream signaling. **(C)**  
1375 Multivalent ligands, e.g. the HS chains of vessel wall perlecan (not shown) or the heparin  
1376 molecules in APAC, cluster G6b-B dimers into higher order oligomers, hence facilitating  
1377 downstream signaling of G6b-B, including robust phosphorylation of G6b-B and downstream  
1378 Shp1 and Shp2 phosphatases, resulting in inhibition of platelet activation. SFK, src family kinase  
1379

1380 **Supplementary files**

1381

1382 **Supplementary figure 1. Selected structures of proteins with a heparin ligand**

1383

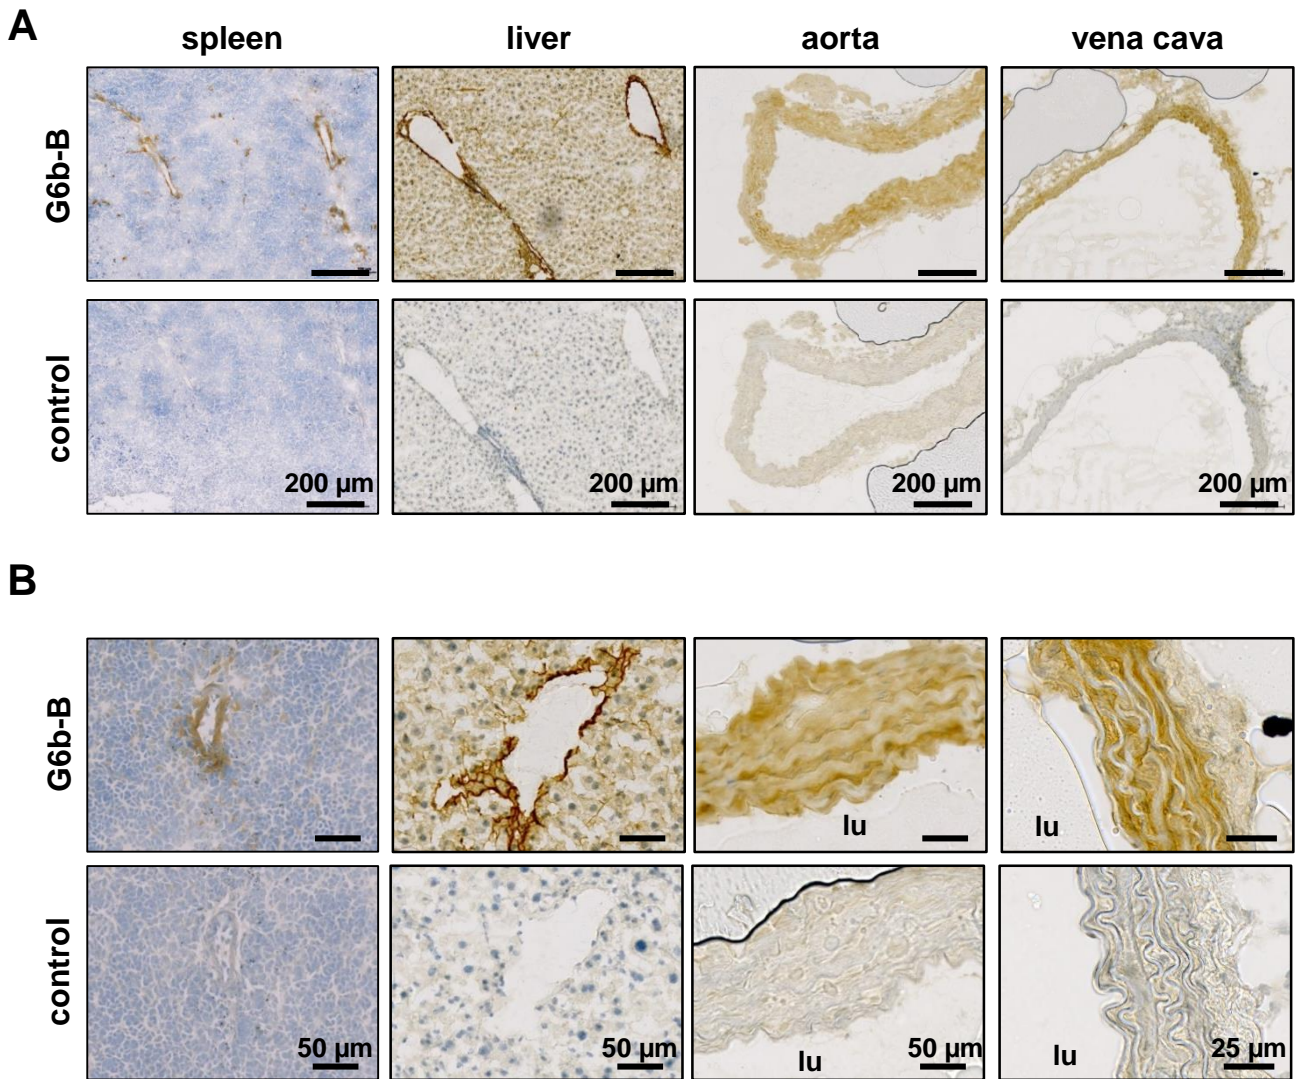

**Figure 2**

**A**

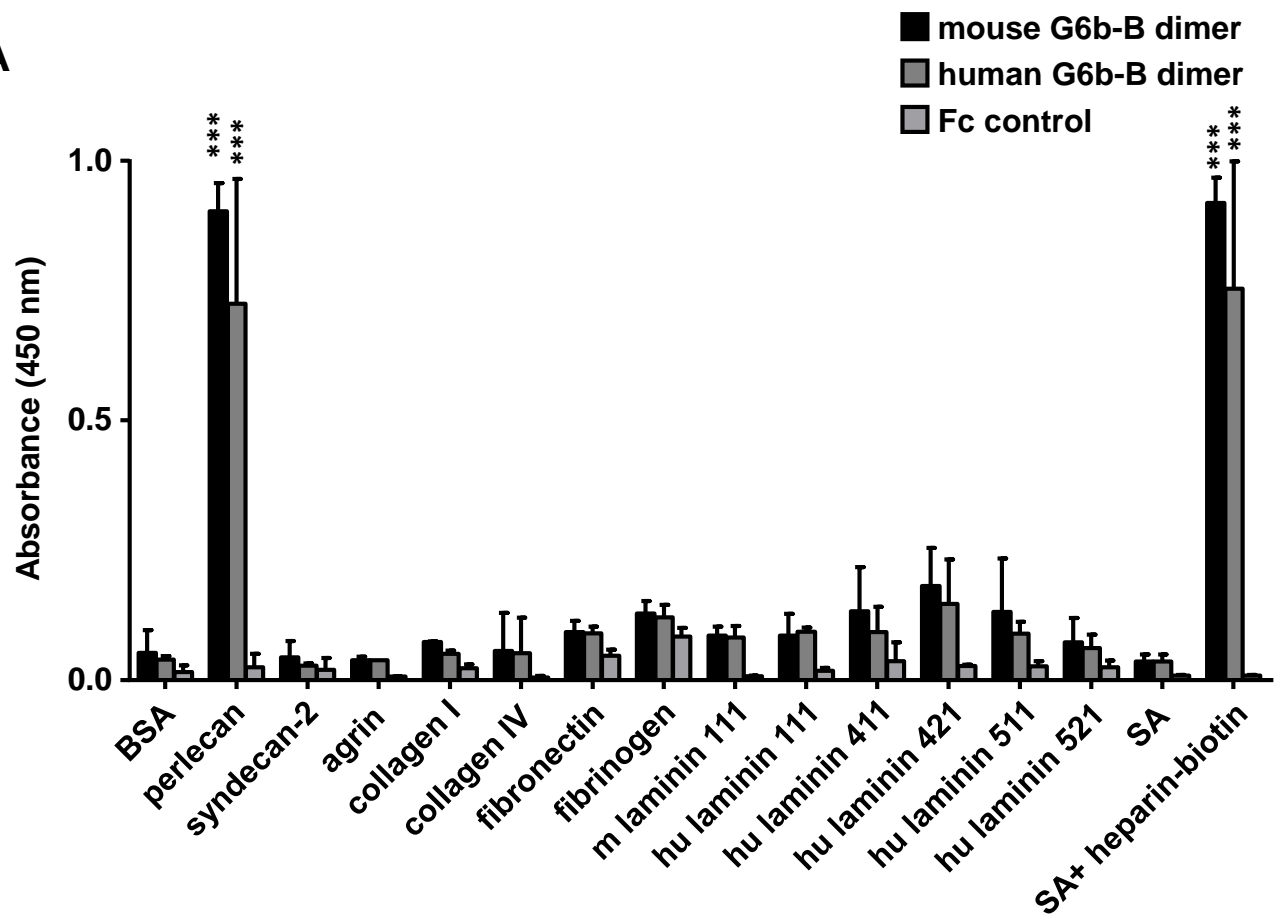

**B**

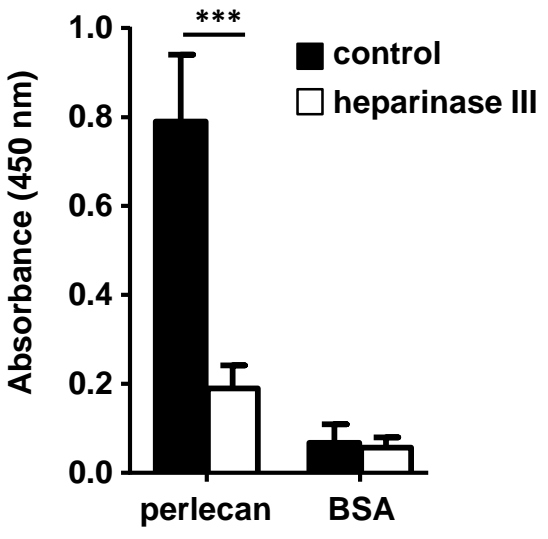

**C**

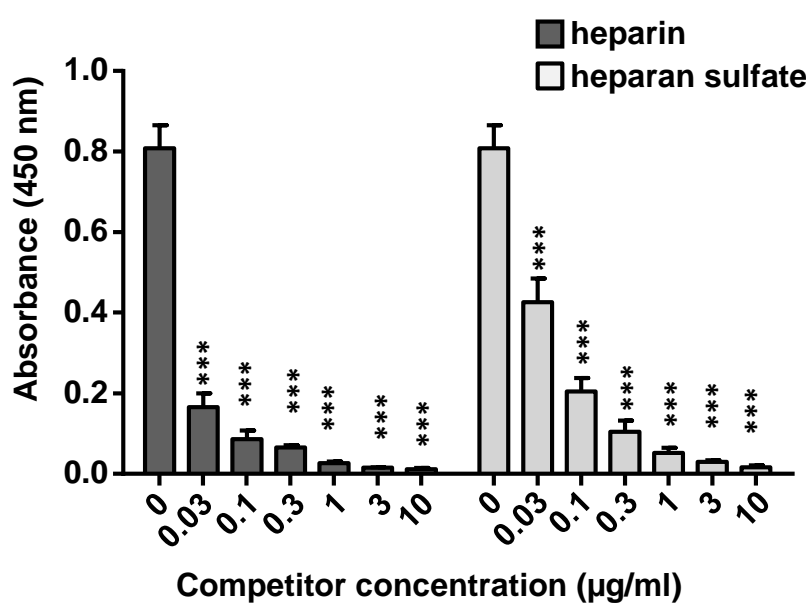

Figure 2–figure supplement 1

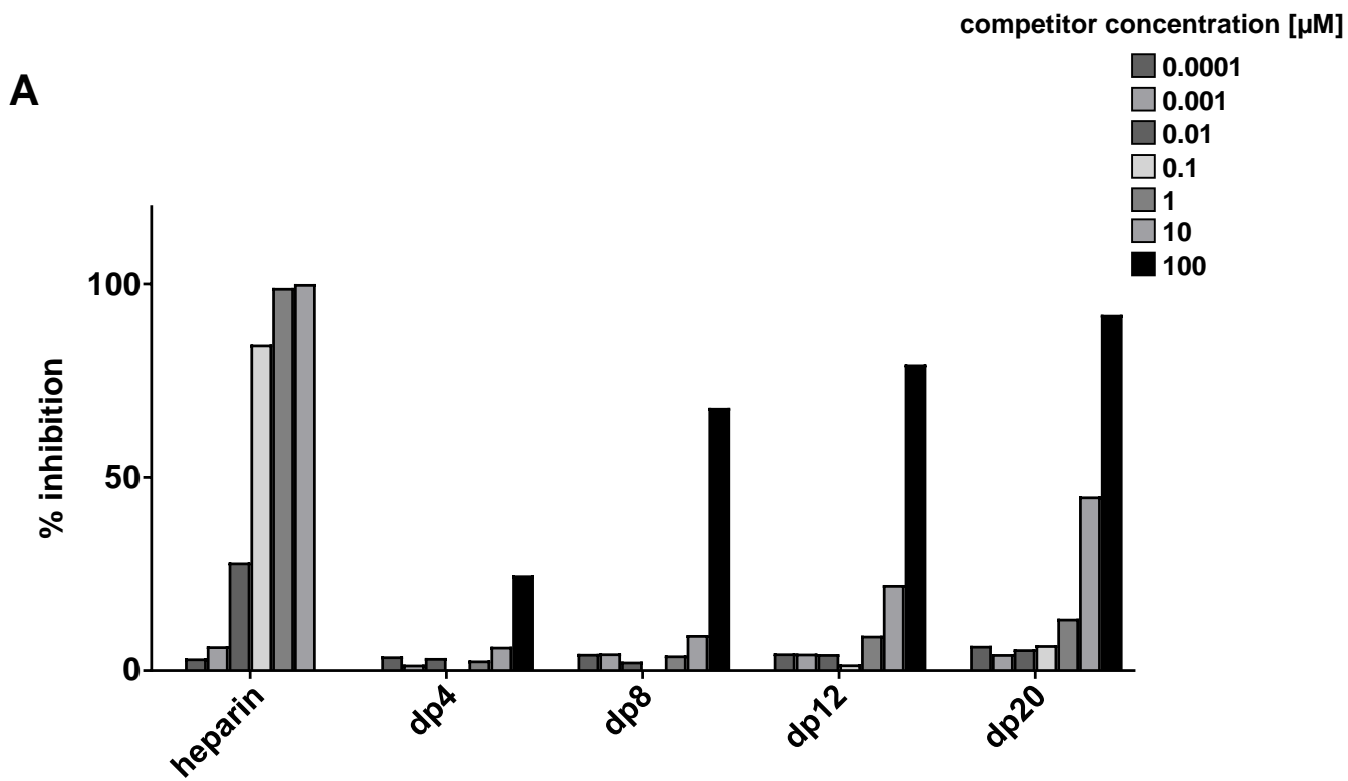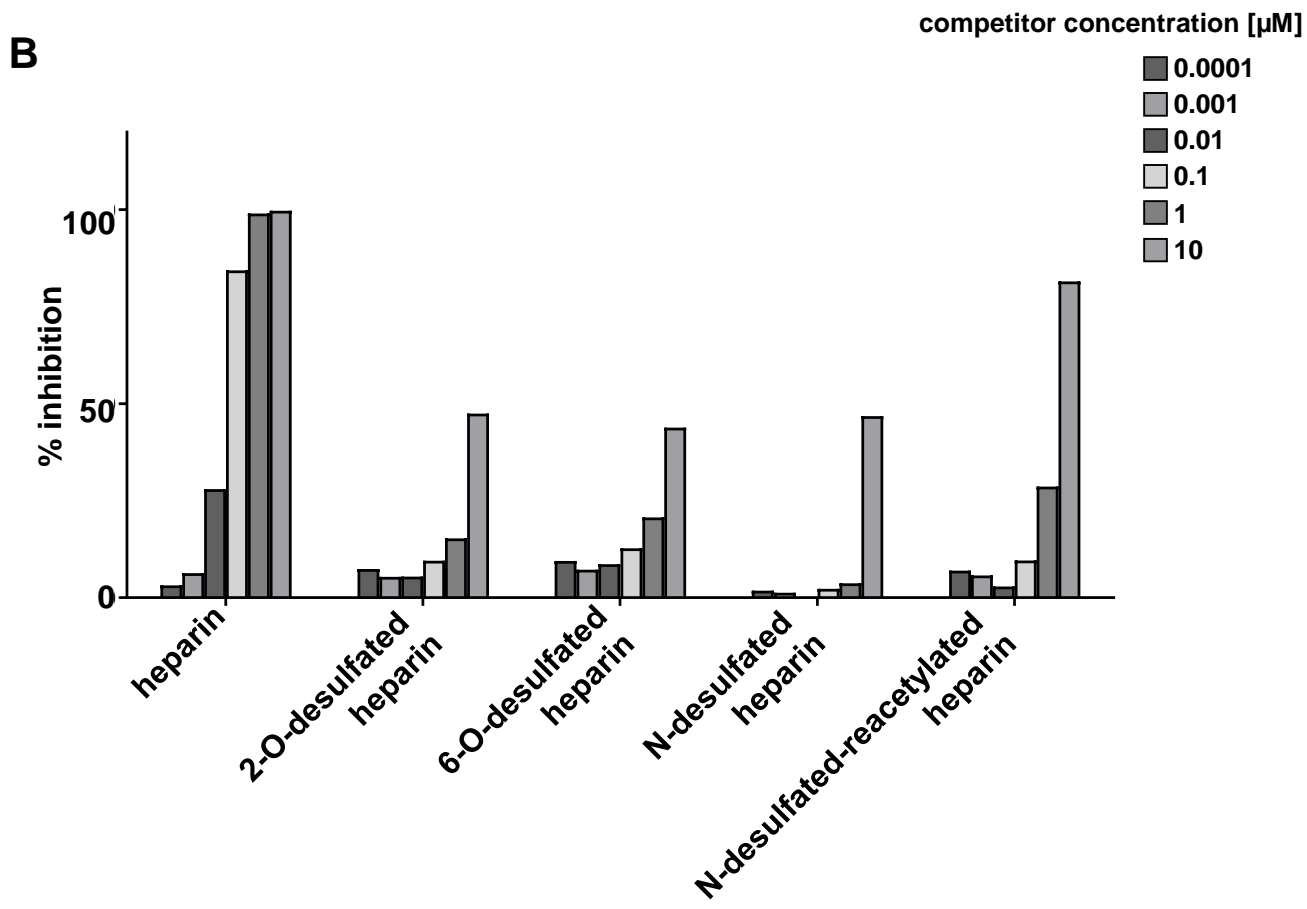

**A**

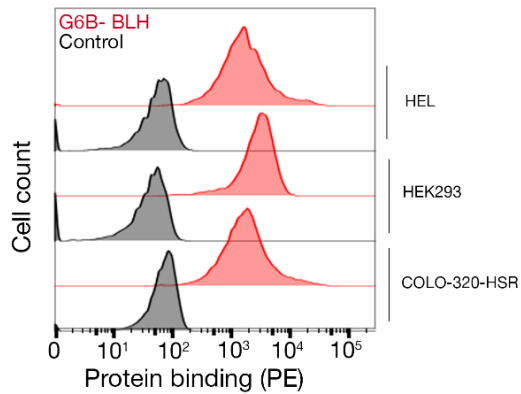

**B**

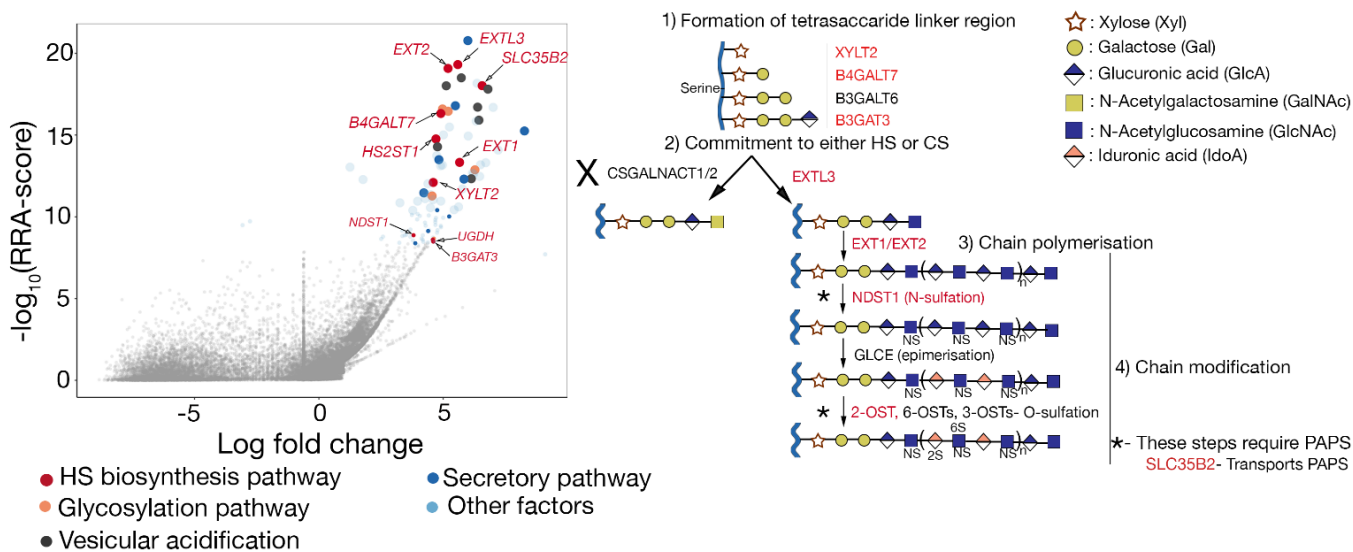

**C**

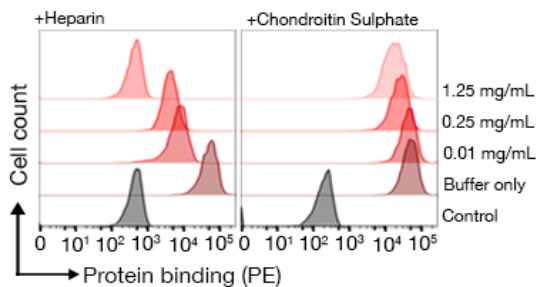

**D**

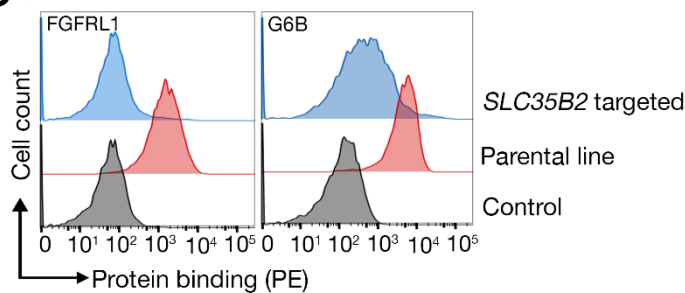

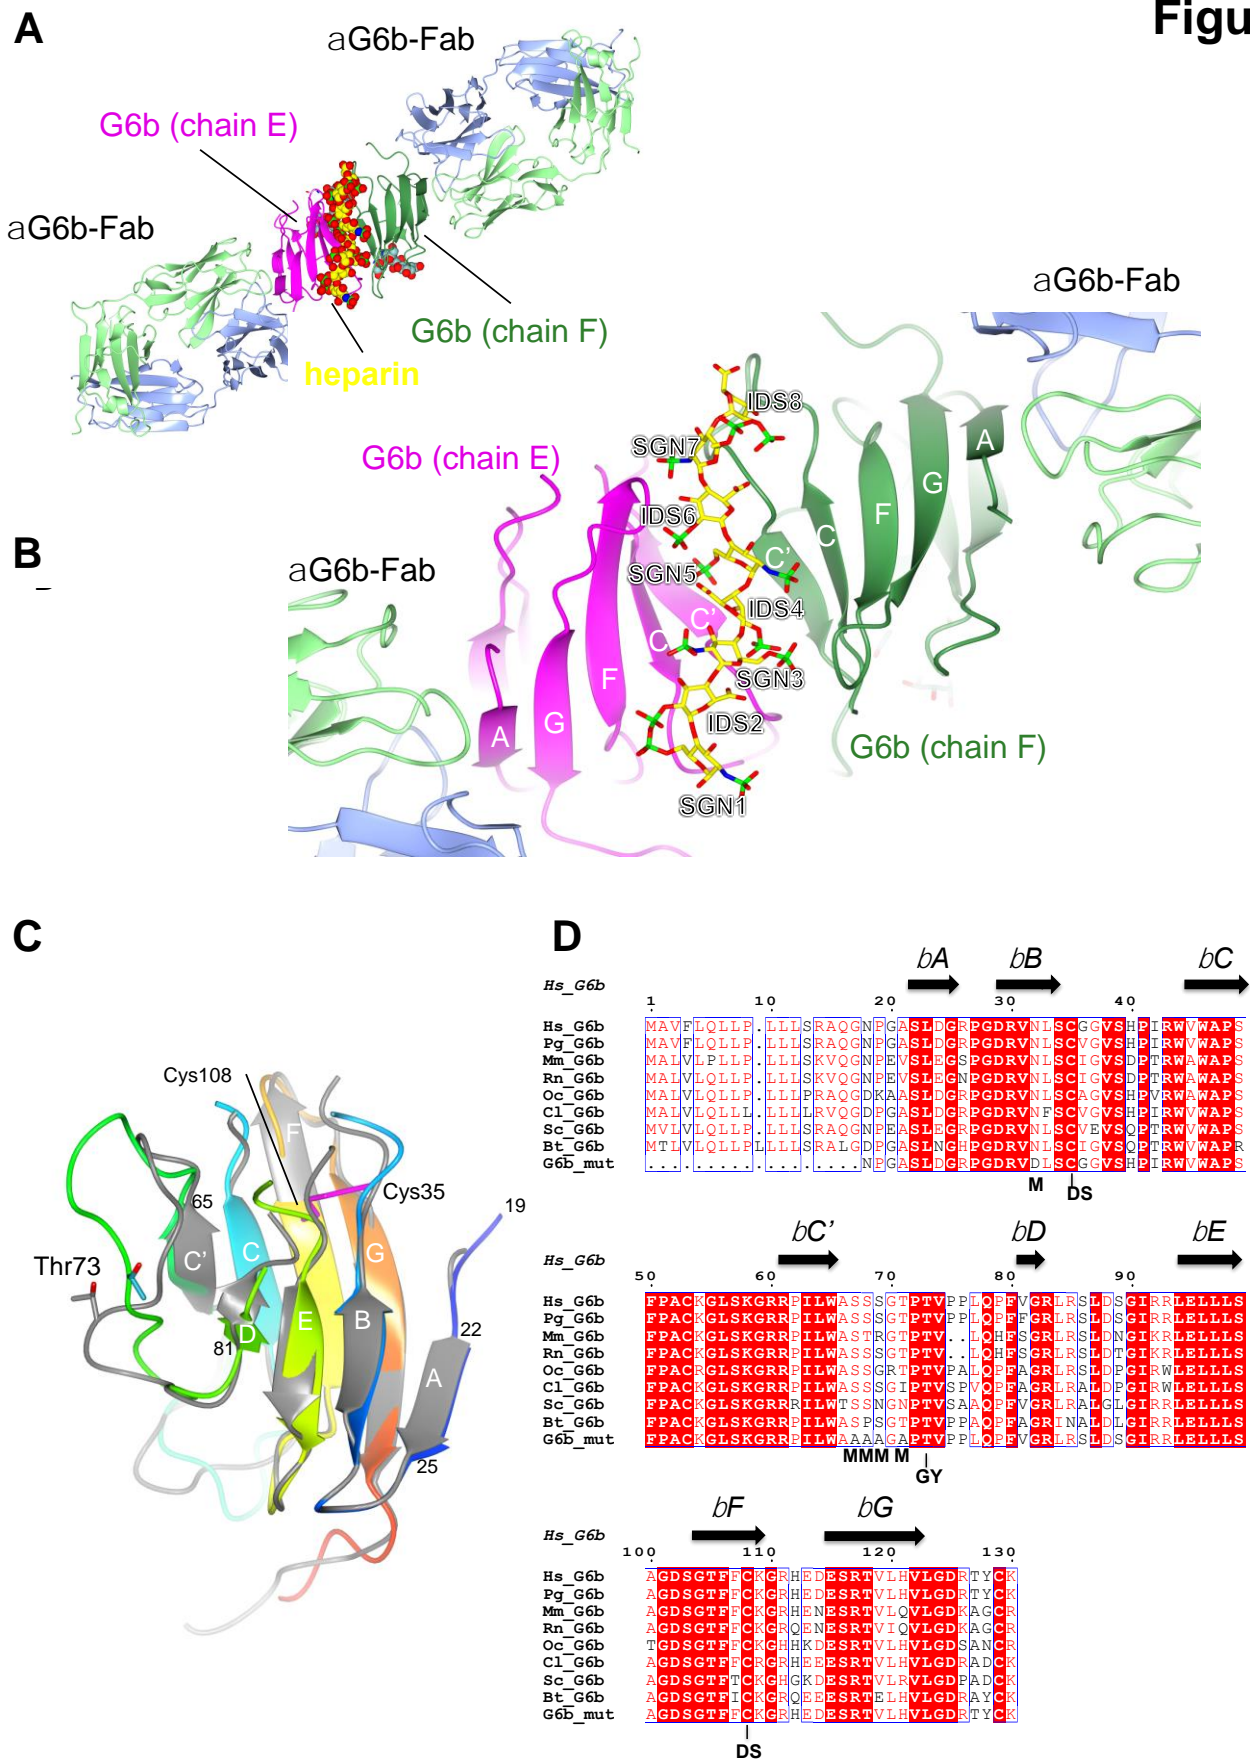

# Figure 4-figure supplement 1

## A

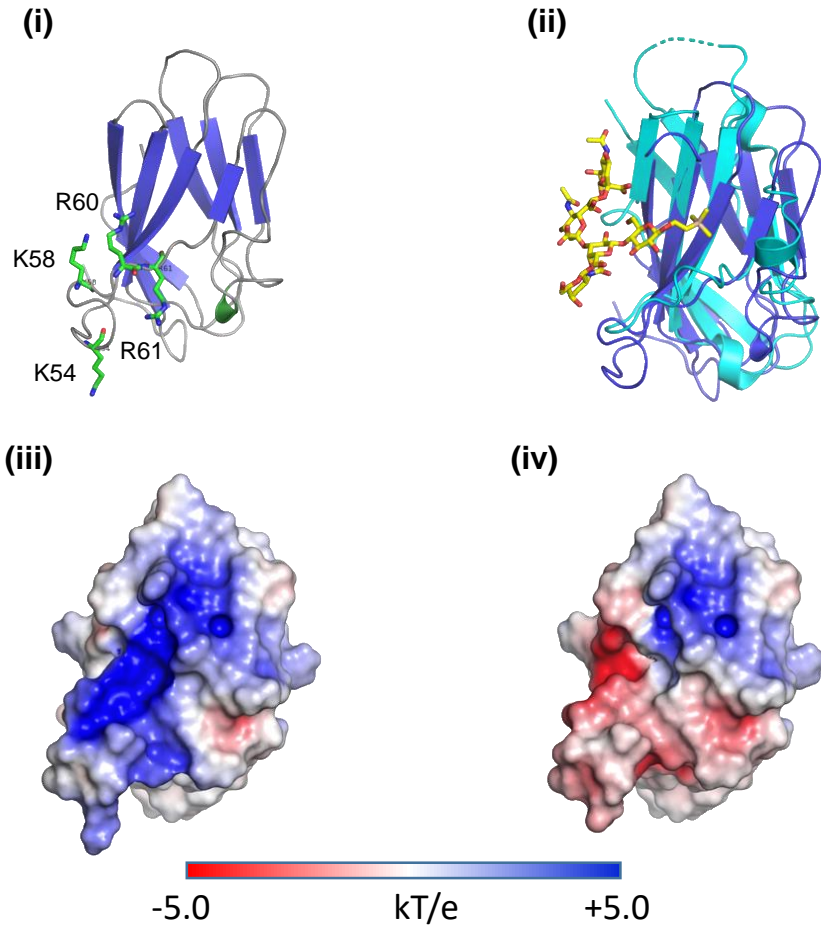

## B

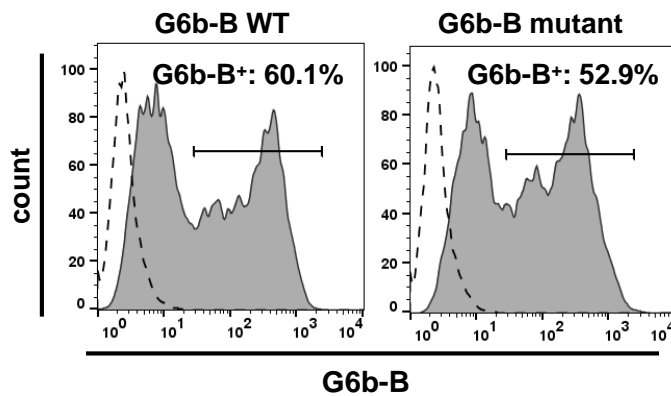

## C

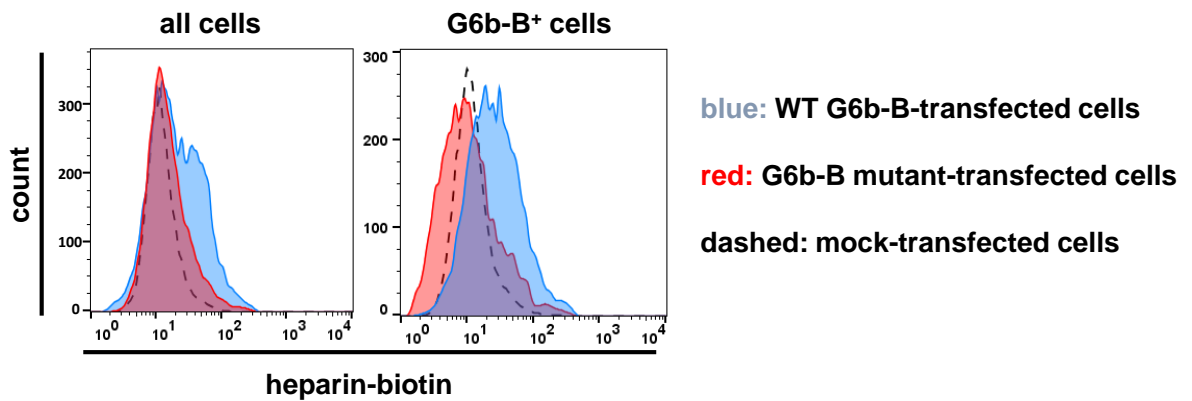

**A**

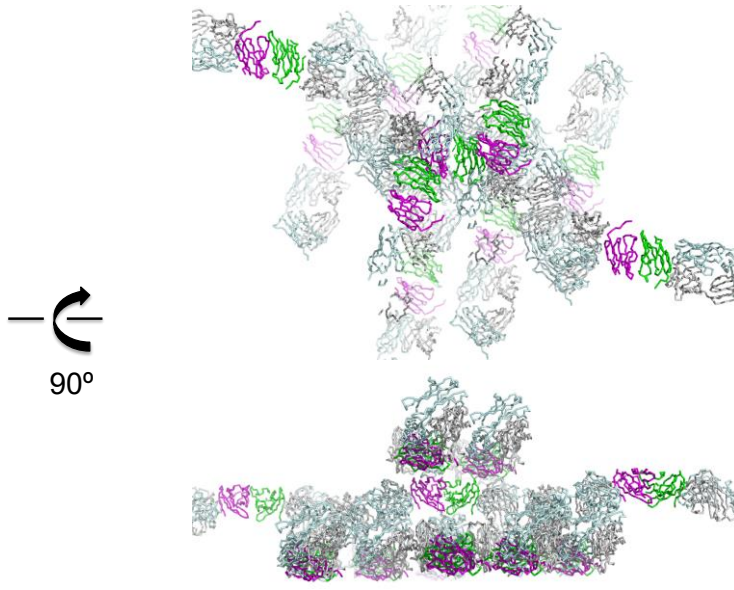

**B**

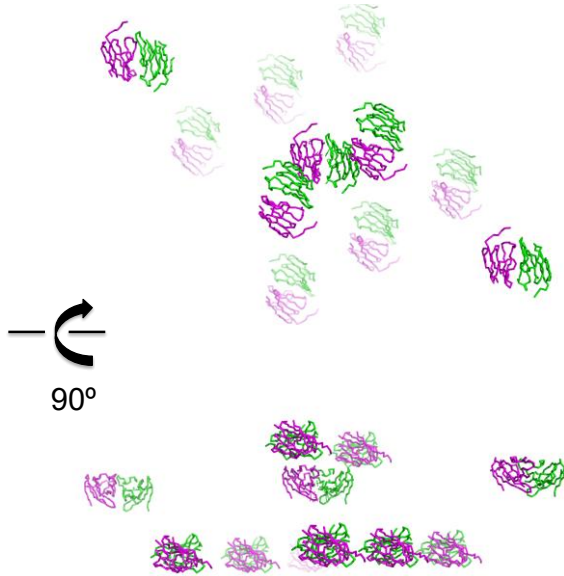



Figure 4-figure supplement 3

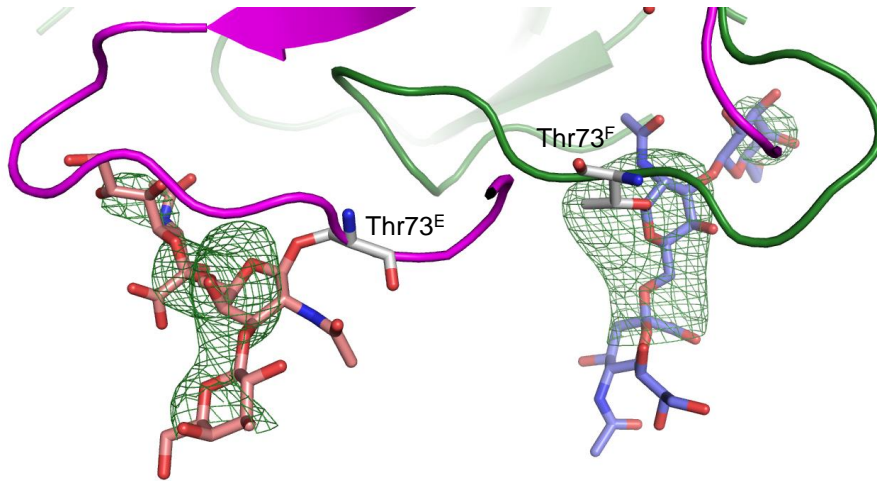

**Figure 5**

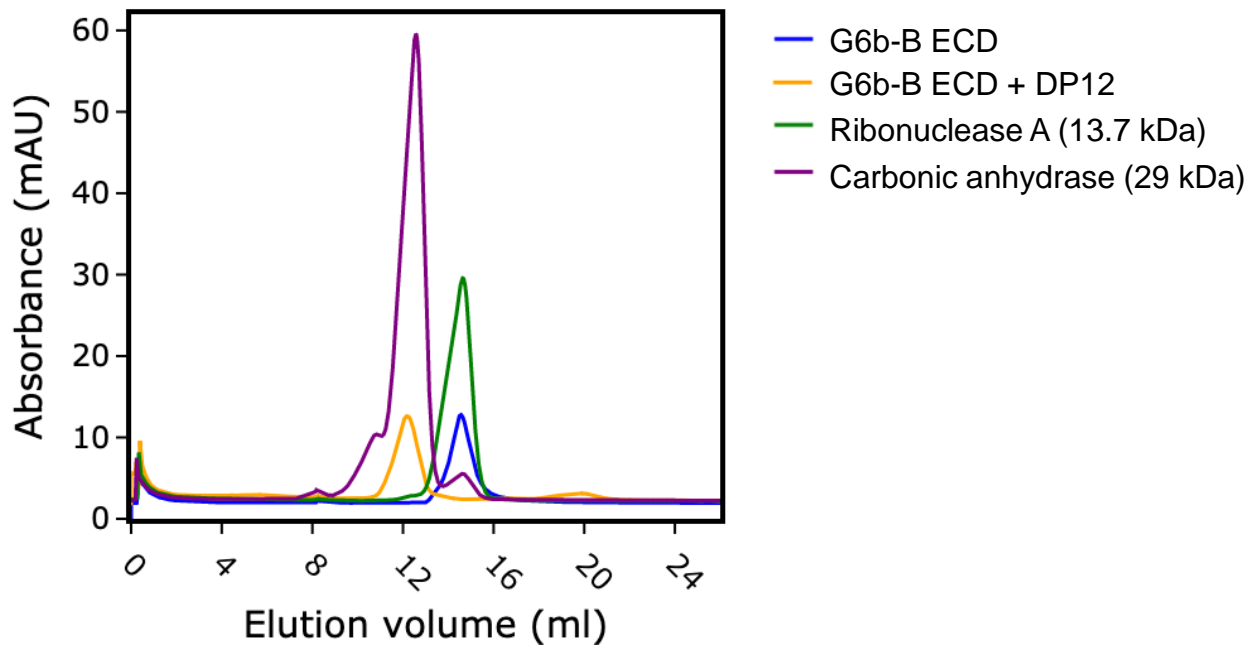

A

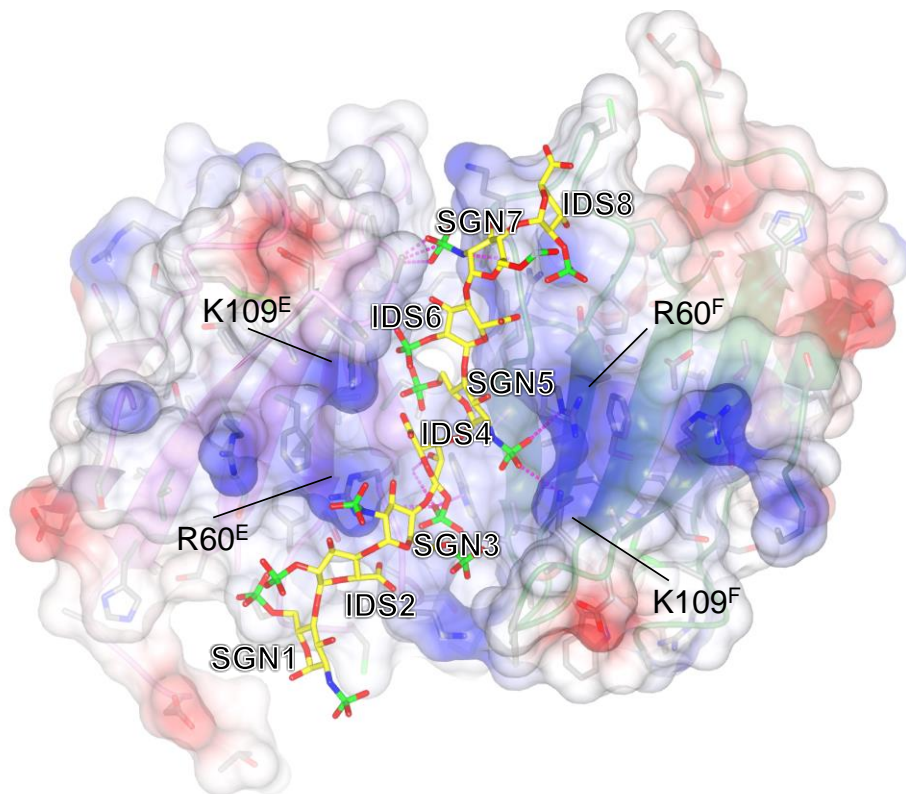

B

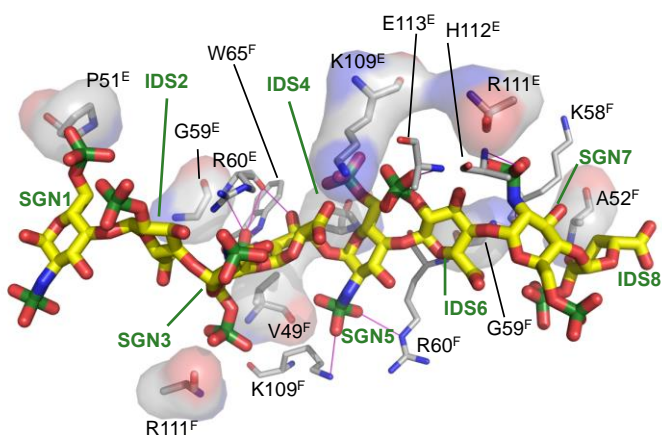

C

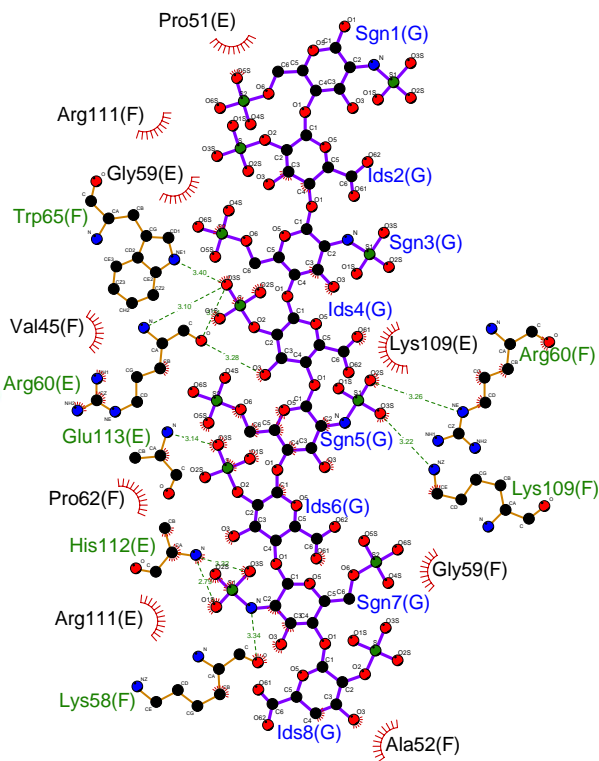

Figure 6-figure supplement 1

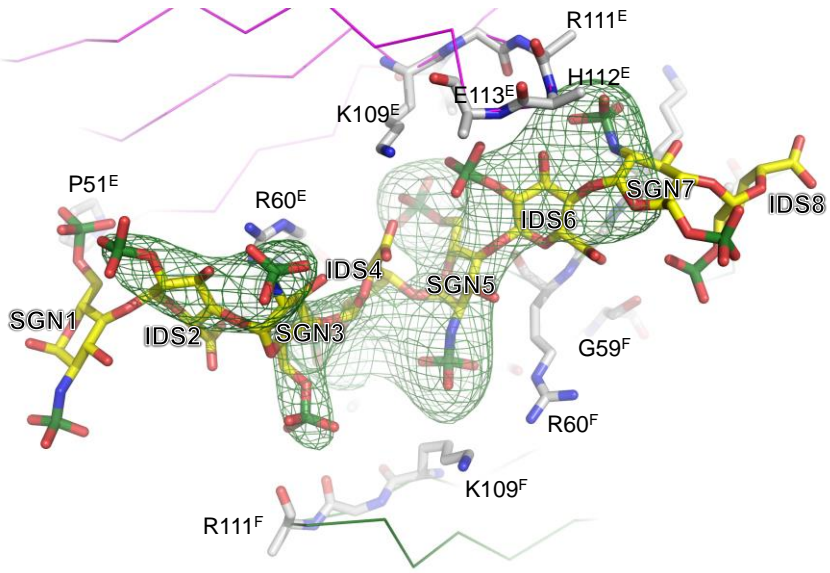

**A**

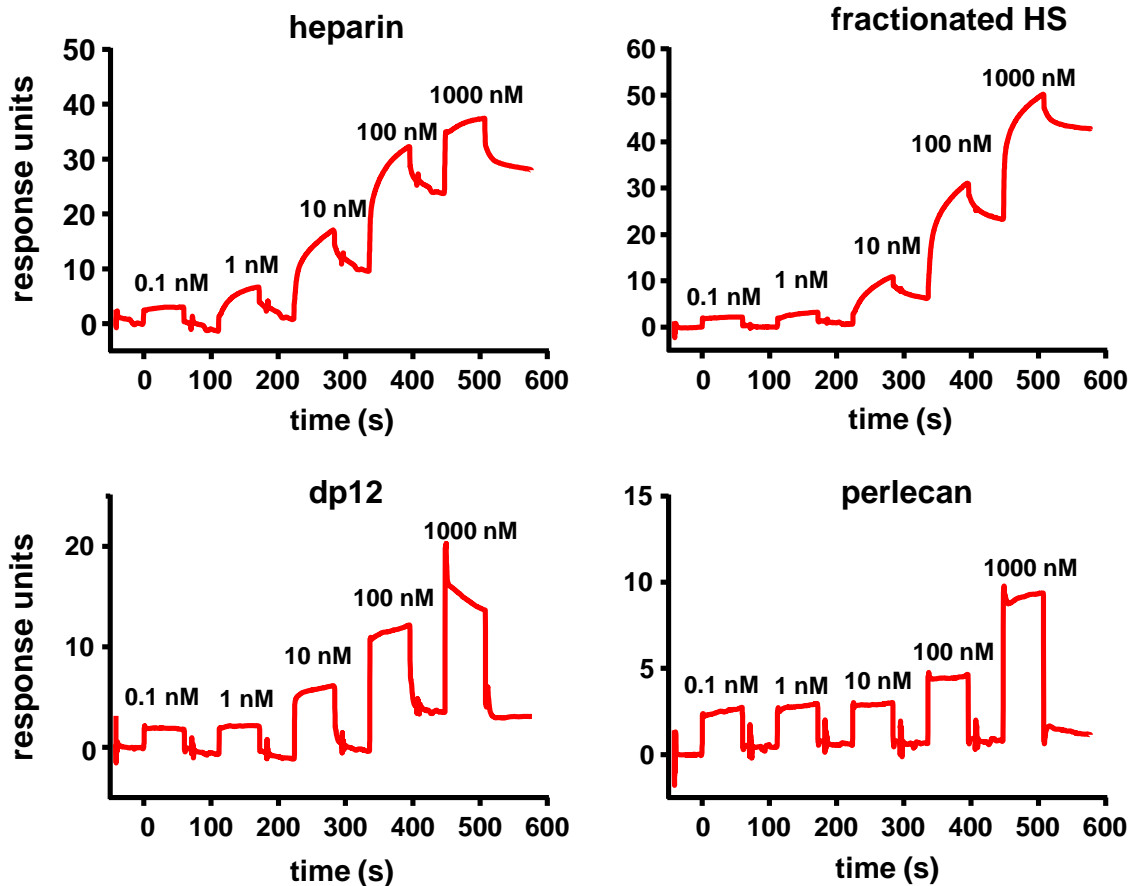

**B**

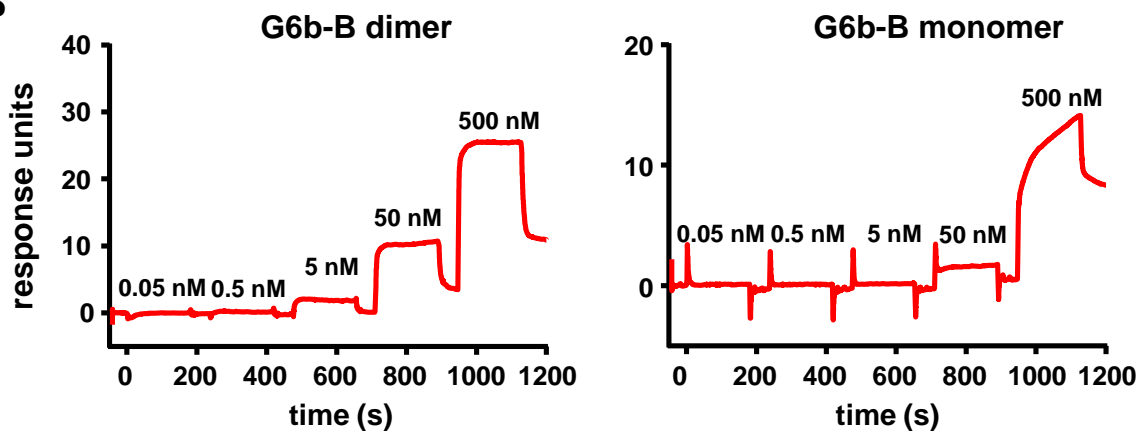

A

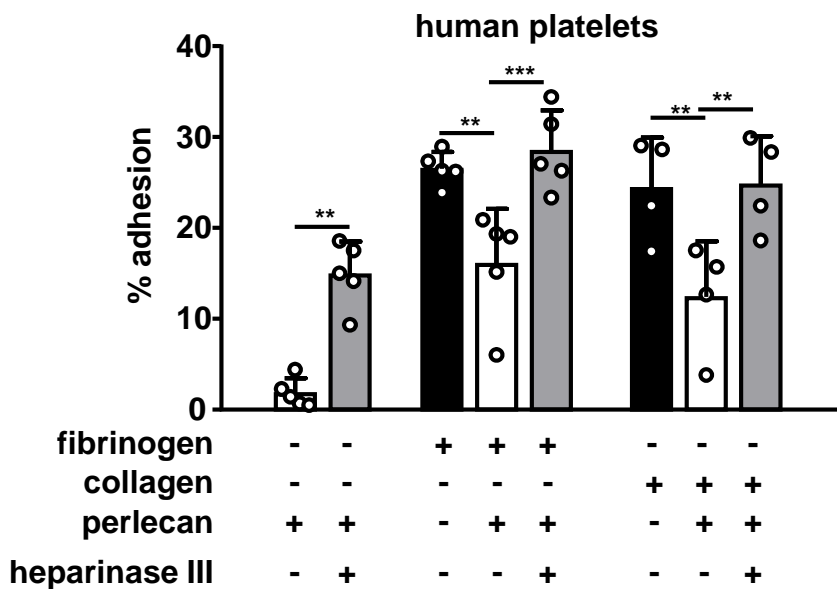

B

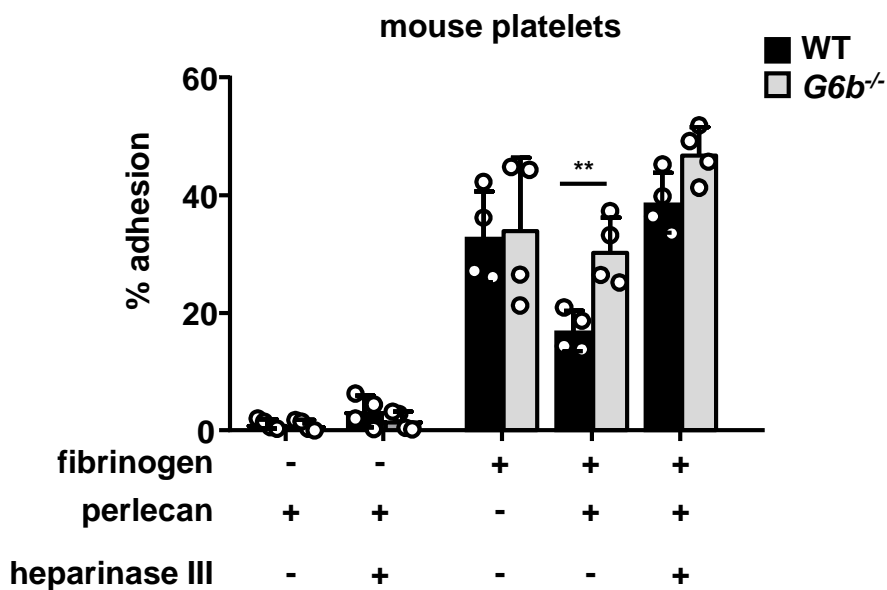

C

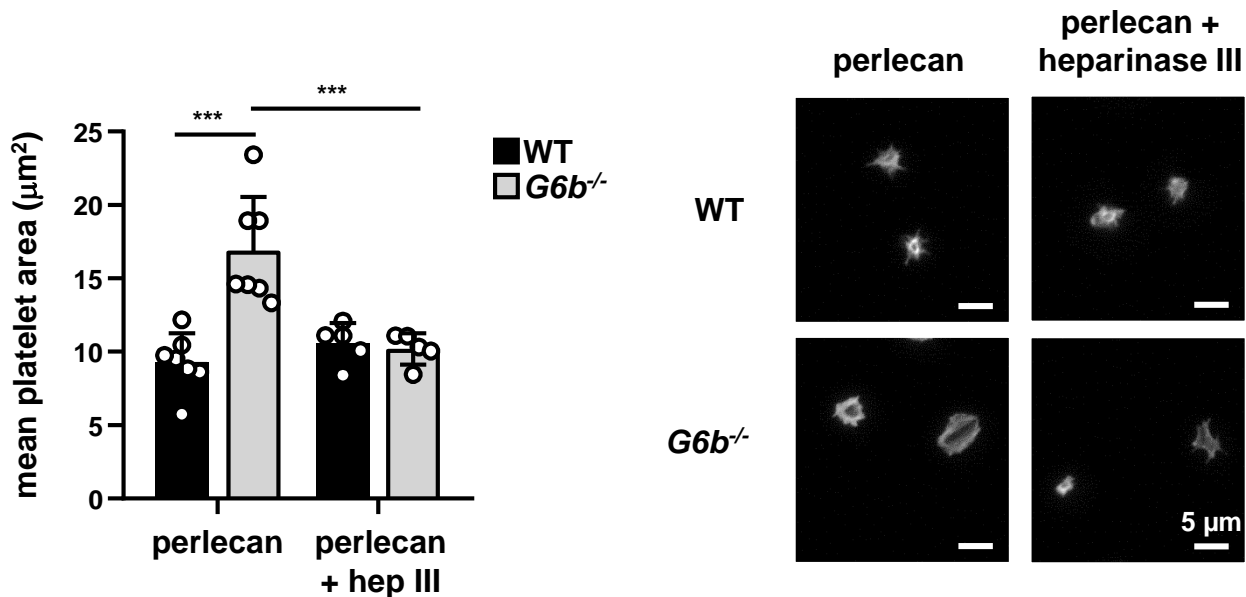

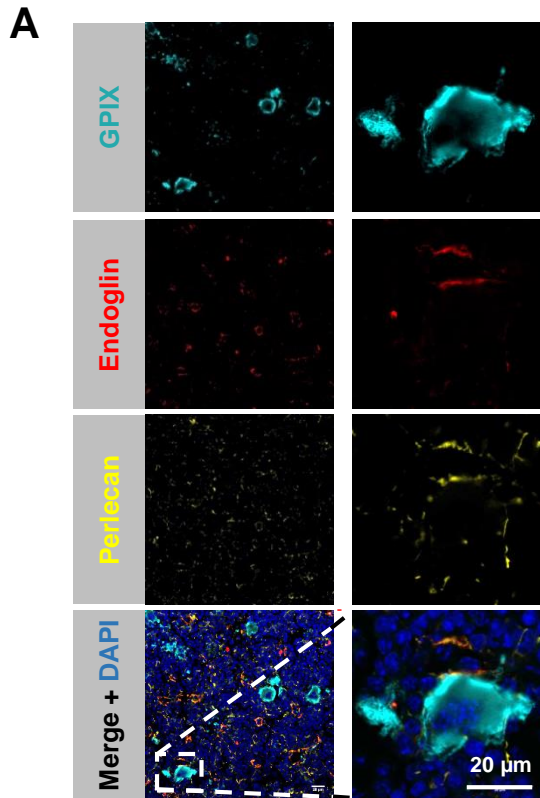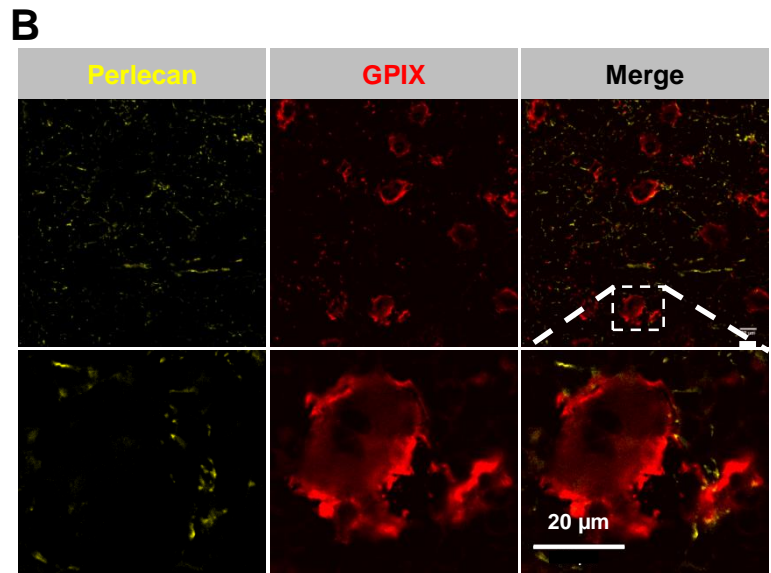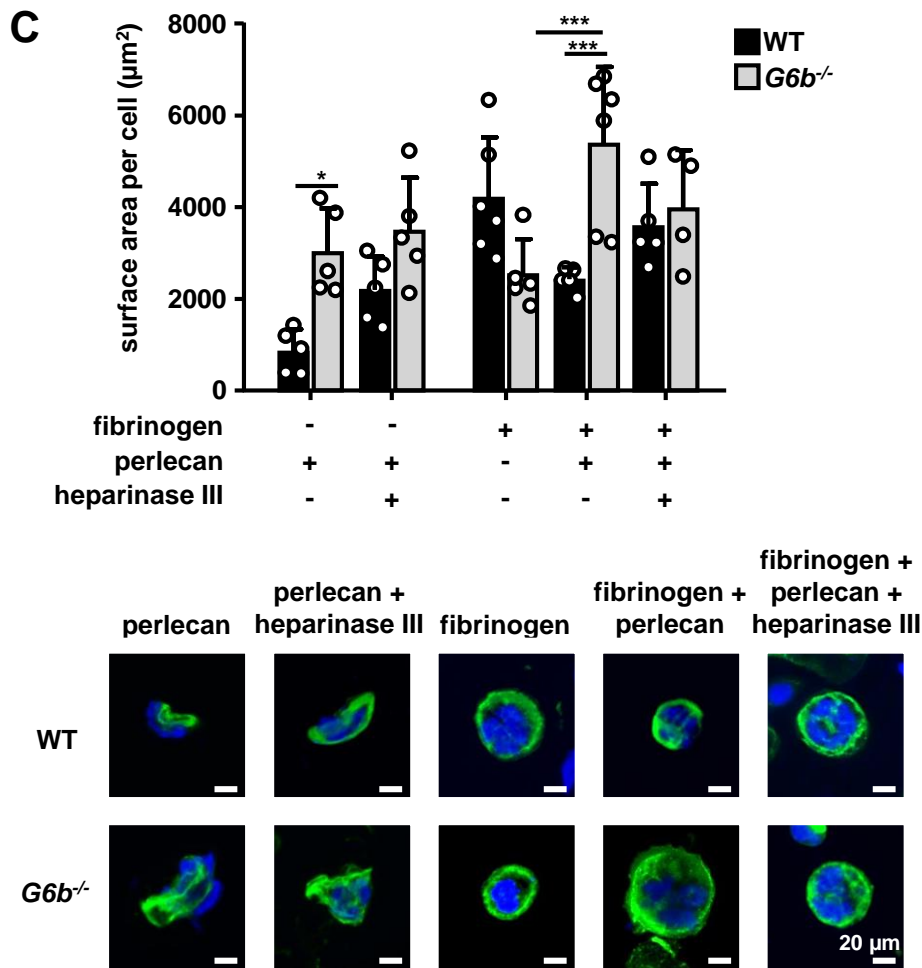

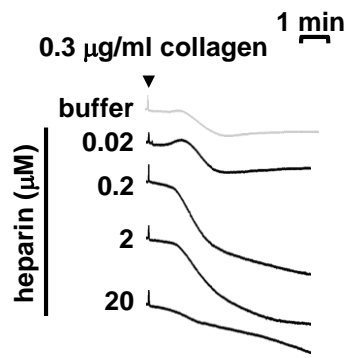

heparin

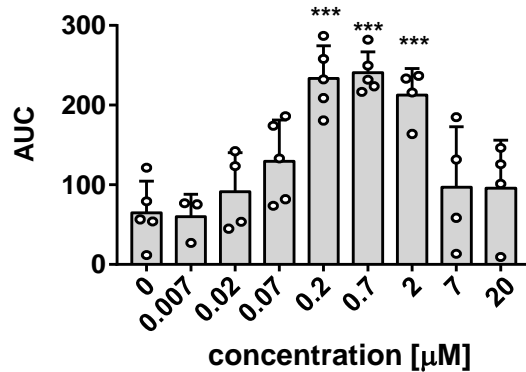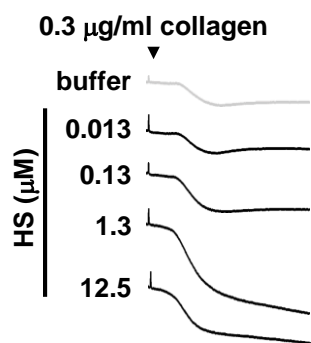

heparan sulfate

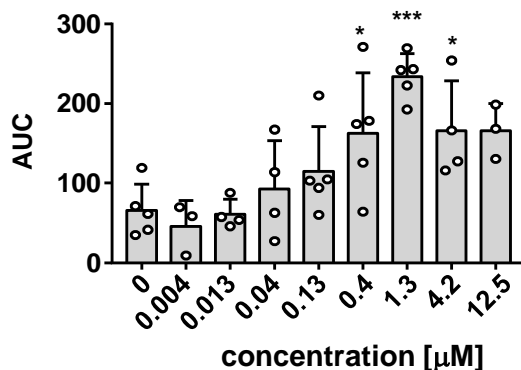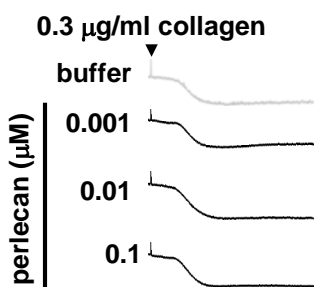

perlecan

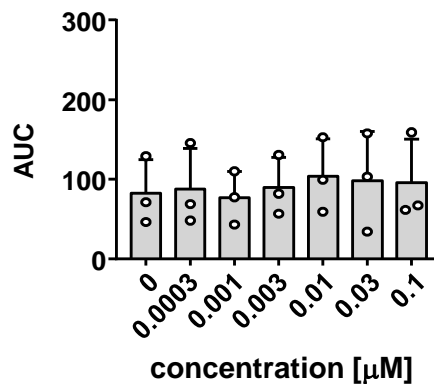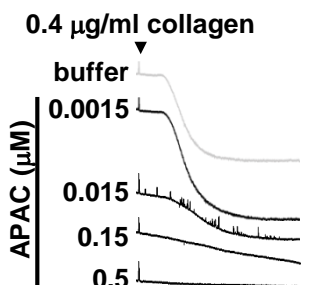

APAC

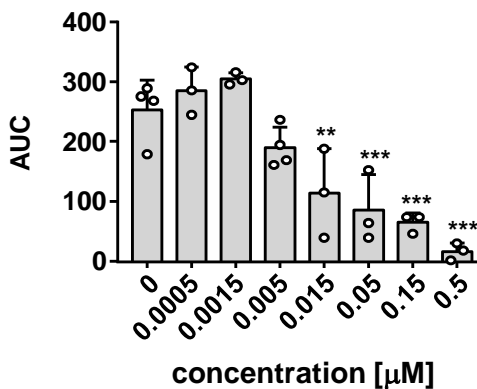



A

resting

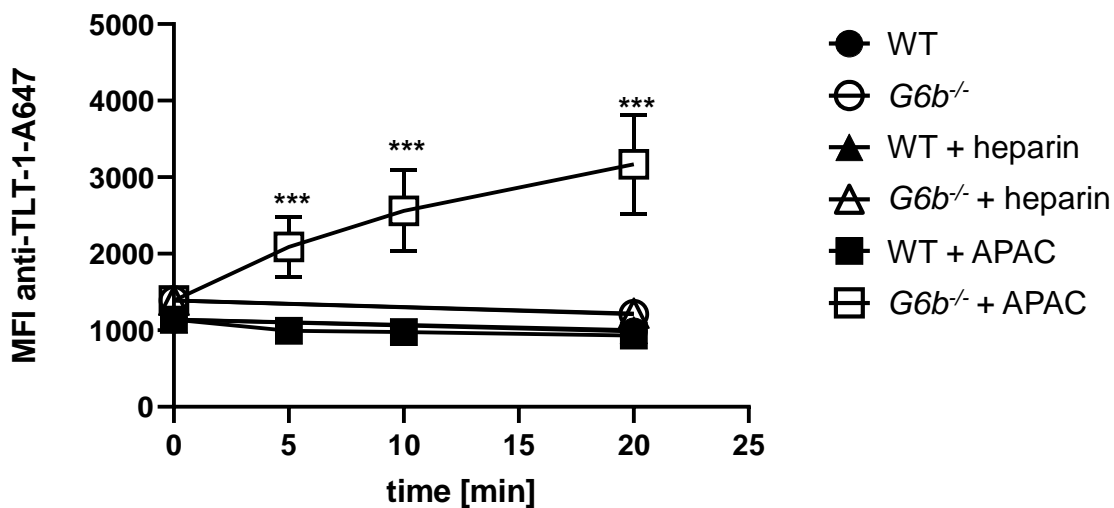

B

CLEC-2 antibody stimulation

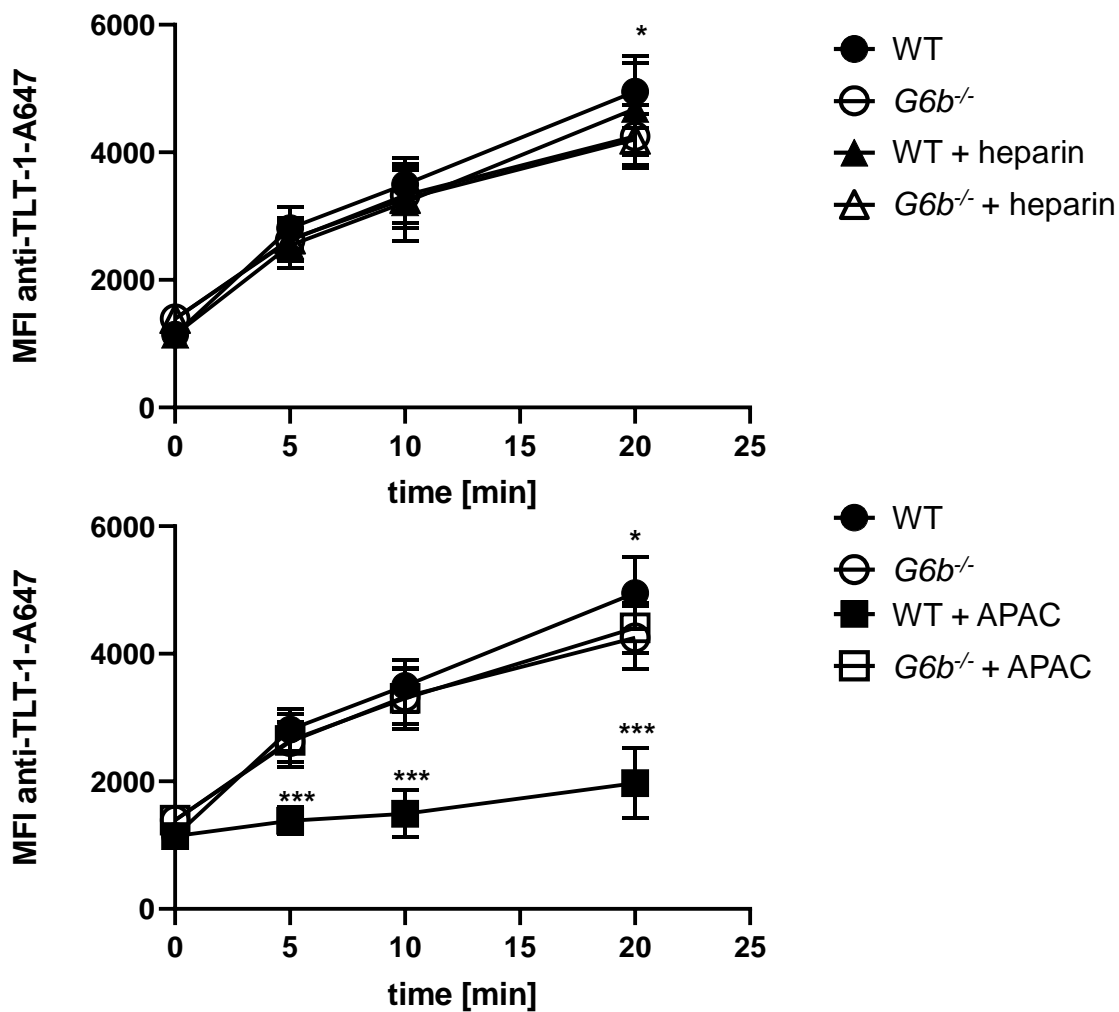

A

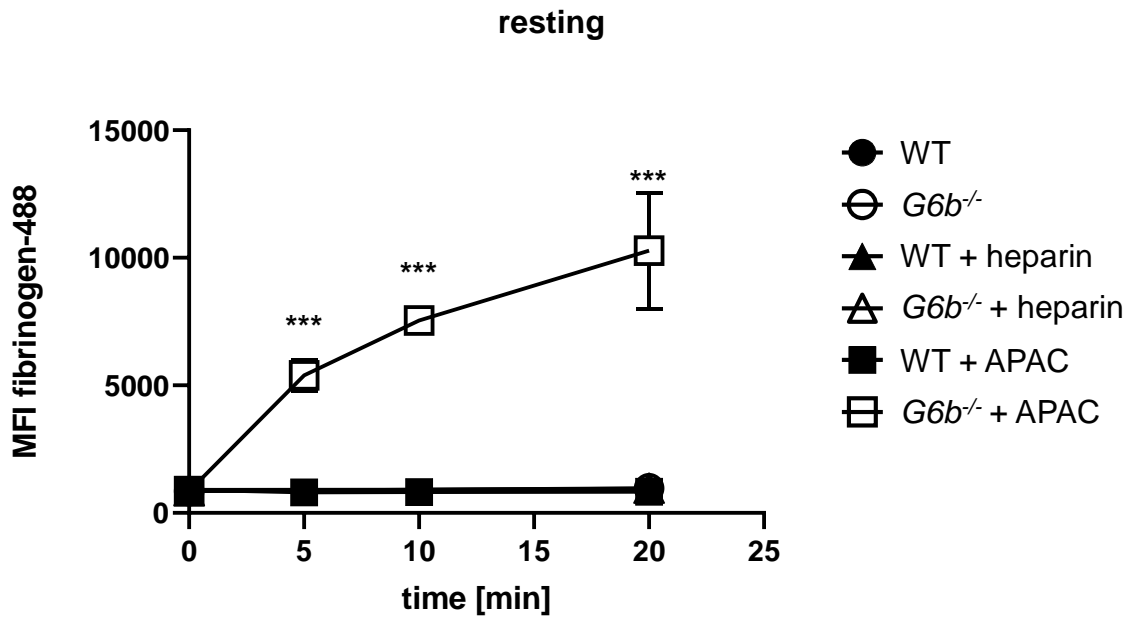

B

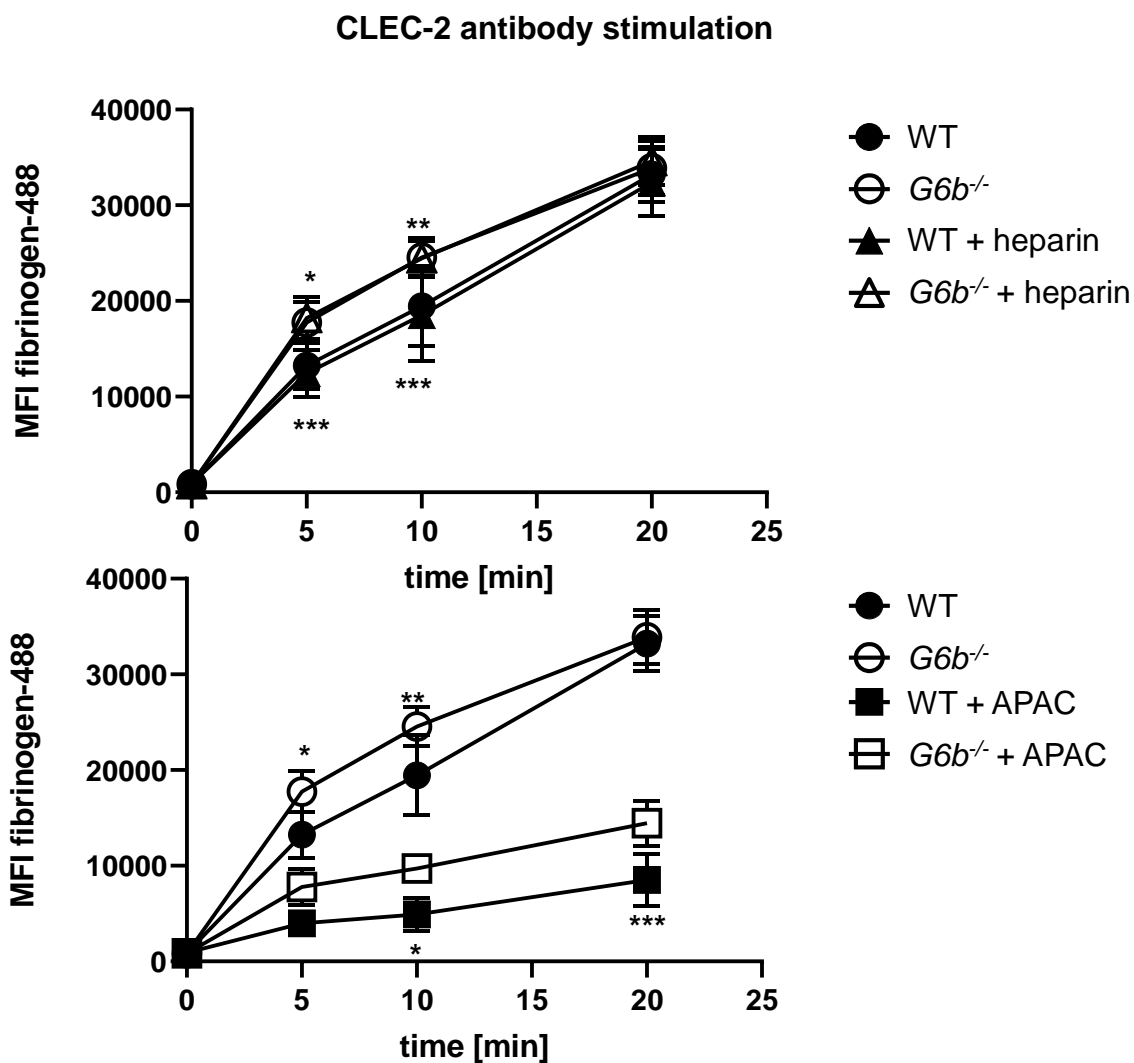

Figure 11–figure supplement 2

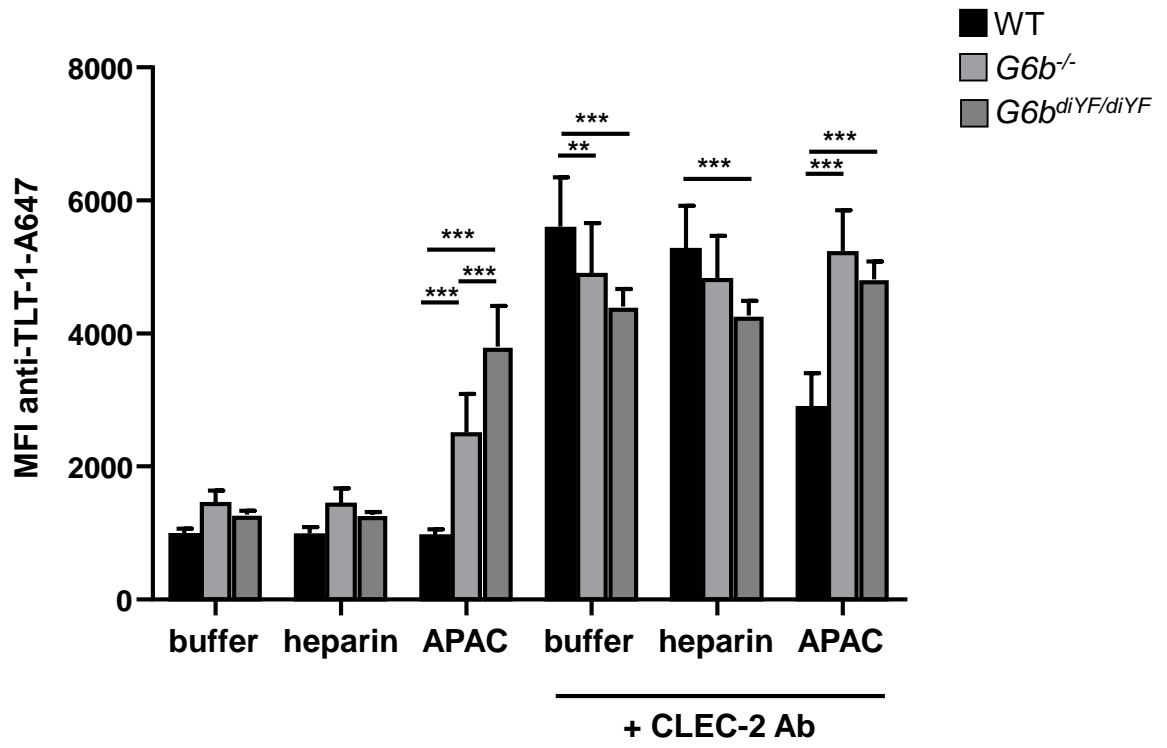

**A**

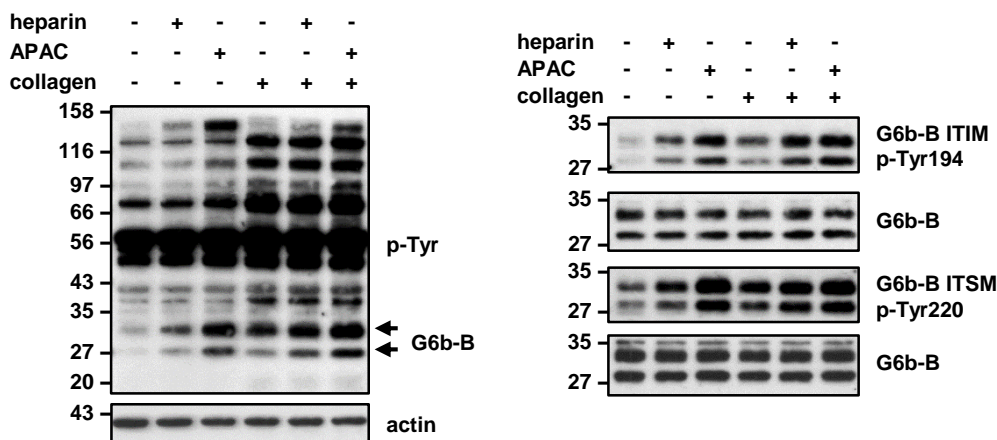

**B**

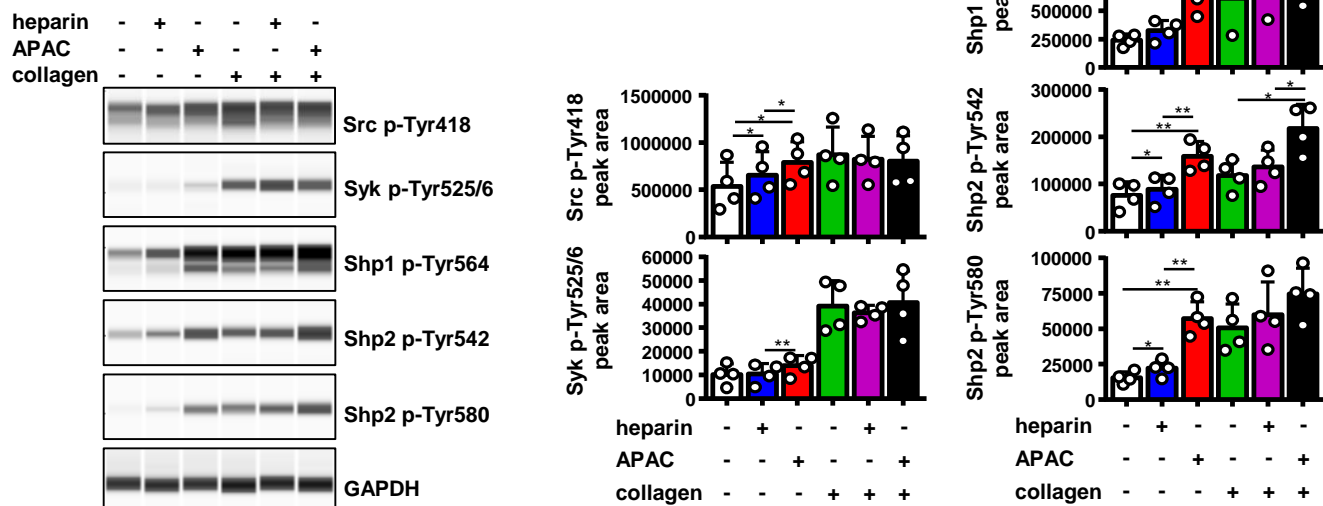

**C**

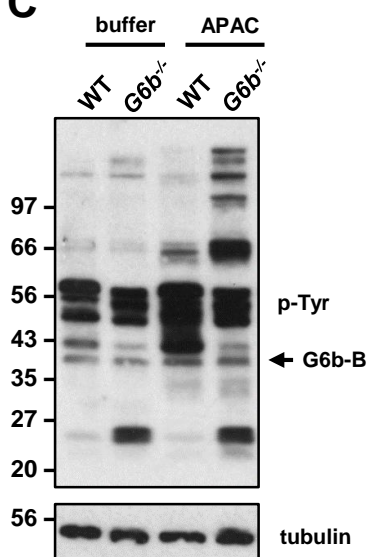

**D**

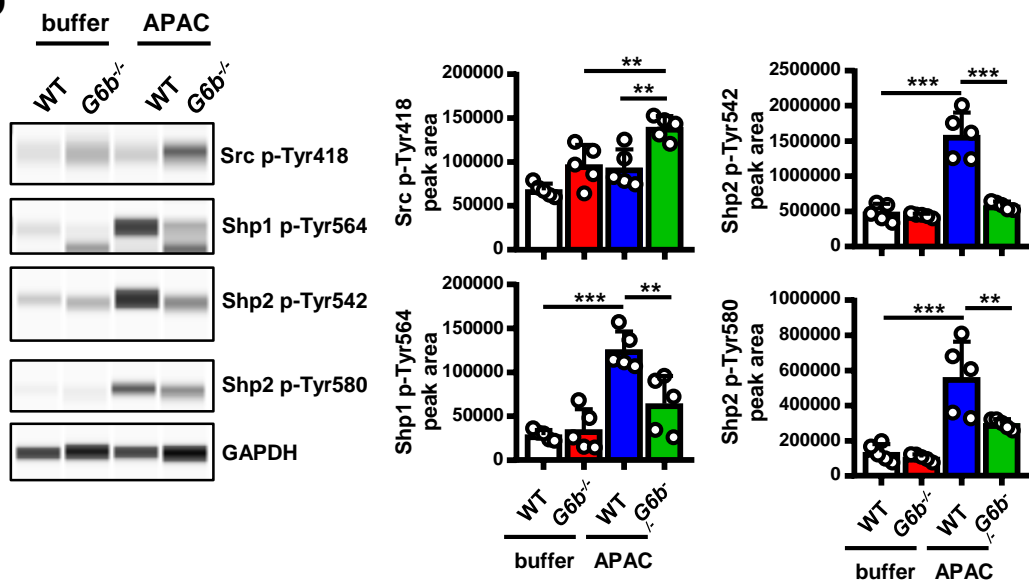

**A**

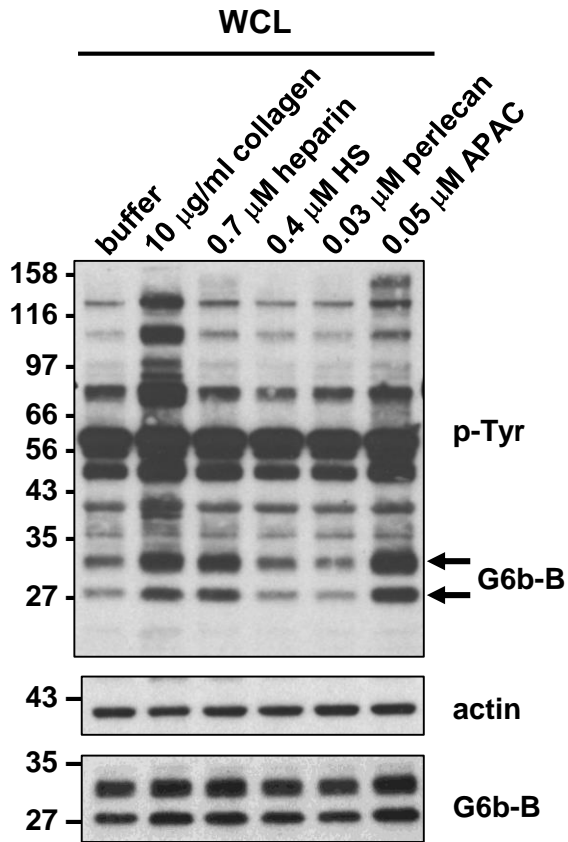

**B**

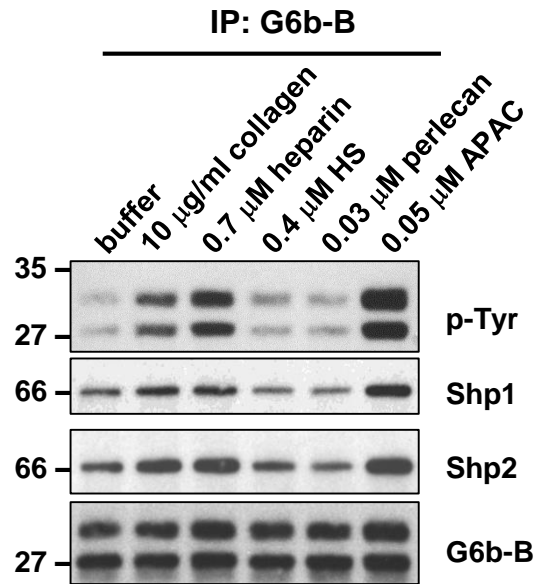

**C**

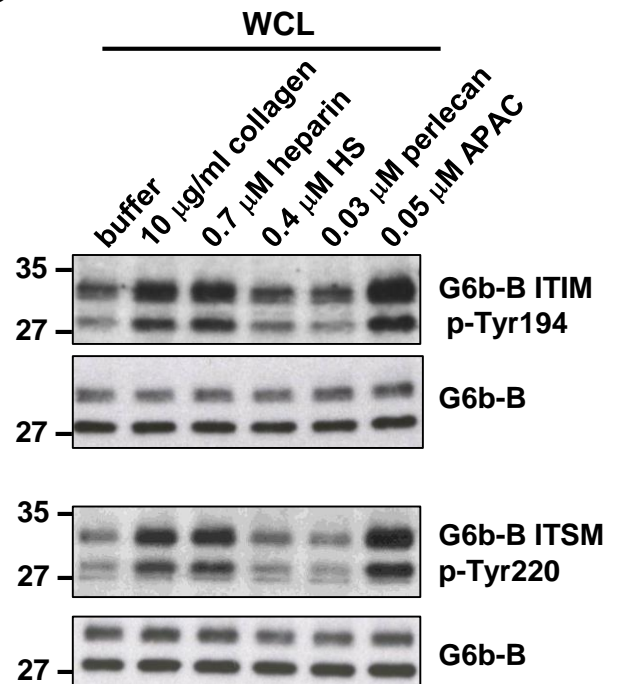

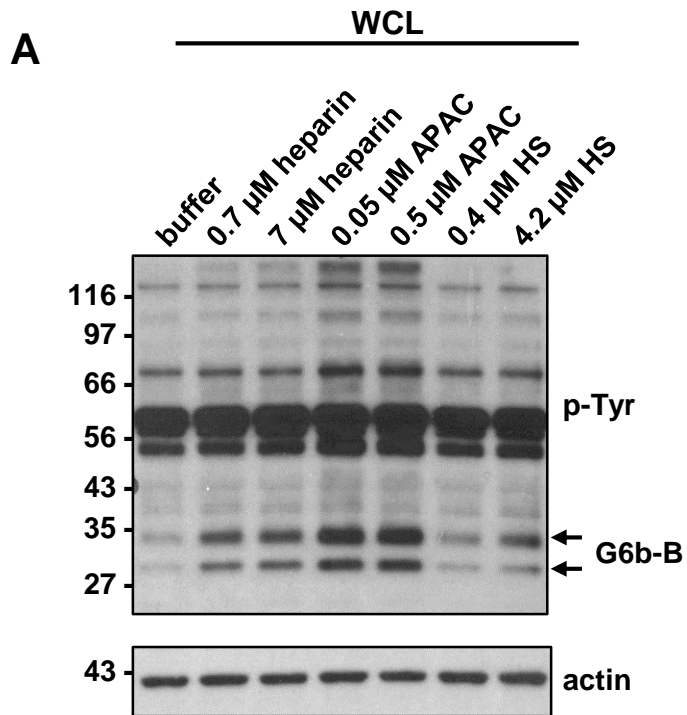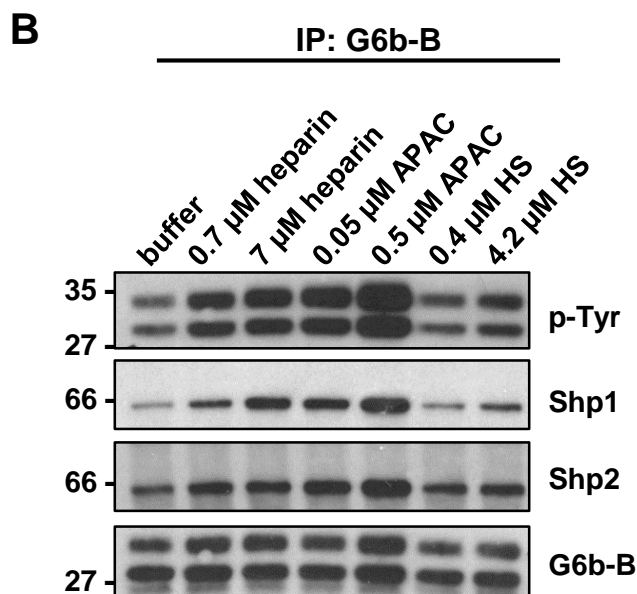

A

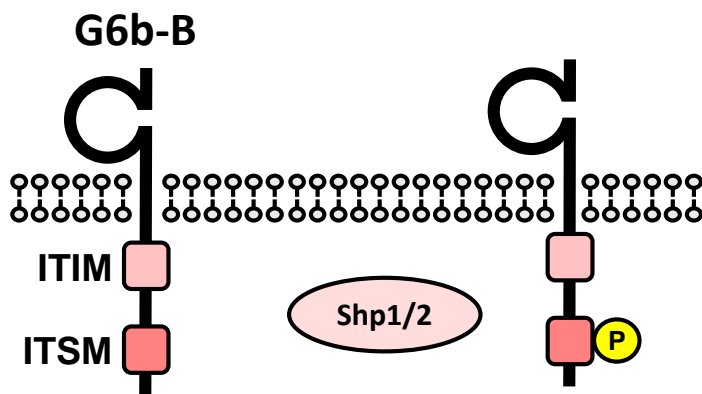

B

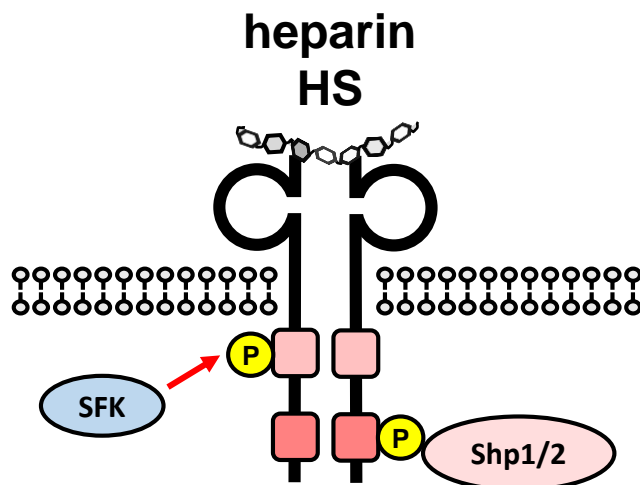

C

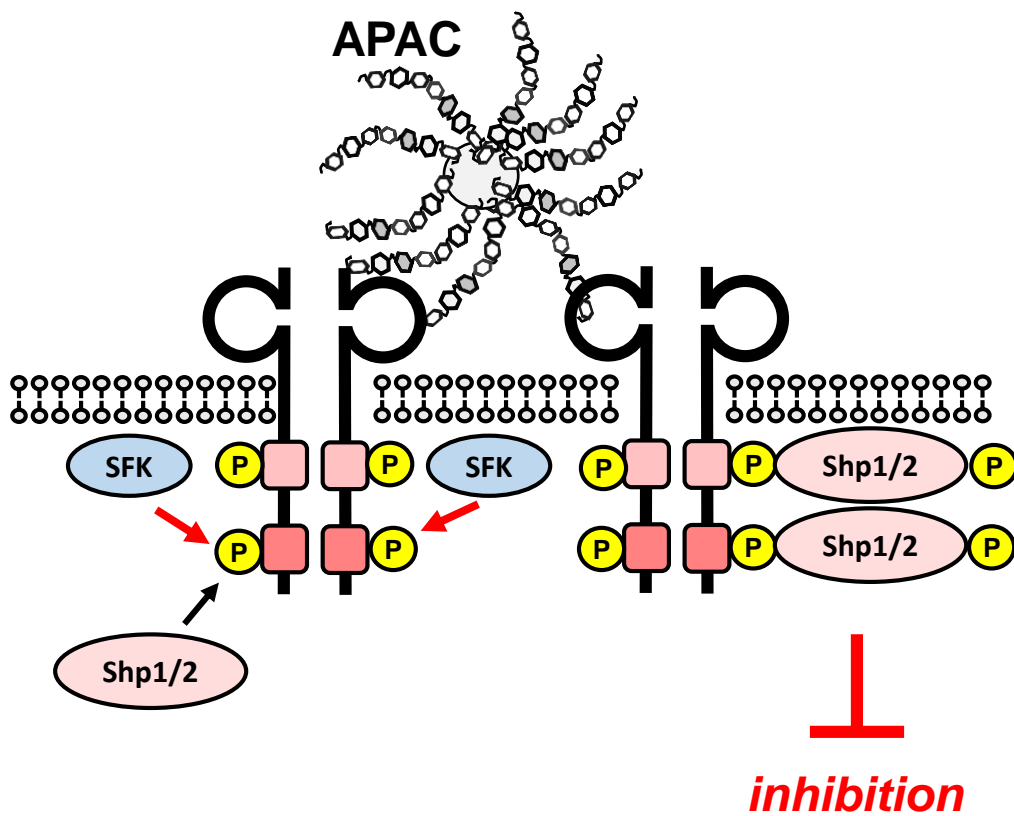

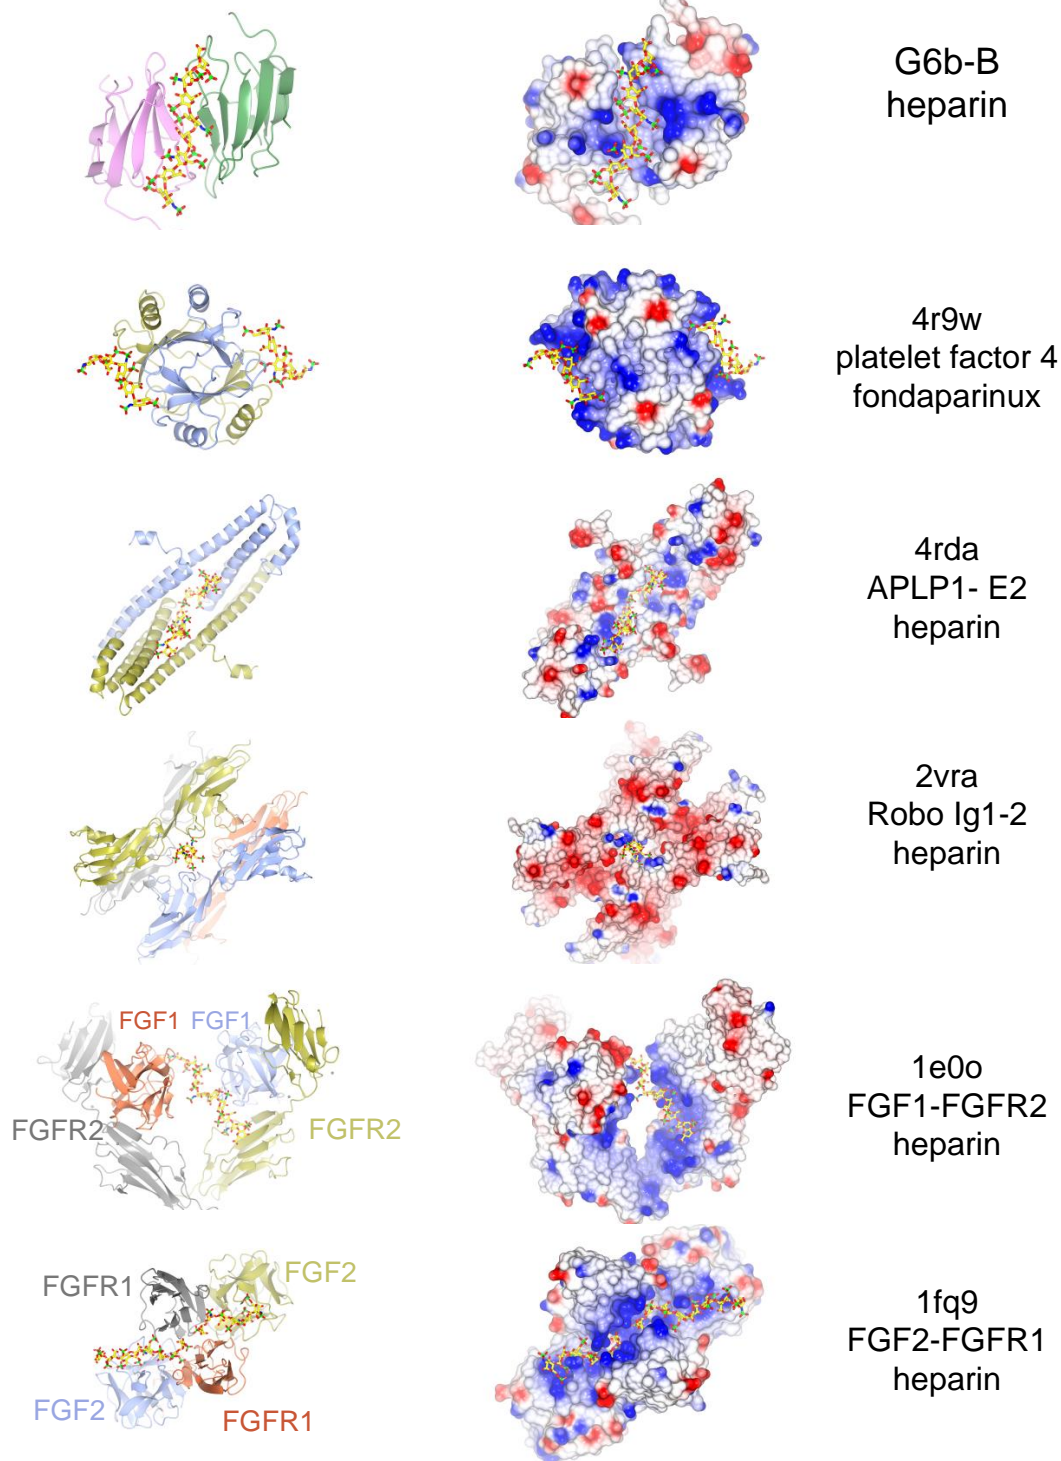

**Supplementary Figure 1. Selected structures of proteins with a heparin ligand.**

Side-by-side views of C $\alpha$  traces (ribbon representation) and electrostatic surfaces of proteins bound to heparin or a heparin analogue. The subset includes structures where the heparin ligand bridges two or more subunits. At the time of writing, the PDB contained 33 proteins structures with heparin as a ligand, in addition to a few structures with heparin analogues. From top to bottom: G6b-B (Fab fragments and glycosyl chains omitted from view); 4r9w – platelet factor 4 bound to fondaparinux (synthetic heparin analogue) (Cai et al., 2015); 4rda – E2 domain of amyloid



precursor protein-like protein 1 (APLP1) (Dahms, Mayer, Roeser, Multhaup, & Than, 2015); 2vra - immunoglobulin-like domains 1 and 2 of Drosophila Robo (Fukuhara, Howitt, Hussain, & Hohenester, 2008); 1e0o – ternary complex of FGF1, FGFR2 and heparin (Pellegrini, Burke, von Delft, Mulloy, & Blundell, 2000); 1fq9 - ternary complex of FGF2, FGFR1 and heparin (Schlessinger et al., 2000). The coloring of the electrostatic surfaces a potential scale from  $-0.5$  V ( $-19.5$  kT/e, red) to  $+0.5$  V ( $+19.5$  kT/e, blue). The ribbon representations are colored by peptide chain, and heparin is shown as a stick model with color codes: C – yellow, O – red, N – blue, S – green.
